# Supplementary material for: Lewis acid-catalyzed Pudovik reaction–phospha-Brook rearrangement sequence to access phosphoric esters
Source: publisher site journal article supplement (doi:10.3762/bjoc.18.123), 2022-09-09

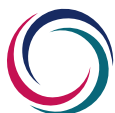

## Supporting Information

for

### **Lewis acid-catalyzed Pudovik reaction–phospha-Brook rearrangement sequence to access phosphoric esters**

Jin Yang, Dang-Wei Qian and Shang-Dong Yang

*Beilstein J. Org. Chem.* **2022**, *18*, 1188–1194. doi:10.3762/bjoc.18.123

### **Experimental details and characterization data ( $^1\text{H}$ , $^{13}\text{C}$ , and $^{31}\text{P}$ NMR as well as chromatograms) of products**

# Table of Contents

|                                                                                                                                     |            |
|-------------------------------------------------------------------------------------------------------------------------------------|------------|
| <b>1. General Information .....</b>                                                                                                 | <b>S3</b>  |
| <b>2. General Procedure for the Synthesis of secondary phosphine<br/>oxides .....</b>                                               | <b>S3</b>  |
| <b>3. General Procedure .....</b>                                                                                                   | <b>S5</b>  |
| <b>4. Experimental procedure for gram-scale reaction .....</b>                                                                      | <b>S6</b>  |
| <b>5. References .....</b>                                                                                                          | <b>S7</b>  |
| <b>6. Characterization Data .....</b>                                                                                               | <b>S7</b>  |
| <b>7. X-ray crystallographic data for 3ak.....</b>                                                                                  | <b>S26</b> |
| <b>8. Scanned <sup>1</sup>H NMR, <sup>13</sup>C NMR, <sup>31</sup>P NMR and <sup>19</sup>F NMR Spectra of All<br/>products.....</b> | <b>S28</b> |

## 1. General Information

$^1\text{H}$  NMR,  $^{13}\text{C}$  NMR,  $^{31}\text{P}$  NMR and  $^{19}\text{F}$  NMR spectra were recorded at room temperature using a Avance-400 instruments ( $^1\text{H}$  NMR at 400 MHz,  $^{13}\text{C}$  NMR at 125 MHz,  $^{31}\text{P}$  NMR at 121 MHz and  $^{19}\text{F}$ -NMR at 282 MHz), NMR spectra of all products were reported in ppm with reference to solvent signals [ $^1\text{H}$  NMR:  $\text{CD}(\text{H})\text{Cl}_3$  (7.26 ppm),  $^{13}\text{C}$  NMR:  $\text{CD}(\text{H})\text{Cl}_3$  (77.00 ppm)]. Signal patterns are indicated as s, singlet; d, doublet; dd, doublets of doublet; t, triplet, and m, multiplet. The mass spectrometry was performed in the positive electrospray ionization (ESI+) mode. Reactions were monitored by thin-layer chromatography Column chromatography (petroleum ether/ethyl acetate) was performed on silica gel (200-300 mesh). Analytical grade solvents and commercially available reagents were purchased from commercial sources and used directly without further purification unless otherwise stated. Anhydrous tetrahydrofuran (THF) was prepared by refluxing the analyzed tetrahydrofuran with sodium.

## 2. General Procedure for the Synthesis of secondary phosphine oxides

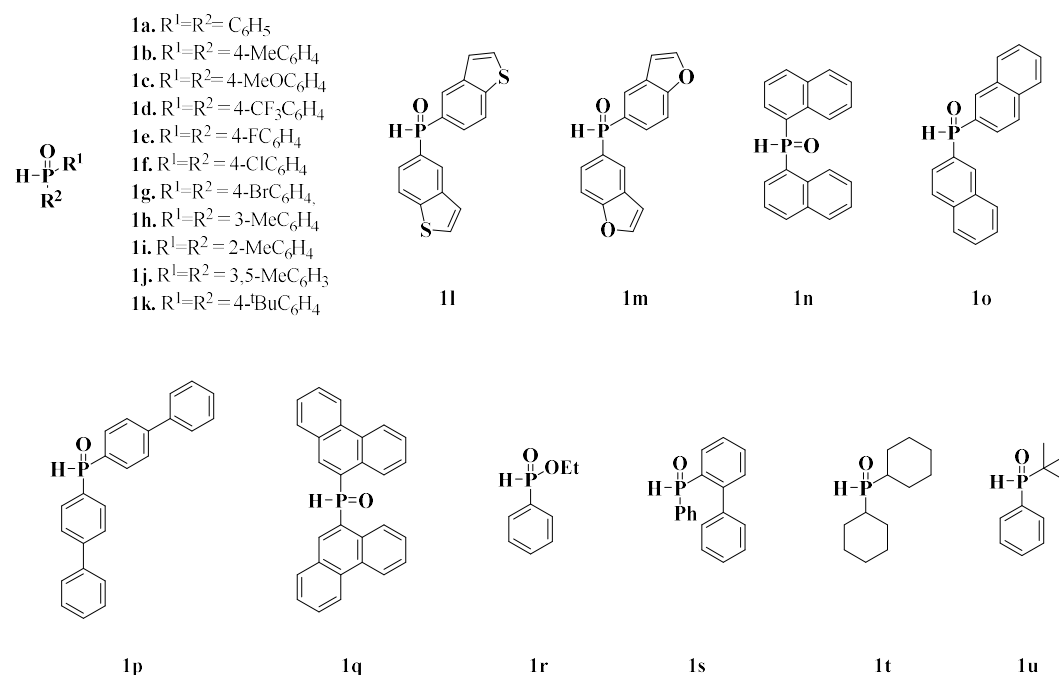

### General procedure A: Synthesis of symmetric secondary phosphine oxides

Synthesis of **1b** is representative

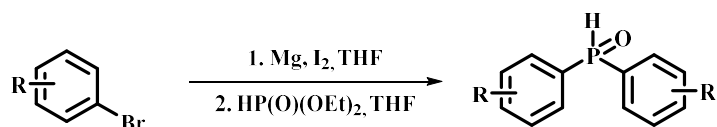

To a mixture of magnesium (0.53 g, 22 mmol) and THF (10 mL) was added a solution of 1-bromo-4-methylbenzene (2.46 mL, 20 mmol) in THF (10 mL) dropwise with a dropping funnel at 0 °C and the resulting mixture was stirred for 1 h. After cooled to 0 °C, a solution of diethylphosphite (0.65 mL, 5.0 mmol) in THF (10 mL) was added dropwise with a dropping funnel at 0 °C. After stirring at 0 °C for 1 h, the reaction was quenched with 100 ml 0.1 N HCl and the product was extracted with AcOEt. The combined organic layer was washed with brine, dried over Na<sub>2</sub>SO<sub>4</sub> and concentrated under reduced pressure. The residue was purified by silica gel column chromatography (petroleum ether/ethyl acetate= 1:1) followed by recrystallization from a petroleum ether/ethyl acetate mixture to afford **1b**.

The spectral data were in accordance with those previously reported in the literature.<sup>1</sup>

### General procedure B: Synthesis of asymmetric secondary phosphine oxides

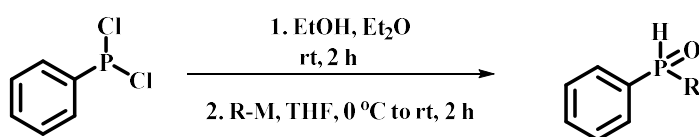

A 50 mL round-bottomed flask equipped with a magnetic stirrer under air atmosphere was charged with dichlorophenylphosphine (1.35 mL, 10.0 mmol) and Et<sub>2</sub>O (25 mL). EtOH (1.45 mL, 25.0 mmol) was added dropwise over 5 mins and the resulting solution was stirred at r.t for 2 hours. The solvent was removed under vacuum and the resulting crude ethyl phosphinate was dissolved in THF (12 mL) under a nitrogen atmosphere. The appropriate organometallic reagent (2.2 equiv.) in THF was cooled to

0 °C under an inert atmosphere and the ethyl phosphinate solution was added dropwise at 0 °C over 30 mins. The reaction was stirred at r.t for 2 hours then quenched with sat. aq. NH<sub>4</sub>Cl solution. Water (70 mL) was then added and the aqueous phase was then extracted with CHCl<sub>3</sub> (3 × 150 mL). The combined organic fractions were dried over anhydrous Na<sub>2</sub>SO<sub>4</sub>, concentrated in vacuo, and the crude residue purified by column chromatography to afford the desired secondary phosphine oxide.

The spectral data were in accordance with those previously reported in the literature.<sup>2,3,4</sup>

### 3.General Procedure

#### 3.1 Table S1. Screening of Optimal Reaction Conditions

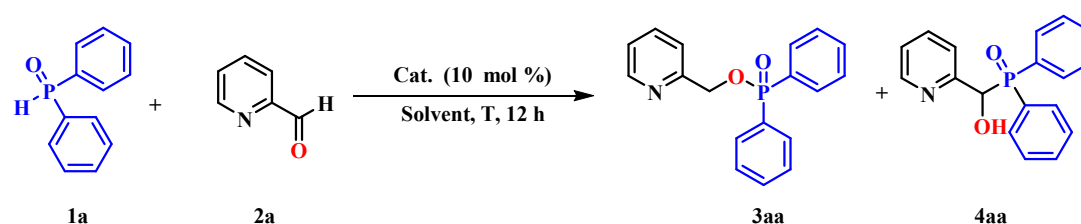

| entry | cat.                 | Solvent | Temp/°C | 3aa(%) <sup>b</sup> | 4aa(%) <sup>b</sup> |
|-------|----------------------|---------|---------|---------------------|---------------------|
| 1     | Cu(OTf) <sub>2</sub> | THF     | 100     | 90                  | N.D.                |
| 2     | Zn(OTf) <sub>2</sub> | THF     | 100     | 80                  | trace               |
| 3     | Al(OTf) <sub>3</sub> | THF     | 100     | 83                  | trace               |
| 4     | Bi(OTf) <sub>3</sub> | THF     | 100     | 86                  | N.D.                |
| 5     | AgOTf                | THF     | 100     | 68                  | trace               |
| 6     | Sn(OTf) <sub>2</sub> | THF     | 100     | 71                  | trace               |
| 7     | Sc(OTf) <sub>3</sub> | THF     | 100     | 74                  | trace               |
| 8     | Cu(OTf) <sub>2</sub> | MeCN    | 100     | 53                  | N.D.                |
| 9     | Cu(OTf) <sub>2</sub> | DCM     | 100     | 53                  | N.D.                |
| 10    | Cu(OTf) <sub>2</sub> | AcOEt   | 100     | 61                  | N.D.                |
| 11    | Cu(OTf) <sub>2</sub> | Tol     | 100     | 62                  | N.D.                |
| 12    | Cu(OTf) <sub>2</sub> | THF     | 80      | 23                  | 66                  |
| 13    | Cu(OTf) <sub>2</sub> | THF     | 60      | trace               | 83                  |
| 14    | Cu(OTf) <sub>2</sub> | THF     | 40      | N.D.                | 72                  |
| 15    | Cu(OTf) <sub>2</sub> | THF     | 25      | N.D.                | 56                  |
| 16    | Cu(OTf) <sub>2</sub> | THF     | 120     | 74                  | N.D.                |

**Table S1<sup>a</sup>** Reaction conditions: diphenylphosphine oxide (0.2 mmol), 2-Pyridinecarboxaldehyde (0.3 mmol), catalyst (10 mol%), solvent (2 mL) under Ar at 100 °C for 12 h.<sup>b</sup> Isolated yields unless otherwise noted.

### 3.2 General Procedure for the Synthesis of O-Phosphination

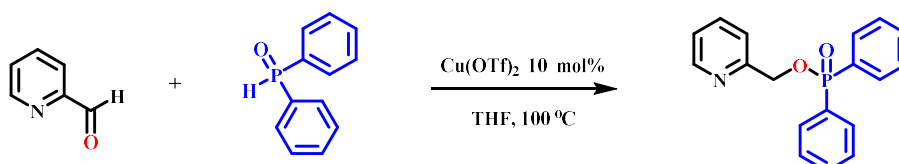

To a 10 mL glass tube equipped with a stir bar was added picolinaldehyde (0.3 mmol, 1.5equiv, 28.5  $\mu\text{L}$ ), diphenylphosphine oxide (0.2 mmol, 1.0equiv, 40.0 mg),  $\text{Cu}(\text{OTf})_2$  (0.01 mmol, 10 mol%, 7.2 mg). The glass tube is sealed with a rubber stopper and the air in the tube is replaced with argon three times, then the anhydrous THF (2 mL) was added to the mixed solution by microinjector and stirred at 100 °C for 12 h until complete consumption of starting material diphenylphosphine oxide as monitored by TLC analysis. After the reaction was finished, the resulting solution was filtered and washed with ethyl acetate. The combined filtrates were concentrated under reduced pressure to give the crude product. The residue was purified on a silica-gel column chromatography (eluent: petroleum ether/ethyl acetate, Df= 1 : 2) to provide the desired product (90%, 55.6 mg).

## 4. Experimental procedure for gram-scale reaction

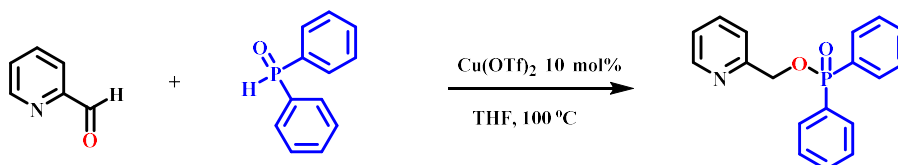

To a 100 mL glass tube equipped with a stir bar was added picolinaldehyde (15 mmol, 1.5equiv, 1.43 mL), diphenylphosphine oxide (10 mmol, 1.0equiv, 2.02 g),  $\text{Cu}(\text{OTf})_2$  (0.01 mmol, 10 mol%, 0.362 g). The glass tube is sealed with a rubber stopper and the air in the tube is replaced with argon three times, then the anhydrous

THF (40 ml) was added to the mixed solution by microinjector and stirred at 100 °C for 12 h until complete consumption of starting material diphenylphosphine oxide as monitored by TLC analysis. After the reaction was finished, the resulting solution was filtered and washed with ethyl acetate. The combined filtrates were concentrated under reduced pressure to give the crude product. The residue was purified on a silica-gel column chromatography (eluent: petroleum ether/ethyl acetate. Df= 1 : 2) to provide the desired product .(83%, 2.56g ).

## 5. References

1. Zhang, X.; Wang, J.; Yang, S.D. ACS Catal. 2021, 11, 14008-14015.
2. Kuo, L. Y.; Baker, D. C.; Dortignacq, A. K.; Dill, K. M. Organometallics. 2013, 32, 4759-4765.
3. Beaud, R.; Phipps, R. J.; Gaunt, M. J. J. Am. Chem. Soc. 2016, 138, 13183-13186.
4. Petit, C.; Favre-Réguillon, A.; Mignani, G.; Lemaire, M. Green Chem. 2010, 12, 326-330.

## 6. Characterization Data

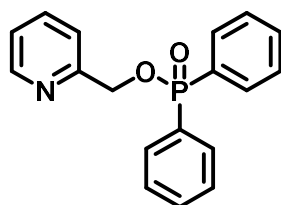

### pyridin-2-ylmethyl diphenylphosphinate (3aa)

Compound 3aa was isolated in 90% yield; <sup>1</sup>H NMR (400 MHz, CDCl<sub>3</sub>) δ 8.52 (d, *J* = 4.6 Hz, 1H), 7.94 – 7.78 (m, 4H), 7.74 – 7.62 (m, 1H), 7.60 – 7.34 (m, 7H), 7.17 (dd, *J* = 7.0, 5.3 Hz, 1H), 5.19 (d, *J* = 7.4 Hz, 2H). <sup>13</sup>C NMR (101 MHz, CDCl<sub>3</sub>) δ 156.18 (d, *J* = 8.1 Hz), 149.06 (s), 136.84 (s), 132.34 (d, *J* = 2.7 Hz), 131.60 (d, *J* = 10.2 Hz), 130.21 (s), 128.64 (t, *J* = 11.8 Hz), 122.84 (s), 121.49 (s), 66.76 (d, *J* = 5.4 Hz). <sup>31</sup>P NMR (162 MHz, CDCl<sub>3</sub>) δ 32.93 (s). HRMS (ESI): [M+H]<sup>+</sup> calcd for C<sub>18</sub>H<sub>16</sub>NO<sub>2</sub>P 310.0991, found 310.0988.

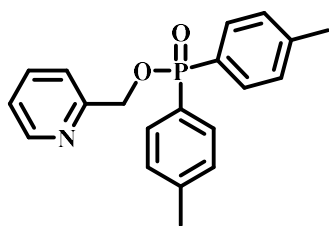

**pyridin-2-ylmethyl di-p-tolylphosphinate (3ab)**

Compound 3ab was isolated in 90% yield;  $^1\text{H}$  NMR (400 MHz,  $\text{CDCl}_3$ )  $\delta$  8.53 (d,  $J$  = 4.6 Hz, 1H), 7.80 – 7.64 (m, 5H), 7.54 (t,  $J$  = 10.0 Hz, 1H), 7.26 (dd,  $J$  = 7.9, 3.0 Hz, 4H), 7.24 – 7.17 (m, 1H), 5.14 (d,  $J$  = 7.3 Hz, 2H), 2.38 (s, 7H).  $^{13}\text{C}$  NMR (101 MHz,  $\text{CDCl}_3$ )  $\delta$  156.67 (d,  $J$  = 8.4 Hz), 149.12 (s), 142.84 (d,  $J$  = 2.8 Hz), 136.86 (s), 131.72 (d,  $J$  = 10.6 Hz), 129.36 (d,  $J$  = 13.6 Hz), 128.62 (s), 127.23 (s), 122.78 (s), 121.50 (s), 66.68 (d,  $J$  = 5.3 Hz), 21.66 (s).  $^{31}\text{P}$  NMR (162 MHz,  $\text{CDCl}_3$ )  $\delta$  33.98 (s). HRMS (ESI):  $[\text{M}+\text{H}]^+$  calcd for  $\text{C}_{20}\text{H}_{20}\text{NO}_2\text{P}$  338.1304, found 338.1306.

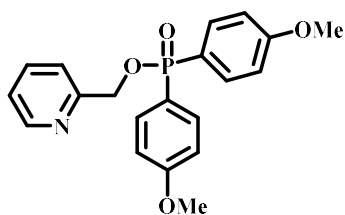

**pyridin-2-ylmethyl bis(4-methoxyphenyl)phosphinate(3ac)**

Compound 3ac was isolated in 72% yield;  $^1\text{H}$  NMR (400 MHz,  $\text{CDCl}_3$ )  $\delta$  8.54 (d,  $J$  = 4.1 Hz, 1H), 7.79 (dd,  $J$  = 11.5, 8.7 Hz, 4H), 7.70 (t,  $J$  = 7.7 Hz, 1H), 7.56 (t,  $J$  = 7.0 Hz, 1H), 7.19 (dd,  $J$  = 17.6, 10.3 Hz, 1H), 6.96 (dd,  $J$  = 8.5, 2.1 Hz, 4H), 5.13 (d,  $J$  = 7.3 Hz, 2H),  $\delta$  3.83 (d,  $J$  = 2.1 Hz, 6H).  $^{13}\text{C}$  NMR (101 MHz,  $\text{CDCl}_3$ )  $\delta$  162.68 (d,  $J$  = 3.0 Hz), 156.70 (d,  $J$  = 8.3 Hz), 149.12 (s), 136.84 (s), 133.71 (dd,  $J$  = 27.9, 11.4 Hz), 123.33 (s), 122.76 (s), 121.90 (s), 121.49 (s), 114.05 (t,  $J$  = 15.9 Hz), 66.59 (d,  $J$  = 5.2 Hz), 55.33 (s).  $^{31}\text{P}$  NMR (162 MHz,  $\text{CDCl}_3$ )  $\delta$  33.82 (s). HRMS (ESI):  $[\text{M}+\text{H}]^+$  calcd for  $\text{C}_{20}\text{H}_{20}\text{NO}_4\text{P}$  370.1203, found 370.1204.



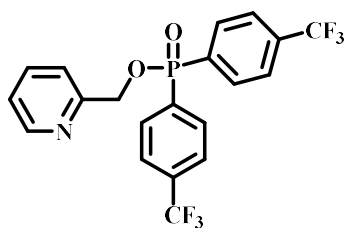

**pyridin-2-ylmethyl bis(4-(trifluoromethyl)phenyl)phosphinate (3ad)**

Compound 3ad was isolated in 67% yield;  $^1\text{H}$  NMR (400 MHz,  $\text{CDCl}_3$ )  $\delta$  8.57 (d,  $J$  = 4.3 Hz, 1H), 8.02 (dd,  $J$  = 12.1, 8.0 Hz, 2H), 7.81 – 7.67 (m, 2H), 7.51 (t,  $J$  = 11.5 Hz, 1H), 7.26 (dd,  $J$  = 7.0, 5.1 Hz, 1H), 5.22 (d,  $J$  = 8.0 Hz, 1H).  $^{13}\text{C}$  NMR (101 MHz,  $\text{CDCl}_3$ )  $\delta$  155.32 (d,  $J$  = 7.6 Hz), 149.49 (s), 136.96 (s), 134.45 (ddd,  $J$  = 53.5, 32.8, 25.7 Hz), 132.26 (d,  $J$  = 10.6 Hz), 125.67 (dq,  $J$  = 13.4, 3.7 Hz), 124.73 (s), 123.29 (s), 121.99 (s), 65.15 (t,  $J$  = 362.7 Hz).  $^{19}\text{F}$  NMR (376 MHz,  $\text{CDCl}_3$ )  $\delta$  -59.38 – -73.33 (m).  $^{31}\text{P}$  NMR (162 MHz,  $\text{CDCl}_3$ )  $\delta$  29.04 (s). HRMS (ESI):  $[\text{M}+\text{H}]^+$  calcd for  $\text{C}_{20}\text{H}_{14}\text{F}_6\text{NO}_2\text{P}$  446.0739, found 446.0740.

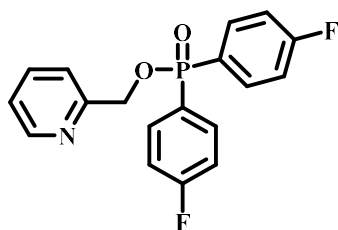

**pyridin-2-ylmethyl bis(4-fluorophenyl)phosphinate (3ae)**

Compound 3ae was isolated in 74% yield;  $^1\text{H}$  NMR (400 MHz,  $\text{CDCl}_3$ )  $\delta$  8.56 (d,  $J$  = 4.5 Hz, 1H), 7.86 (ddd,  $J$  = 12.0, 8.5, 5.7 Hz, 4H), 7.71 (t,  $J$  = 7.7 Hz, 1H), 7.51 (t,  $J$  = 9.6 Hz, 1H), 7.26 – 7.21 (m, 1H), 7.16 (td,  $J$  = 8.6, 2.3 Hz, 4H), 5.15 (d,  $J$  = 7.7 Hz, 2H).  $^{13}\text{C}$  NMR (101 MHz,  $\text{CDCl}_3$ )  $\delta$  166.62 (d,  $J$  = 3.6 Hz), 164.09 (d,  $J$  = 3.5 Hz), 155.95 (d,  $J$  = 8.0 Hz), 149.36 (s), 136.93 (s), 134.29 (dd,  $J$  = 11.7, 8.9 Hz), 127.60 (d,  $J$  = 3.5 Hz), 126.19 (d,  $J$  = 3.3 Hz), 123.07 (s), 121.77 (s), 116.14 (dd,  $J$  = 21.5, 14.5 Hz), 67.05 (d,  $J$  = 5.4 Hz).  $^{19}\text{F}$  NMR (376 MHz,  $\text{CDCl}_3$ )  $\delta$  -105.54 (d,  $J$  = 1.0 Hz).  $^{31}\text{P}$  NMR (162 MHz,  $\text{CDCl}_3$ )  $\delta$  31.14 (s). HRMS (ESI):  $[\text{M}+\text{H}]^+$  calcd for  $\text{C}_{18}\text{H}_{14}\text{F}_2\text{NO}_2\text{P}$  346.0803, found 346.0796.

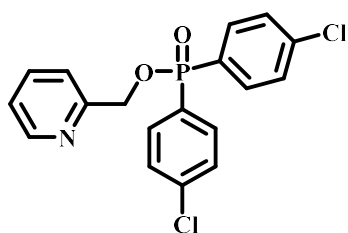

**pyridin-2-ylmethyl bis(4-chlorophenyl)phosphinate (3af)**

Compound 3af was isolated in 76% yield;  $^1\text{H}$  NMR (400 MHz,  $\text{CDCl}_3$ )  $\delta$  8.56 (d,  $J$  = 4.5 Hz, 1H), 7.78 (dd,  $J$  = 11.9, 8.3 Hz, 4H), 7.71 (t,  $J$  = 7.7 Hz, 1H), 7.51 – 7.41 (m, 5H), 7.26 – 7.20 (m, 1H), 5.16 (d,  $J$  = 7.7 Hz, 2H).  $^{13}\text{C}$  NMR (101 MHz,  $\text{CDCl}_3$ )  $\delta$  155.78 (d,  $J$  = 7.9 Hz), 149.39 (s), 139.24 (d,  $J$  = 3.6 Hz), 136.95 (s), 133.10 (d,  $J$  = 11.1 Hz), 129.88 (s), 129.14 (d,  $J$  = 13.9 Hz), 128.49 (s), 123.12 (s), 121.81 (s), 67.16 (d,  $J$  = 5.4 Hz).  $^{31}\text{P}$  NMR (162 MHz,  $\text{CDCl}_3$ )  $\delta$  31.01(s). **HRMS (ESI):**  $[\text{M}+\text{H}]^+$  calcd for  $\text{C}_{18}\text{H}_{14}\text{Cl}_2\text{NO}_2\text{P}$  378.0212, found 378.0209.

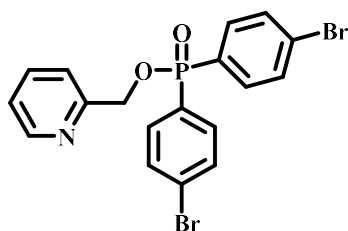

**pyridin-2-ylmethyl bis(4-bromophenyl)phosphinate (3ag)**

Compound 3ag was isolated in 76% yield;  $^1\text{H}$  NMR (400 MHz,  $\text{CDCl}_3$ )  $\delta$  8.56 (d,  $J$  = 4.5 Hz, 1H), 7.71 (dd,  $J$  = 12.0, 8.4 Hz, 5H), 7.61 (dd,  $J$  = 8.4, 3.0 Hz, 4H), 7.48 (d,  $J$  = 7.8 Hz, 1H), 7.24 (dd,  $J$  = 7.2, 5.1 Hz, 1H), 5.16 (d,  $J$  = 7.7 Hz, 2H).  $^{13}\text{C}$  NMR (101 MHz,  $\text{CDCl}_3$ )  $\delta$  155.74 (d,  $J$  = 8.0 Hz), 149.39 (s), 136.98 (s), 133.19 (d,  $J$  = 11.1 Hz), 132.10 (d,  $J$  = 13.8 Hz), 130.33 (s), 128.95 (s), 127.91 (d,  $J$  = 3.7 Hz), 123.15 (s), 121.84 (s), 67.17 (d,  $J$  = 5.4 Hz).  $^{31}\text{P}$  NMR (162 MHz,  $\text{CDCl}_3$ )  $\delta$  31.27 (s). **HRMS (ESI):**  $[\text{M}+\text{H}]^+$  calcd for  $\text{C}_{18}\text{H}_{14}\text{Br}_2\text{NO}_2\text{P}$  465.9202, found 465.9213.

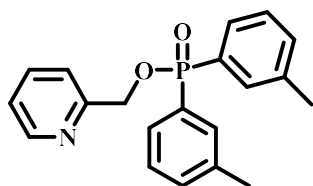

**pyridin-2-ylmethyl di-m-tolylphosphinate (3ah)**

Compound 3ah was isolated in 63% yield;  $^1\text{H}$  NMR (400 MHz,  $\text{CDCl}_3$ )  $\delta$  8.54 (s, 1H), 7.73 – 7.61 (m, 5H), 7.56 (d,  $J$  = 7.8 Hz, 1H), 7.36 – 7.31 (m, 4H), 7.21 (dd,  $J$  = 6.9, 5.1 Hz, 1H), 5.16 (d,  $J$  = 7.6 Hz, 2H), 2.37 (s, 6H).  $^{13}\text{C}$  NMR (101 MHz,  $\text{CDCl}_3$ )  $\delta$  156.53 (d,  $J$  = 8.0 Hz), 149.07 (s), 138.48 (d,  $J$  = 13.2 Hz), 136.88 (s), 133.14 (d,  $J$  = 2.9 Hz), 132.20 (d,  $J$  = 10.3 Hz), 131.59 (s), 130.23 (s), 128.63 (dd,  $J$  = 22.1, 12.0 Hz), 122.85 (s), 121.69 (s), 66.82 (d,  $J$  = 5.4 Hz), 21.37 (s).  $^{31}\text{P}$  NMR (162 MHz,  $\text{CDCl}_3$ )  $\delta$  35.90 (s). HRMS (ESI):  $[\text{M}+\text{H}]^+$  calcd for  $\text{C}_{20}\text{H}_{20}\text{NO}_2\text{P}$  338.1304, found 338.1304.

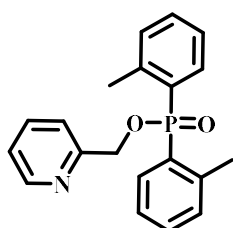**pyridin-2-ylmethyl di-o-tolylphosphinate(3ai)**

Compound 3ai was isolated in 21% yield;  $^1\text{H}$  NMR (400 MHz,  $\text{CDCl}_3$ )  $\delta$  8.55 (d,  $J$  = 4.7 Hz, 1H), 8.05 – 7.90 (m, 2H), 7.71 (td,  $J$  = 7.7, 1.7 Hz, 1H), 7.56 (d,  $J$  = 7.8 Hz, 1H), 7.49 – 7.37 (m, 2H), 7.30 (td,  $J$  = 7.5, 2.6 Hz, 2H), 7.21 (dd,  $J$  = 13.0, 8.0 Hz, 3H), 5.15 (d,  $J$  = 7.3 Hz, 2H), 2.36 (s, 6H).  $^{13}\text{C}$  NMR (101 MHz,  $\text{CDCl}_3$ )  $\delta$  156.54 (d,  $J$  = 8.2 Hz), 149.22 (s), 141.74 (d,  $J$  = 11.3 Hz), 136.86 (s), 133.61 (d,  $J$  = 9.9 Hz), 132.45 (d,  $J$  = 2.7 Hz), 131.50 (d,  $J$  = 12.7 Hz), 130.19 (s), 128.88 (s), 125.64 (d,  $J$  = 12.7 Hz), 122.85 (s), 121.83 (s), 66.57 (d,  $J$  = 5.1 Hz), 21.25 (d,  $J$  = 4.3 Hz).  $^{31}\text{P}$  NMR (121 MHz,  $\text{CDCl}_3$ )  $\delta$  34.1 (s). HRMS (ESI):  $[\text{M}+\text{H}]^+$  calcd for  $\text{C}_{20}\text{H}_{20}\text{NO}_2\text{P}$  338.1304, found 338.1301.

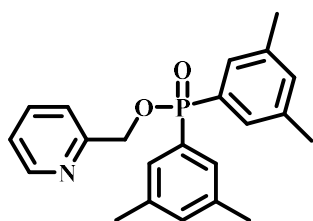**pyridin-2-ylmethyl bis(3,5-dimethylphenyl)phosphinate (3aj)**

Compound 3aj was isolated in 45% yield;  $^1\text{H}$  NMR (400 MHz,  $\text{CDCl}_3$ )  $\delta$  8.69 – 8.39 (m, 1H), 7.72 (td,  $J = 7.7, 1.7$  Hz, 1H), 7.58 (d,  $J = 7.8$  Hz, 1H), 7.50 (d,  $J = 12.6$  Hz, 4H), 7.25 – 7.20 (m, 1H), 7.16 (s, 2H), 5.17 (d,  $J = 7.7$  Hz, 2H), 2.34 (s, 12H).  $^{13}\text{C}$  NMR (101 MHz,  $\text{CDCl}_3$ )  $\delta$  156.69 (d,  $J = 7.8$  Hz), 149.08 (s), 138.30 (d,  $J = 13.9$  Hz), 136.82 (s), 134.06 (d,  $J = 3.0$  Hz), 131.50 (s), 130.15 (s), 129.25 (d,  $J = 10.2$  Hz), 122.78 (s), 121.66 (s), 66.80 (d,  $J = 5.4$  Hz), 21.28 (s).  $^{31}\text{P}$  NMR (162 MHz,  $\text{CDCl}_3$ )  $\delta$  34.38 (s). **HRMS (ESI):**  $[\text{M}+\text{H}]^+$  calcd for  $\text{C}_{22}\text{H}_{24}\text{NO}_2\text{P}$  366.1617, found 366.1612.

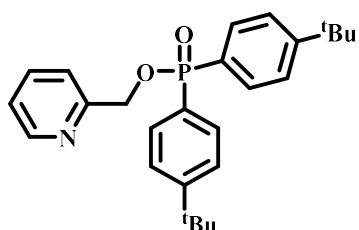

**pyridin-2-ylmethyl bis(4-(tert-butyl)phenyl)phosphinate (3ak)**

Compound 3ak was isolated in 90% yield;  $^1\text{H}$  NMR (400 MHz,  $\text{CDCl}_3$ )  $\delta$  8.53 (d,  $J = 4.7$  Hz, 1H), 7.80 (dd,  $J = 12.0, 8.2$  Hz, 4H), 7.74 – 7.67 (m, 1H), 7.57 (d,  $J = 7.8$  Hz, 1H), 7.47 (dd,  $J = 8.3, 3.2$  Hz, 4H), 7.24 – 7.17 (m, 1H), 5.14 (d,  $J = 7.3$  Hz, 2H), 1.31 (s, 18H).  $^{13}\text{C}$  NMR (101 MHz, DMSO)  $\delta$  152.02 (d,  $J = 8.4$  Hz), 150.98 (d,  $J = 2.9$  Hz), 144.34 (s), 132.08 (s), 126.87 (d,  $J = 10.6$  Hz), 123.91 (s), 122.52 (s), 120.86 (d,  $J = 13.4$  Hz), 117.98 (s), 116.77 (s), 61.95 (d,  $J = 5.3$  Hz), 30.28 (s), 26.34 (s).  $^{31}\text{P}$  NMR (162 MHz,  $\text{CDCl}_3$ )  $\delta$  33.77 (s). **HRMS (ESI):**  $[\text{M}+\text{H}]^+$  calcd for  $\text{C}_{26}\text{H}_{32}\text{NO}_2\text{P}$  422.2243, found 422.2242.

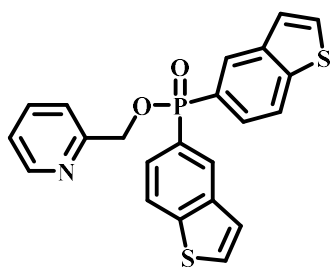

**pyridin-2-ylmethyl bis(benzo[b]thiophen-5-yl)phosphinate (3al)**

Compound 3al was isolated in 53% yield;  $^1\text{H}$  NMR (400 MHz,  $\text{CDCl}_3$ )  $\delta$  8.58 – 8.50 (m, 1H), 8.43 (d,  $J$  = 13.4 Hz, 2H), 7.95 (dd,  $J$  = 8.3, 2.8 Hz, 2H), 7.79 (dd,  $J$  = 10.3, 9.2 Hz, 2H), 7.75 – 7.65 (m, 1H), 7.58 (d,  $J$  = 7.8 Hz, 1H), 7.50 (dd,  $J$  = 5.3, 3.7 Hz, 2H), 7.37 (dt,  $J$  = 12.0, 5.9 Hz, 2H), 7.24 – 7.14 (m, 1H), 5.23 (d,  $J$  = 7.5 Hz, 2H).  $^{13}\text{C}$  NMR (101 MHz,  $\text{CDCl}_3$ )  $\delta$  156.44 (d,  $J$  = 8.1 Hz), 149.23 (s), 143.64 (d,  $J$  = 2.9 Hz), 139.32 (d,  $J$  = 15.1 Hz), 136.89 (s), 128.23 – 127.63 (m), 127.55 (s), 126.38 – 125.71 (m), 124.20 (s), 122.98 (d,  $J$  = 14.7 Hz), 121.73 (s), 67.04 (d,  $J$  = 5.4 Hz).  $^{31}\text{P}$  NMR (162 MHz,  $\text{CDCl}_3$ )  $\delta$  34.58 (s). HRMS (ESI):  $[\text{M}+\text{H}]^+$  calcd for  $\text{C}_{22}\text{H}_{16}\text{NO}_2\text{PS}_2$  422.0433, found 422.0433.

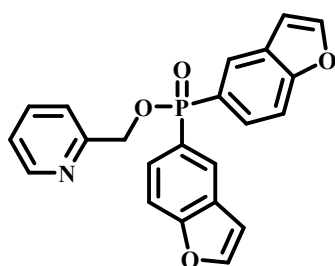

**pyridin-2-ylmethyl di(benzofuran-5-yl)phosphinate (3am)**

Compound 3am was isolated in 67% yield;  $^1\text{H}$  NMR (400 MHz,  $\text{CDCl}_3$ )  $\delta$  8.64 – 8.51 (m, 1H), 8.24 (dd,  $J$  = 12.8, 0.9 Hz, 2H), 7.84 (ddd,  $J$  = 11.6, 8.5, 1.4 Hz, 2H), 7.77 – 7.67 (m, 3H), 7.65 – 7.55 (m, 3H), 7.23 (dd,  $J$  = 7.0, 5.4 Hz, 1H), 6.91 – 6.79 (m, 2H), 5.22 (d,  $J$  = 7.4 Hz, 2H).  $^{13}\text{C}$  NMR (101 MHz,  $\text{CDCl}_3$ )  $\delta$  156.93 (d,  $J$  = 3.0 Hz), 156.54 (d,  $J$  = 8.2 Hz), 149.20 (s), 146.29 (s), 136.88 (s), 124.87 (s), 122.87 (s), 121.67 (s), 106.88 (s), 66.91 (d,  $J$  = 5.3 Hz).  $^{31}\text{P}$  NMR (162 MHz,  $\text{CDCl}_3$ )  $\delta$  34.81 (s). HRMS (ESI):  $[\text{M}+\text{H}]^+$  calcd for  $\text{C}_{22}\text{H}_{16}\text{NO}_4\text{P}$  390.0890, found 390.0888.

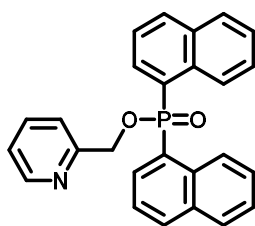

**pyridin-2-ylmethyl di(naphthalen-1-yl)phosphinate(3an)**

Compound 3an was isolated in 76% yield;  $^1\text{H}$  NMR (400 MHz,  $\text{CDCl}_3$ )  $\delta$  8.68 – 8.59 (m, 2H), 8.45 (dd,  $J$  = 15.9, 4.8 Hz, 1H), 8.21 (ddd,  $J$  = 15.9, 7.1, 1.1 Hz, 2H), 8.01 (d,  $J$  = 8.2 Hz, 2H), 7.84 (dd,  $J$  = 15.6, 8.4 Hz, 2H), 7.60 (t,  $J$  = 7.7 Hz, 1H), 7.47 (ddd,  $J$  = 14.8, 13.5, 7.4 Hz, 7H), 7.12 (dd,  $J$  = 12.7, 6.5 Hz, 1H), 5.27 (d,  $J$  = 7.4 Hz, 2H).  $^{13}\text{C}$  NMR (101 MHz,  $\text{CDCl}_3$ )  $\delta$  156.38 (d,  $J$  = 8.4 Hz), 149.15 (s), 136.76 (s), 134.16 (d,  $J$  = 10.4 Hz), 133.88 – 133.49 (m), 133.00 (d,  $J$  = 10.5 Hz), 128.95 (d,  $J$  = 1.5 Hz), 128.11 (s), 127.55 (s), 126.79 (s), 126.55 (d,  $J$  = 4.9 Hz), 126.43 (s), 124.72 (d,  $J$  = 15.0 Hz), 122.80 (s), 121.71 (s), 67.13 (d,  $J$  = 5.3 Hz).  $^{31}\text{P}$  NMR (162 MHz,  $\text{CDCl}_3$ )  $\delta$  35.72 (s). HRMS (ESI):  $[\text{M}+\text{H}]^+$  calcd for  $\text{C}_{26}\text{H}_{20}\text{NO}_2\text{P}$  410.1304, found 410.1306.

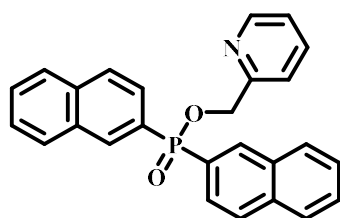

**pyridin-2-ylmethyl di(naphthalen-2-yl)phosphinate (3ao)**

Compound 3ao was isolated in 88% yield;  $^1\text{H}$  NMR (400 MHz,  $\text{CDCl}_3$ )  $\delta$  8.56 (t,  $J$  = 9.9 Hz, 3H), 7.96 – 7.78 (m, 8H), 7.69 (td,  $J$  = 7.7, 1.7 Hz, 1H), 7.64 – 7.48 (m, 5H), 7.19 (dd,  $J$  = 6.7, 5.3 Hz, 1H), 5.27 (d,  $J$  = 7.6 Hz, 2H).  $^{13}\text{C}$  NMR (101 MHz,  $\text{CDCl}_3$ )  $\delta$  156.41 (d,  $J$  = 8.0 Hz), 149.26 (s), 136.92 (s), 134.96 (d,  $J$  = 2.4 Hz), 134.04 (d,  $J$  = 10.0 Hz), 132.48 (d,  $J$  = 14.5 Hz), 129.05 (s), 128.82 (s), 128.70 (s), 128.57 (s), 128.41 (s), 127.86 (s), 127.45 (s), 127.00 (s), 126.34 (d,  $J$  = 10.8 Hz), 122.94 (s), 121.75 (s), 67.13 (d,  $J$  = 5.4 Hz).  $^{31}\text{P}$  NMR (162 MHz,  $\text{CDCl}_3$ )  $\delta$  33.39 (s). HRMS (ESI):  $[\text{M}+\text{H}]^+$  calcd for  $\text{C}_{26}\text{H}_{20}\text{NO}_2\text{P}$  410.1304, found 410.1300.

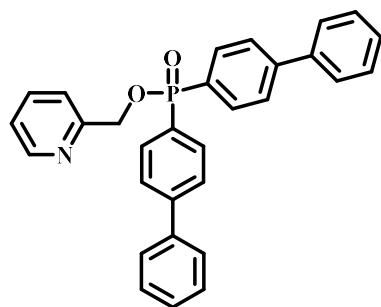

**pyridin-2-ylmethyl di([1,1'-biphenyl]-4-yl)phosphinate (3ap)**

Compound 3ap was isolated in 91% yield;  $^1\text{H}$  NMR (400 MHz,  $\text{CDCl}_3$ )  $\delta$  8.34 (d,  $J$  = 4.6 Hz, 1H), 7.76 (dd,  $J$  = 12.0, 8.3 Hz, 4H), 7.50 (ddd,  $J$  = 11.3, 8.0, 2.4 Hz, 5H), 7.41 – 7.34 (m, 5H), 7.24 (t,  $J$  = 7.5 Hz, 4H), 7.17 (t,  $J$  = 7.3 Hz, 2H), 7.03 – 6.97 (m, 1H), 5.01 (d,  $J$  = 7.5 Hz, 2H).  $^{13}\text{C}$  NMR (101 MHz,  $\text{CDCl}_3$ )  $\delta$  156.47 (d,  $J$  = 8.1 Hz), 149.26 (s), 145.22 (d,  $J$  = 2.9 Hz), 139.93 (s), 136.91 (s), 132.28 (d,  $J$  = 10.5 Hz), 130.34 (s), 128.98 (s), 128.22 (s), 127.78 – 126.69 (m), 122.92 (s), 121.71 (s), 67.00 (d,  $J$  = 5.4 Hz).  $^{31}\text{P}$  NMR (162 MHz,  $\text{CDCl}_3$ )  $\delta$  33.07 (s). HRMS (ESI):  $[\text{M}+\text{H}]^+$  calcd for  $\text{C}_{30}\text{H}_{24}\text{NO}_2\text{P}$  462.1617, found 462.1622.

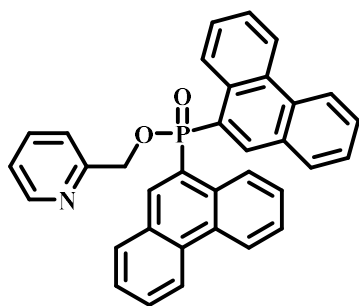

**pyridin-2-ylmethyl di(phenanthren-9-yl)phosphinate (3aq)**

Compound 3aq was isolated in 47% yield;  $^1\text{H}$  NMR (400 MHz,  $\text{CDCl}_3$ )  $\delta$  8.75 – 8.68 (m, 7H), 8.63 (s, 1H), 8.50 (d,  $J$  = 4.8 Hz, 1H), 7.92 (d,  $J$  = 7.8 Hz, 1H), 7.81 – 7.71 (m, 2H), 7.62 (dd,  $J$  = 14.6, 7.3 Hz, 2H), 7.56 – 7.47 (m, 5H), 7.20 – 7.11 (m, 3H),  $\delta$  7.22 – 7.08 (m, 1H), 5.36 (d,  $J$  = 7.9 Hz, 2H).  $^{13}\text{C}$  NMR (101 MHz,  $\text{CDCl}_3$ )  $\delta$  156.30 (d,  $J$  = 7.9 Hz), 149.20 (s), 137.57 (d,  $J$  = 10.1 Hz), 136.75 (s), 132.42 (d,  $J$  = 2.5 Hz), 130.65 (d,  $J$  = 10.2 Hz), 130.28 (t,  $J$  = 5.2 Hz), 130.05 (d,  $J$  = 15.6 Hz), 129.34 (s), 129.34 (s), 127.53 (d,  $J$  = 4.6 Hz), 127.39 (s), 127.15 (d,  $J$  = 2.6 Hz), 126.96 (s), 125.63 (s), 123.16 (s), 122.85 (s), 122.66 (s), 121.93 (s), 67.37 (d,  $J$  = 5.4 Hz).  $^{31}\text{P}$  NMR (162 MHz,  $\text{CDCl}_3$ )  $\delta$  35.86 (s). HRMS (ESI):  $[\text{M}+\text{H}]^+$  calcd for  $\text{C}_{34}\text{H}_{24}\text{NO}_2\text{P}$  510.1617, found 510.1612.

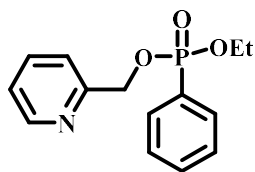

**ethyl (pyridin-2-ylmethyl) phenylphosphonate (3ar)**

Compound 3ar was isolated in 70% yield;  $^1\text{H}$  NMR (400 MHz,  $\text{CDCl}_3$ )  $\delta$  8.54 (d,  $J$  = 4.7 Hz, 1H), 7.91 – 7.81 (m, 2H), 7.70 (td,  $J$  = 7.7, 1.5 Hz, 1H), 7.60 – 7.53 (m, 1H), 7.48 (dt,  $J$  = 11.7, 5.8 Hz, 3H), 7.21 (dd,  $J$  = 7.2, 5.1 Hz, 1H), 5.18 (qd,  $J$  = 13.2, 7.6 Hz, 2H), 4.42 – 3.99 (m, 2H), 1.34 (t,  $J$  = 7.1 Hz, 3H).  $^{13}\text{C}$  NMR (101 MHz,  $\text{CDCl}_3$ )  $\delta$  156.30 (d,  $J$  = 8.3 Hz), 149.17 (s), 136.84 (s), 132.63 (d,  $J$  = 3.1 Hz), 131.85 (d,  $J$  = 10.0 Hz), 128.56 (d,  $J$  = 15.2 Hz), 126.78 (s), 122.83 (s), 121.30 (s), 67.76 (d,  $J$  = 5.0 Hz), 62.51 (d,  $J$  = 5.6 Hz), 16.35 (d,  $J$  = 6.4 Hz).  $^{31}\text{P}$  NMR (162 MHz,  $\text{CDCl}_3$ )  $\delta$  19.38 (s). **HRMS (ESI):**  $[\text{M}+\text{H}]^+$  calcd for  $\text{C}_{14}\text{H}_{16}\text{NO}_2\text{P}$  278.0941, found 278.0947.

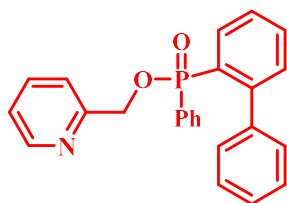

**pyridin-2-ylmethyl [1,1'-biphenyl]-2-yl(phenyl)phosphinate (3as)**

Compound 3as was isolated in 68% yield;  $^1\text{H}$  NMR (400 MHz,  $\text{CDCl}_3$ )  $\delta$  8.63 (d,  $J$  = 4.3 Hz, 1H), 8.28 (ddd,  $J$  = 13.0, 7.7, 1.1 Hz, 1H), 7.78 (td,  $J$  = 7.7, 1.7 Hz, 1H), 7.69 (tt,  $J$  = 7.5, 1.4 Hz, 1H), 7.60 (tdd,  $J$  = 7.6, 2.7, 1.3 Hz, 1H), 7.48 (ddd,  $J$  = 11.0, 10.1, 7.5 Hz, 4H), 7.39 – 7.30 (m, 5H), 7.25 (q,  $J$  = 7.8 Hz, 4H), 5.17 (dd,  $J$  = 13.2, 7.4 Hz, 1H), 5.07 (dd,  $J$  = 13.2, 7.2 Hz, 1H).  $^{13}\text{C}$  NMR (101 MHz,  $\text{CDCl}_3$ )  $\delta$  156.59 (d,  $J$  = 8.3 Hz), 149.01 (s), 146.53 (d,  $J$  = 11.6 Hz), 140.45 (d,  $J$  = 4.3 Hz), 136.75 (s), 133.01 (d,  $J$  = 9.0 Hz), 131.99 (d,  $J$  = 2.8 Hz), 131.77 – 131.64 (m), 131.57 (d,  $J$  = 6.7 Hz), 131.42 (s), 130.63 (d,  $J$  = 7.7 Hz), 129.76 (s), 128.02 (d,  $J$  = 13.4 Hz), 127.33 (d,  $J$  = 10.0 Hz), 126.85 (d,  $J$  = 12.4 Hz), 122.69 (s), 121.57 (s), 66.47 (d,  $J$  = 5.0 Hz).  $^{31}\text{P}$  NMR (162 MHz,  $\text{CDCl}_3$ )  $\delta$  33.10 (s). **HRMS (ESI):**  $[\text{M}+\text{H}]^+$  calcd for  $\text{C}_{24}\text{H}_{20}\text{NO}_2\text{P}$  386.1304, found 386.1305.



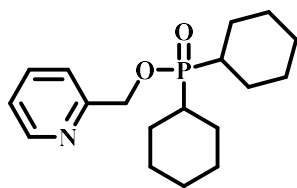

**pyridin-2-ylmethyl dicyclohexylphosphinate (3at)**

Compound 3at was isolated in 77% yield;  $^1\text{H}$  NMR (400 MHz,  $\text{CDCl}_3$ )  $\delta$  8.57 (t,  $J$  = 6.7 Hz, 1H), 7.73 (td,  $J$  = 7.7, 1.6 Hz, 1H), 7.60 – 7.42 (m, 1H), 7.23 (dd,  $J$  = 7.2, 5.1 Hz, 1H), 5.16 (d,  $J$  = 6.9 Hz, 2H),  $\delta$  1.99 (d,  $J$  = 12.0 Hz, 2H), 1.85 (ddd,  $J$  = 14.1, 8.8, 3.0 Hz, 8H), 1.71 (s, 2H), 1.54 – 1.34 (m, 4H), 1.23 (t,  $J$  = 8.1 Hz, 6H).  $^{13}\text{C}$  NMR (101 MHz,  $\text{CDCl}_3$ )  $\delta$  157.30 (d,  $J$  = 6.5 Hz), 149.25 (s), 136.80 (s), 122.74 (s), 121.56 (s), 66.77 (d,  $J$  = 6.5 Hz), 36.59 (s), 35.72 (s), 26.56 – 26.10 (m), 25.90 (d,  $J$  = 1.4 Hz), 25.43 (dd,  $J$  = 5.2, 3.4 Hz).  $^{31}\text{P}$  NMR (162 MHz,  $\text{CDCl}_3$ )  $\delta$  60.33 (s). **HRMS (ESI):**  $[\text{M}+\text{H}]^+$  calcd for  $\text{C}_{18}\text{H}_{28}\text{NO}_2\text{P}$  322.1930, found 322.1924.

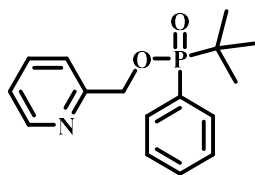

**pyridin-2-ylmethyl tert-butyl(phenyl)phosphinate (3au)**

Compound 3au was isolated in 65% yield;  $^1\text{H}$  NMR (400 MHz,  $\text{CDCl}_3$ )  $\delta$  8.56 (d,  $J$  = 4.5 Hz, 1H), 7.80 (dd,  $J$  = 9.4, 8.0 Hz, 2H), 7.74 (td,  $J$  = 7.7, 1.5 Hz, 1H), 7.56 (t,  $J$  = 6.0 Hz, 2H), 7.47 (td,  $J$  = 7.4, 3.1 Hz, 2H), 7.23 (dd,  $J$  = 7.0, 5.2 Hz, 2H), 5.23 (dd,  $J$  = 13.2, 7.3 Hz, 1H), 4.94 (dd,  $J$  = 13.2, 6.6 Hz, 1H), 1.31 – 1.07 (m, 9H).  $^{13}\text{C}$  NMR (101 MHz,  $\text{CDCl}_3$ )  $\delta$  156.95 (d,  $J$  = 7.4 Hz), 149.17 (s), 136.84 (s), 133.22 (d,  $J$  = 8.9 Hz), 132.24 (d,  $J$  = 2.6 Hz), 128.38 (d,  $J$  = 11.7 Hz), 127.28 (s), 122.77 (s), 121.45 (s), 66.65 (d,  $J$  = 6.7 Hz), 33.34 (s), 32.35 (s), 24.31 (s).  $^{31}\text{P}$  NMR (162 MHz,  $\text{CDCl}_3$ )  $\delta$  52.83 (s). **HRMS (ESI):**  $[\text{M}+\text{H}]^+$  calcd for  $\text{C}_{30}\text{H}_{24}\text{NO}_2\text{P}$  290.1304, found 290.1309.

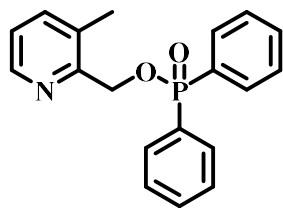

**(3-methylpyridin-2-yl)methyl diphenylphosphinate (3ba)**

Compound 3ba was isolated in 32% yield;  $^1\text{H}$  NMR (400 MHz,  $\text{CDCl}_3$ )  $\delta$  8.42 (d,  $J$  = 4.1 Hz, 1H), 7.91 – 7.73 (m, 4H), 7.51 (dt,  $J$  = 15.3, 4.4 Hz, 3H), 7.43 (td,  $J$  = 7.4, 3.5 Hz, 4H), 7.18 (dd,  $J$  = 7.6, 4.8 Hz, 1H), 5.20 (d,  $J$  = 6.5 Hz, 2H), 2.42 (s, 3H).  $^{13}\text{C}$  NMR (101 MHz,  $\text{CDCl}_3$ )  $\delta$  153.56 (d,  $J$  = 8.5 Hz), 146.80 (s), 138.43 (s), 133.24 (s), 132.23 (d,  $J$  = 2.8 Hz), 131.80 (t,  $J$  = 8.2 Hz), 130.52 (s), 128.54 (d,  $J$  = 13.2 Hz), 123.73 (s), 66.21 (d,  $J$  = 5.6 Hz), 18.21 (s).  $^{31}\text{P}$  NMR (162 MHz,  $\text{CDCl}_3$ )  $\delta$  32.58 (s). **HRMS (ESI):**  $[\text{M}+\text{H}]^+$  calcd for  $\text{C}_{19}\text{H}_{18}\text{NO}_2\text{P}$  324.1148, found 324.1159.

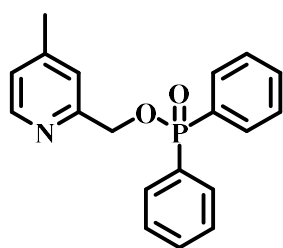

**(4-methylpyridin-2-yl)methyl diphenylphosphinate (3bb)**

Compound 3bb was isolated in 92% yield;  $^1\text{H}$  NMR (400 MHz,  $\text{CDCl}_3$ )  $\delta$  8.39 (d,  $J$  = 5.0 Hz, 1H), 7.93 – 7.79 (m, 4H), 7.53 (dd,  $J$  = 10.5, 4.3 Hz, 2H), 7.46 (td,  $J$  = 7.3, 3.5 Hz, 4H), 7.33 (s, 1H), 7.02 (d,  $J$  = 4.9 Hz, 1H), 5.13 (d,  $J$  = 7.5 Hz, 2H), 2.34 (s, 3H).  $^{13}\text{C}$  NMR (101 MHz,  $\text{CDCl}_3$ )  $\delta$  156.03 (d,  $J$  = 8.0 Hz), 148.98 (s), 148.13 (s), 132.35 (d,  $J$  = 2.8 Hz), 132.06 – 131.29 (m), 130.38 (s), 128.63 (d,  $J$  = 13.2 Hz), 123.88 (s), 122.61 (s), 66.98 (d,  $J$  = 5.5 Hz), 21.18 (s).  $^{31}\text{P}$  NMR (162 MHz,  $\text{CDCl}_3$ )  $\delta$  32.89 (s). **HRMS (ESI):**  $[\text{M}+\text{H}]^+$  calcd for  $\text{C}_{19}\text{H}_{18}\text{NO}_2\text{P}$  324.1148, found 324.1151.

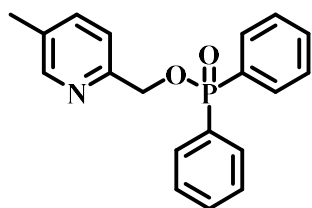

**(5-methylpyridin-2-yl)methyl diphenylphosphinate (3bc)**

Compound 3bc was isolated in 82% yield;  $^1\text{H}$  NMR (400 MHz,  $\text{CDCl}_3$ )  $\delta$  8.37 (s, 1H), 7.92 – 7.77 (m, 4H), 7.55 – 7.48 (m, 3H), 7.48 – 7.40 (m, 5H), 5.13 (d,  $J$  = 7.4 Hz, 2H), 2.26 (d,  $J$  = 41.0 Hz, 3H).  $^{13}\text{C}$  NMR (101 MHz,  $\text{CDCl}_3$ )  $\delta$  153.41 (d,  $J$  = 8.1 Hz), 149.59 (s), 137.31 (s), 132.45 (s), 132.28 (d,  $J$  = 2.8 Hz), 131.75 (t,  $J$  = 7.6 Hz), 130.46 (s), 128.59 (d,  $J$  = 13.2 Hz), 121.38 (s), 66.90 (d,  $J$  = 5.5 Hz), 18.19 (s).  $^{31}\text{P}$  NMR (162 MHz,  $\text{CDCl}_3$ )  $\delta$  32.81 (s). **HRMS (ESI):**  $[\text{M}+\text{H}]^+$  calcd for  $\text{C}_{19}\text{H}_{18}\text{NO}_2\text{P}$  324.1148, found 324.1146.

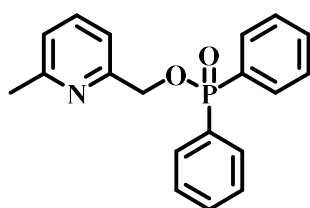

**(6-methylpyridin-2-yl)methyl diphenylphosphinate (3bd)**

Compound 3bd was isolated in 45% yield;  $^1\text{H}$  NMR (400 MHz,  $\text{CDCl}_3$ )  $\delta$  7.91 – 7.81 (m, 4H), 7.58 (t,  $J$  = 7.7 Hz, 1H), 7.54 – 7.48 (m, 2H), 7.48 – 7.40 (m, 4H), 7.35 (d,  $J$  = 7.7 Hz, 1H), 7.05 (d,  $J$  = 7.7 Hz, 1H), 5.13 (d,  $J$  = 7.5 Hz, 2H), 2.50 (s, 3H).  $^{13}\text{C}$  NMR (101 MHz,  $\text{CDCl}_3$ )  $\delta$  157.86 (s), 155.75 (d,  $J$  = 8.1 Hz), 137.04 (s), 132.30 (d,  $J$  = 2.8 Hz), 131.74 (d,  $J$  = 10.3 Hz), 130.43 (s), 128.58 (d,  $J$  = 13.2 Hz), 122.39 (s), 118.35 (s), 66.97 (d,  $J$  = 5.4 Hz), 24.29 (s).  $^{31}\text{P}$  NMR (162 MHz,  $\text{CDCl}_3$ )  $\delta$  32.71 (s). **HRMS (ESI):**  $[\text{M}+\text{H}]^+$  calcd for  $\text{C}_{19}\text{H}_{18}\text{NO}_2\text{P}$  324.1148, found 324.1139.

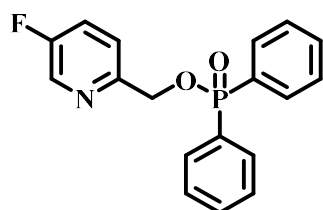

**(5-fluoropyridin-2-yl)methyl diphenylphosphinate (3be)**

Compound 3be was isolated in 67% yield;  $^1\text{H}$  NMR (400 MHz,  $\text{CDCl}_3$ )  $\delta$  8.39 (d,  $J$  = 2.8 Hz, 1H), 7.97 – 7.77 (m, 4H), 7.58 – 7.51 (m, 3H), 7.50 – 7.40 (m, 5H), 5.15 (d,  $J$  = 7.8 Hz, 2H).  $^{13}\text{C}$  NMR (101 MHz,  $\text{CDCl}_3$ )  $\delta$  160.18 (s), 157.64 (s), 152.32 (dd,  $J$  = 7.9, 3.9 Hz), 137.48 (d,  $J$  = 24.0 Hz), 132.45 (d,  $J$  = 2.8 Hz), 131.67 (t,  $J$  = 7.4 Hz),

130.25 (s), 128.68 (d,  $J = 13.2$  Hz), 123.55 (d,  $J = 18.5$  Hz), 122.96 (d,  $J = 4.5$  Hz), 68.00 – 64.42 (m).  $^{19}\text{F}$  NMR (376 MHz,  $\text{CDCl}_3$ )  $\delta$  -127.92 (s).  $^{31}\text{P}$  NMR (162 MHz,  $\text{CDCl}_3$ )  $\delta$  33.15 (s). **HRMS (ESI):**  $[\text{M}+\text{H}]^+$  + calcd for  $\text{C}_{18}\text{H}_{15}\text{FNO}_2\text{P}$  328.0897, found 328.0903.

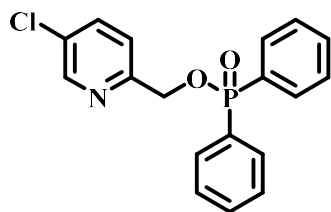

**(5-chloropyridin-2-yl)methyl diphenylphosphinate (3bf)**

Compound 3bf was isolated in 86% yield;  $^1\text{H}$  NMR (400 MHz,  $\text{CDCl}_3$ )  $\delta$  8.50 (d,  $J = 1.3$  Hz, 1H), 7.88 (dd,  $J = 11.1, 8.3$  Hz, 4H), 7.75 – 7.65 (m, 1H), 7.62 – 7.39 (m, 8H), 5.15 (dd,  $J = 7.7, 1.8$  Hz, 2H).  $^{13}\text{C}$  NMR (101 MHz,  $\text{CDCl}_3$ )  $\delta$  154.61 (d,  $J = 8.0$  Hz), 148.08 (s), 136.58 (s), 132.48 (d,  $J = 2.8$  Hz), 131.70 (d,  $J = 10.3$  Hz), 131.50 (s), 131.24 (s), 130.14 (s), 128.70 (d,  $J = 13.2$  Hz), 122.53 (s), 66.28 (d,  $J = 5.3$  Hz).  $^{31}\text{P}$  NMR (162 MHz,  $\text{CDCl}_3$ )  $\delta$  33.30 (s). **HRMS (ESI):**  $[\text{M}+\text{H}]^+$  + calcd for  $\text{C}_{18}\text{H}_{15}\text{ClNO}_2\text{P}$  344.0602, found 344.0607.

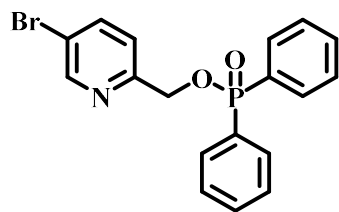

**(5-bromopyridin-2-yl)methyl diphenylphosphinate (3bg)**

Compound 3bg was isolated in 88% yield;  $^1\text{H}$  NMR (400 MHz,  $\text{CDCl}_3$ )  $\delta$  8.59 (d,  $J = 1.8$  Hz, 1H), 7.93 – 7.77 (m, 5H), 7.54 (t,  $J = 7.1$  Hz, 2H), 7.51 – 7.42 (m, 5H), 5.12 (d,  $J = 7.7$  Hz, 2H).  $^{13}\text{C}$  NMR (101 MHz,  $\text{CDCl}_3$ )  $\delta$  155.02 (d,  $J = 7.9$  Hz), 150.25 (s), 139.44 (s), 132.49 (d,  $J = 2.8$  Hz), 131.70 (d,  $J = 10.3$  Hz), 131.49 (s), 130.13 (s), 128.70 (d,  $J = 13.2$  Hz), 123.02 (s), 119.89 (s), 66.30 (d,  $J = 5.3$  Hz).  $^{31}\text{P}$  NMR (162 MHz,  $\text{CDCl}_3$ )  $\delta$  33.33 (s). **HRMS (ESI):**  $[\text{M}+\text{H}]^+$  + calcd for  $\text{C}_{18}\text{H}_{15}\text{BrNO}_2\text{P}$  388.0097,

found 388.0097.

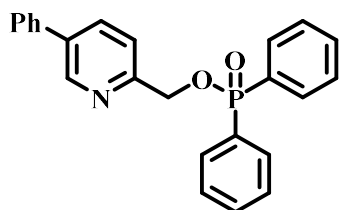

**(5-phenylpyridin-2-yl)methyl diphenylphosphinate (3bh)**

Compound 3bh was isolated in 88% yield;  $^1\text{H}$  NMR (400 MHz,  $\text{CDCl}_3$ )  $\delta$  8.80 (d,  $J$  = 1.8 Hz, 1H), 8.01 – 7.85 (m, 5H), 7.65 (d,  $J$  = 8.1 Hz, 1H), 7.61 – 7.53 (m, 4H), 7.53 – 7.47 (m, 6H), 7.43 (t,  $J$  = 7.3 Hz, 1H), 5.25 (d,  $J$  = 7.6 Hz, 2H).  $^{13}\text{C}$  NMR (101 MHz,  $\text{CDCl}_3$ )  $\delta$  155.12 (d,  $J$  = 8.0 Hz), 147.69 (s), 137.48 (s), 135.93 (s), 135.25 (s), 132.41 (d,  $J$  = 2.8 Hz), 131.76 (d,  $J$  = 10.2 Hz), 130.35 (s), 129.14 (s), 128.68 (d,  $J$  = 13.2 Hz), 128.21 (s), 127.14 (s), 121.71 (s), 66.83 (d,  $J$  = 5.4 Hz).  $^{31}\text{P}$  NMR (162 MHz,  $\text{CDCl}_3$ )  $\delta$  33.08 (s). **HRMS (ESI):**  $[\text{M}+\text{H}]^+$  calcd for  $\text{C}_{24}\text{H}_{20}\text{NO}_2\text{P}$  386.1304, found 386.1301.

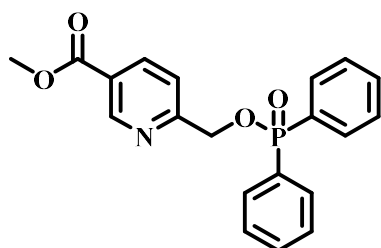

**methyl 6-(((diphenylphosphoryl)oxy)methyl)nicotinate (3bi)**

Compound 3bi was isolated in 94% yield;  $^1\text{H}$  NMR (400 MHz,  $\text{CDCl}_3$ )  $\delta$  9.13 (d,  $J$  = 1.6 Hz, 1H), 8.32 (dd,  $J$  = 8.2, 2.1 Hz, 1H), 7.96 – 7.83 (m, 4H), 7.66 (d,  $J$  = 8.2 Hz, 1H), 7.55 (td,  $J$  = 7.5, 1.3 Hz, 2H), 7.51 – 7.43 (m, 4H), 5.22 (d,  $J$  = 7.6 Hz, 2H), 4.19 – 3.45 (m, 4H).  $^{13}\text{C}$  NMR (101 MHz,  $\text{CDCl}_3$ )  $\delta$  165.50 (s), 160.86 (d,  $J$  = 8.0 Hz), 150.35 (s), 138.01 (s), 132.52 (d,  $J$  = 2.8 Hz), 131.69 (d,  $J$  = 10.3 Hz), 131.43 (s), 130.07 (s), 128.72 (d,  $J$  = 13.2 Hz), 125.14 (s), 120.75 (s), 66.44 (d,  $J$  = 5.3 Hz), 52.42 (s).  $^{31}\text{P}$  NMR (162 MHz,  $\text{CDCl}_3$ )  $\delta$  33.45 (s). **HRMS (ESI):**  $[\text{M}+\text{H}]^+$  calcd for  $\text{C}_{20}\text{H}_{18}\text{NO}_4\text{P}$  368.1046, found 368.1040.

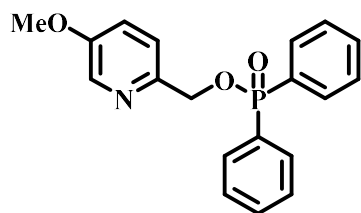

**(5-methoxypyridin-2-yl)methyl diphenylphosphinate (3bj)**

Compound 3bj was isolated in 52% yield;  $^1\text{H}$  NMR (400 MHz,  $\text{CDCl}_3$ )  $\delta$  8.24 (d,  $J$  = 2.8 Hz, 1H), 7.89 – 7.80 (m, 4H), 7.55 – 7.49 (m, 2H), 7.48 – 7.41 (m, 5H), 7.19 (dd,  $J$  = 8.6, 2.9 Hz, 1H), 5.12 (d,  $J$  = 7.6 Hz, 2H), 3.85 (s, 3H).  $^{13}\text{C}$  NMR (101 MHz,  $\text{CDCl}_3$ )  $\delta$  155.22 (s), 148.16 (d,  $J$  = 8.0 Hz), 136.99 (s), 132.29 (d,  $J$  = 2.8 Hz), 131.78 (t,  $J$  = 9.3 Hz), 130.51 (s), 128.60 (d,  $J$  = 13.2 Hz), 122.84 (s), 120.97 (s), 66.84 (d,  $J$  = 5.5 Hz), 55.65 (s).  $^{31}\text{P}$  NMR (162 MHz,  $\text{CDCl}_3$ )  $\delta$  32.71 (s). **HRMS (ESI):**  $[\text{M}+\text{H}]^+$  + calcd for  $\text{C}_{19}\text{H}_{18}\text{NO}_3\text{P}$  340.1097, found 340.1090.

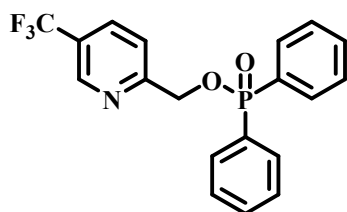

**(5-(trifluoromethyl)pyridin-2-yl)methyl diphenylphosphinate (3bk)**

Compound 3bk was isolated in 73% yield;  $^1\text{H}$  NMR (400 MHz,  $\text{CDCl}_3$ )  $\delta$  8.80 (s, 1H), 7.95 (dd,  $J$  = 8.3, 2.0 Hz, 1H), 7.93 – 7.84 (m, 4H), 7.72 (d,  $J$  = 8.2 Hz, 1H), 7.60 – 7.53 (m, 2H), 7.48 (tdd,  $J$  = 8.2, 3.5, 1.2 Hz, 4H), 5.23 (d,  $J$  = 7.8 Hz, 2H).  $^{13}\text{C}$  NMR (101 MHz,  $\text{CDCl}_3$ )  $\delta$  160.52 (d,  $J$  = 6.5 Hz), 146.09 (d,  $J$  = 4.0 Hz), 134.09 (d,  $J$  = 3.5 Hz), 132.59 (d,  $J$  = 2.8 Hz), 131.68 (d,  $J$  = 10.3 Hz), 131.34 (s), 129.97 (s), 128.75 (d,  $J$  = 13.3 Hz), 125.78 (d,  $J$  = 33.1 Hz), 124.76 (s), 122.05 (s), 121.03 (s), 66.29 (d,  $J$  = 5.2 Hz).  $^{19}\text{F}$  NMR (376 MHz,  $\text{CDCl}_3$ )  $\delta$  -54.50 – -70.75 (m).  $^{31}\text{P}$  NMR (162 MHz,  $\text{CDCl}_3$ )  $\delta$  33.64 (s). **HRMS (ESI):**  $[\text{M}+\text{H}]^+$  + calcd for  $\text{C}_{19}\text{H}_{15}\text{F}_3\text{NO}_2\text{P}$  378.0865, found 378.0855.

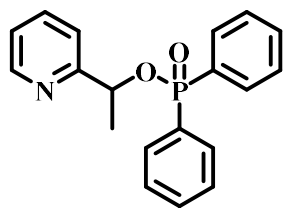

**1-(pyridin-2-yl)ethyl diphenylphosphinate (3bl)**

Compound 3bl was isolated in 63% yield;  $^1\text{H}$  NMR (400 MHz,  $\text{CDCl}_3$ )  $\delta$  8.54 – 8.48 (m, 1H), 7.93 – 7.83 (m, 2H), 7.78 – 7.70 (m, 2H), 7.65 (dd,  $J = 10.8, 4.5$  Hz, 1H), 7.56 – 7.50 (m, 1H), 7.50 – 7.42 (m, 4H), 7.35 (ddd,  $J = 5.5, 4.4, 2.1$  Hz, 2H), 7.20 – 7.13 (m, 1H), 5.57 (dq,  $J = 8.9, 6.5$  Hz, 1H), 1.70 (d,  $J = 6.5$  Hz, 3H).  $^{13}\text{C}$  NMR (101 MHz,  $\text{CDCl}_3$ )  $\delta$  160.75 (d,  $J = 5.3$  Hz), 148.98 (s), 136.77 (s), 132.66 (s), 132.17 (d,  $J = 2.8$  Hz), 132.06 (d,  $J = 2.8$  Hz), 131.69 (dd,  $J = 10.2, 6.0$  Hz), 131.29 (s), 130.79 (s), 122.66 (s), 120.48 (s), 74.93 (d,  $J = 5.5$  Hz), 23.25 (d,  $J = 3.6$  Hz).  $^{31}\text{P}$  NMR (162 MHz,  $\text{CDCl}_3$ )  $\delta$  31.47 (s). **HRMS (ESI):**  $[\text{M}+\text{H}]^+$  calcd for  $\text{C}_{19}\text{H}_{18}\text{NO}_2\text{P}$  324.1148, found 324.1143.

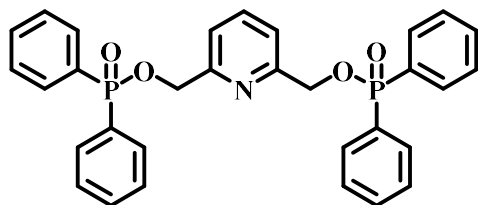

**pyridine-2,6-diylbis(methylene) bis(diphenylphosphinate) (3bm)**

Compound 3bm was isolated in 86% yield;  $^1\text{H}$  NMR (400 MHz,  $\text{CDCl}_3$ )  $\delta$  7.90 – 7.82 (m, 8H), 7.74 (t,  $J = 7.8$  Hz, 1H), 7.56 – 7.50 (m, 4H), 7.49 – 7.41 (m, 10H), 5.10 (d,  $J = 7.5$  Hz, 4H).  $^{13}\text{C}$  NMR (101 MHz,  $\text{CDCl}_3$ )  $\delta$  155.96 (d,  $J = 8.1$  Hz), 137.75 (s), 132.42 (d,  $J = 2.8$  Hz), 131.70 (t,  $J = 8.0$  Hz), 130.27 (s), 128.66 (d,  $J = 13.2$  Hz), 120.59 (s), 66.65 (d,  $J = 5.3$  Hz).  $^{31}\text{P}$  NMR (162 MHz,  $\text{CDCl}_3$ )  $\delta$  33.05 (s). **HRMS (ESI):**  $[\text{M}+\text{H}]^+$  calcd for  $\text{C}_{31}\text{H}_{27}\text{NO}_4\text{P}_2$  540.1488, found 540.1489.

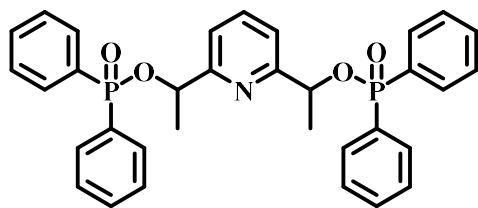

**pyridine-2,6-diylbis(ethane-1,1-diyl) bis(diphenylphosphinate) (3bn)**

Compound 3bn was isolated in 43% yield;  $^1\text{H}$  NMR (400 MHz,  $\text{CDCl}_3$ )  $\delta$  7.91 – 7.82 (m, 4H), 7.78 – 7.70 (m, 4H), 7.64 (t,  $J$  = 7.7 Hz, 1H), 7.56 – 7.49 (m, 2H), 7.49 – 7.41 (m, 6H), 7.35 (ddd,  $J$  = 9.4, 8.3, 4.8 Hz, 6H), 5.60 – 5.38 (m, 2H), 1.71 – 1.51 (m, 6H).  $^{13}\text{C}$  NMR (101 MHz,  $\text{CDCl}_3$ )  $\delta$  160.06 (t,  $J$  = 5.1 Hz), 137.59 (d,  $J$  = 10.4 Hz), 132.63 (d,  $J$  = 7.5 Hz), 132.14 (d,  $J$  = 10.4 Hz), 131.70 (ddd,  $J$  = 10.1, 4.7, 3.2 Hz), 131.26 (d,  $J$  = 7.1 Hz), 130.77 (d,  $J$  = 7.9 Hz), 128.68 – 128.08 (m), 119.09 (d,  $J$  = 5.3 Hz), 74.89 (t,  $J$  = 5.7 Hz), 23.24 (dd,  $J$  = 6.6, 3.5 Hz).  $^{31}\text{P}$  NMR (162 MHz,  $\text{CDCl}_3$ )  $\delta$  31.30 (d,  $J$  = 8.7 Hz). **HRMS (ESI):**  $[\text{M}+\text{H}]^+$  calcd for  $\text{C}_{33}\text{H}_{31}\text{NO}_4\text{P}_2$  568.1801, found 568.1785.

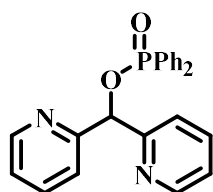

**di(pyridin-2-yl)methyl diphenylphosphinate (3bo)**

Compound 3bo was isolated in 73% yield;  $^1\text{H}$  NMR (400 MHz,  $\text{CDCl}_3$ )  $\delta$  8.47 (d,  $J$  = 4.5 Hz, 2H), 7.86 – 7.74 (m, 4H), 7.62 (q,  $J$  = 7.6 Hz, 4H), 7.46 (t,  $J$  = 7.4 Hz, 2H), 7.36 (td,  $J$  = 7.5, 3.5 Hz, 4H), 7.11 (dd,  $J$  = 8.4, 3.3 Hz, 2H), 6.58 (d,  $J$  = 10.1 Hz, 1H).  $^{13}\text{C}$  NMR (101 MHz,  $\text{CDCl}_3$ )  $\delta$  158.62 (d,  $J$  = 4.7 Hz), 149.35 (s), 136.72 (s), 132.20 (d,  $J$  = 2.8 Hz), 131.83 (t,  $J$  = 8.8 Hz), 130.55 (s), 128.39 (d,  $J$  = 13.3 Hz), 122.82 (s), 122.10 (s), 79.38 (d,  $J$  = 5.2 Hz).  $^{31}\text{P}$  NMR (162 MHz,  $\text{CDCl}_3$ )  $\delta$  32.85 (s). **HRMS (ESI):**  $[\text{M}+\text{H}]^+$  calcd for  $\text{C}_{23}\text{H}_{19}\text{N}_2\text{O}_2\text{P}$  387.1257, found 387.1262.

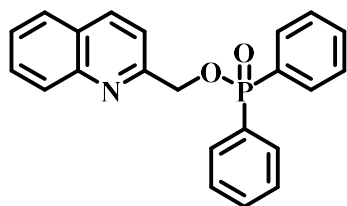



### quinolin-2-ylmethyl diphenylphosphinate (3bp)

Compound 3bp was isolated in 88% yield;  $^1\text{H}$  NMR (400 MHz,  $\text{CDCl}_3$ )  $\delta$  8.17 (d,  $J = 8.5$  Hz, 1H), 8.01 (d,  $J = 8.5$  Hz, 1H), 7.95 – 7.85 (m, 4H), 7.82 – 7.77 (m, 1H), 7.74 – 7.65 (m, 2H), 7.51 (ddd,  $J = 7.2, 4.7, 2.4$  Hz, 3H), 7.48 – 7.41 (m, 4H), 5.33 (d,  $J = 7.5$  Hz, 2H).  $^{13}\text{C}$  NMR (101 MHz,  $\text{CDCl}_3$ )  $\delta$  156.73 (d,  $J = 8.1$  Hz), 147.41 (s), 137.09 (s), 132.42 (d,  $J = 2.8$  Hz), 131.74 (t,  $J = 7.6$  Hz), 130.31 (s), 129.81 (s), 129.05 (s), 128.67 (d,  $J = 13.2$  Hz), 127.63 (d,  $J = 9.5$  Hz), 126.69 (s), 119.42 (s), 67.56 (d,  $J = 5.5$  Hz).  $^{31}\text{P}$  NMR (162 MHz,  $\text{CDCl}_3$ )  $\delta$  33.22 (s). HRMS (ESI):  $[\text{M}+\text{H}]^+$  calcd for  $\text{C}_{22}\text{H}_{18}\text{NO}_2\text{P}$  360.1148, found 360.1149.

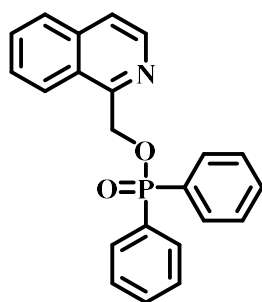

### isoquinolin-1-ylmethyl diphenylphosphinate (3bq)

Compound 3bq was isolated in 94% yield;  $^1\text{H}$  NMR (400 MHz,  $\text{CDCl}_3$ )  $\delta$  8.46 (dd,  $J = 8.5, 4.5$  Hz, 2H), 7.91 – 7.76 (m, 5H), 7.72 – 7.58 (m, 3H), 7.48 (dd,  $J = 10.3, 4.5$  Hz, 2H), 7.40 (dt,  $J = 10.4, 4.1$  Hz, 4H), 5.63 (d,  $J = 6.4$  Hz, 2H).  $^{13}\text{C}$  NMR (101 MHz,  $\text{CDCl}_3$ )  $\delta$  154.76 (d,  $J = 8.8$  Hz), 141.74 (s), 136.48 (s), 132.31 (d,  $J = 2.8$  Hz), 131.73 (t,  $J = 7.6$  Hz), 130.33 (s), 128.56 (d,  $J = 13.2$  Hz), 127.92 (s), 127.18 (s), 125.51 (s), 121.84 (s), 66.31 (d,  $J = 5.5$  Hz).  $^{31}\text{P}$  NMR (162 MHz,  $\text{CDCl}_3$ )  $\delta$  33.09 (s). HRMS (ESI):  $[\text{M}+\text{H}]^+$  calcd for  $\text{C}_{22}\text{H}_{18}\text{NO}_2\text{P}$  360.1148, found 360.1148.

## 7. X-ray crystallographic data for 3ak.

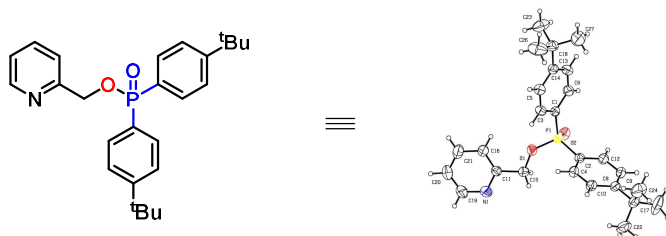

**Figure S1.** The structure of **3ak**

**Table S1.** Crystal data and structure refinement for **3ak**

|                                             |                                                               |
|---------------------------------------------|---------------------------------------------------------------|
| Identification code                         | 3ak                                                           |
| Empirical formula                           | C <sub>26</sub> H <sub>32</sub> NO <sub>2</sub> P             |
| Formula weight                              | 421.49                                                        |
| Temperature/K                               | 300.12(10)                                                    |
| Crystal system                              | monoclinic                                                    |
| Space group                                 | P2 <sub>1</sub>                                               |
| a/Å                                         | 12.3652(2)                                                    |
| b/Å                                         | 8.67120(10)                                                   |
| c/Å                                         | 23.3663(3)                                                    |
| α/°                                         | 90                                                            |
| β/°                                         | 103.9070(10)                                                  |
| γ/°                                         | 90                                                            |
| Volume/Å <sup>3</sup>                       | 2431.92(6)                                                    |
| Z                                           | 4                                                             |
| ρ <sub>calc</sub> /cm <sup>3</sup>          | 1.151                                                         |
| μ/mm <sup>-1</sup>                          | 1.155                                                         |
| F(000)                                      | 904.0                                                         |
| Crystal size/mm <sup>3</sup>                | 0.14 × 0.11 × 0.08                                            |
| Radiation                                   | Cu Kα (λ = 1.54184)                                           |
| 2θ range for data collection/°              | 9.354 to 154.844                                              |
| Index ranges                                | -15 ≤ h ≤ 15, -10 ≤ k ≤ 10, -25 ≤ l ≤ 29                      |
| Reflections collected                       | 34396                                                         |
| Independent reflections                     | 4990 [R <sub>int</sub> = 0.0616, R <sub>sigma</sub> = 0.0387] |
| Data/restraints/parameters                  | 4990/0/277                                                    |
| Goodness-of-fit on F <sup>2</sup>           | 1.044                                                         |
| Final R indexes [I ≥ 2σ (I)]                | R1 = 0.0567, wR2 = 0.1617                                     |
| Final R indexes [all data]                  | R1 = 0.0617, wR2 = 0.1669                                     |
| Largest diff. peak/hole / e Å <sup>-3</sup> | 0.40/-0.34                                                    |

Single crystals of  $C_{26}H_{32}NO_2P$  [yangjin309\_1102\_auto] were collected. A suitable crystal was selected and collected on a SuperNova, Dual, Cu at zero, Eos diffractometer. The crystal was kept at 300 K during data collection. Using Olex2, the structure was solved with the SHELXT structure solution program using Intrinsic Phasing and refined with the SHELXL refinement package using Least Squares minimisation. Refined structure and crystallographic parameters are summarized in Figure S1 and Table S2. CCDC 2177793 contains the supplementary crystallographic data for yangjin309\_1102\_auto. The crystallographic data of the compound can be obtained free of charge from The Cambridge Crystallographic Data Centre via [http://www.ccdc.cam.ac.uk/data\\_request/cif](http://www.ccdc.cam.ac.uk/data_request/cif).

## 8. Scanned $^1\text{H}$ NMR, $^{13}\text{C}$ NMR, $^{31}\text{P}$ NMR and $^{19}\text{F}$ NMR Spectra of All products

$^1\text{H}$  NMR of **3aa** (400 MHz,  $\text{CDCl}_3$ )

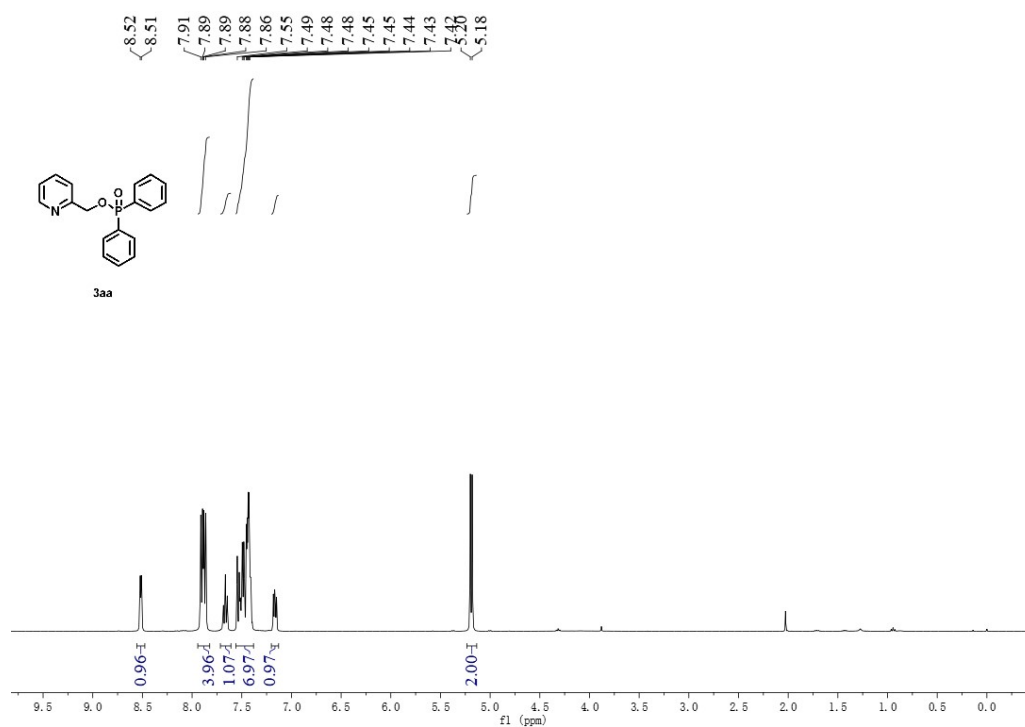

$^{13}\text{C}$  NMR of **3aa** (101 MHz,  $\text{CDCl}_3$ )

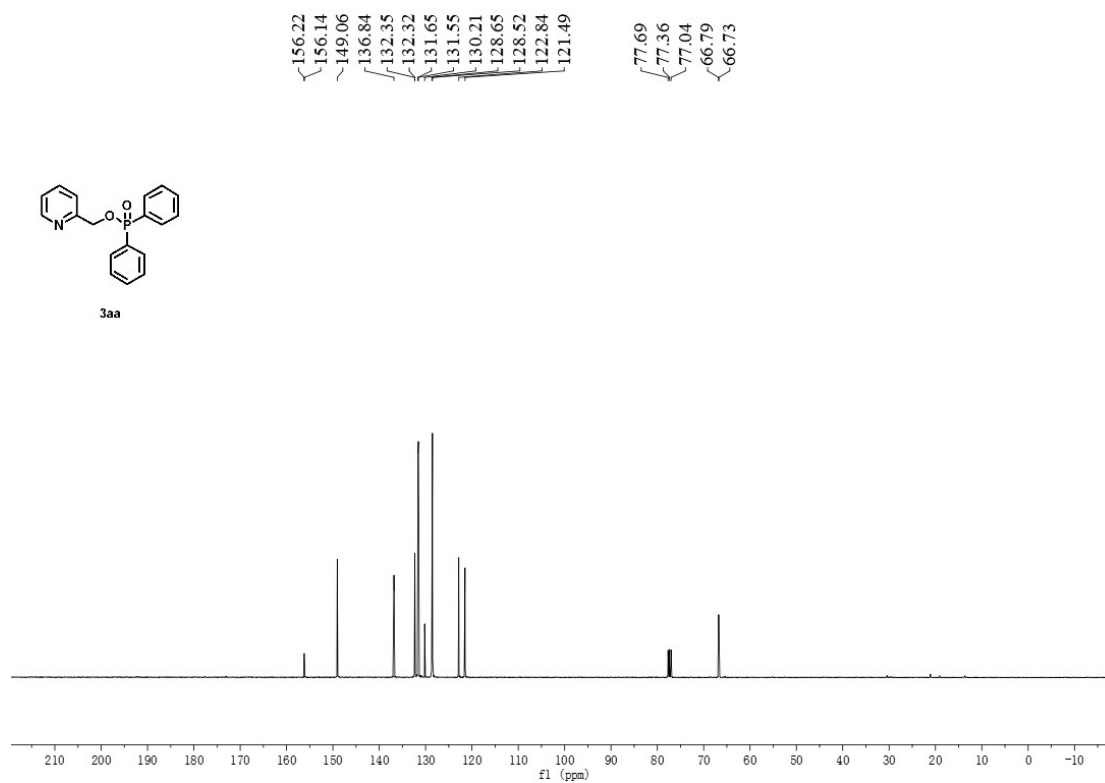

$^{31}\text{P}$  NMR of **3aa** (121 MHz,  $\text{CDCl}_3$ )

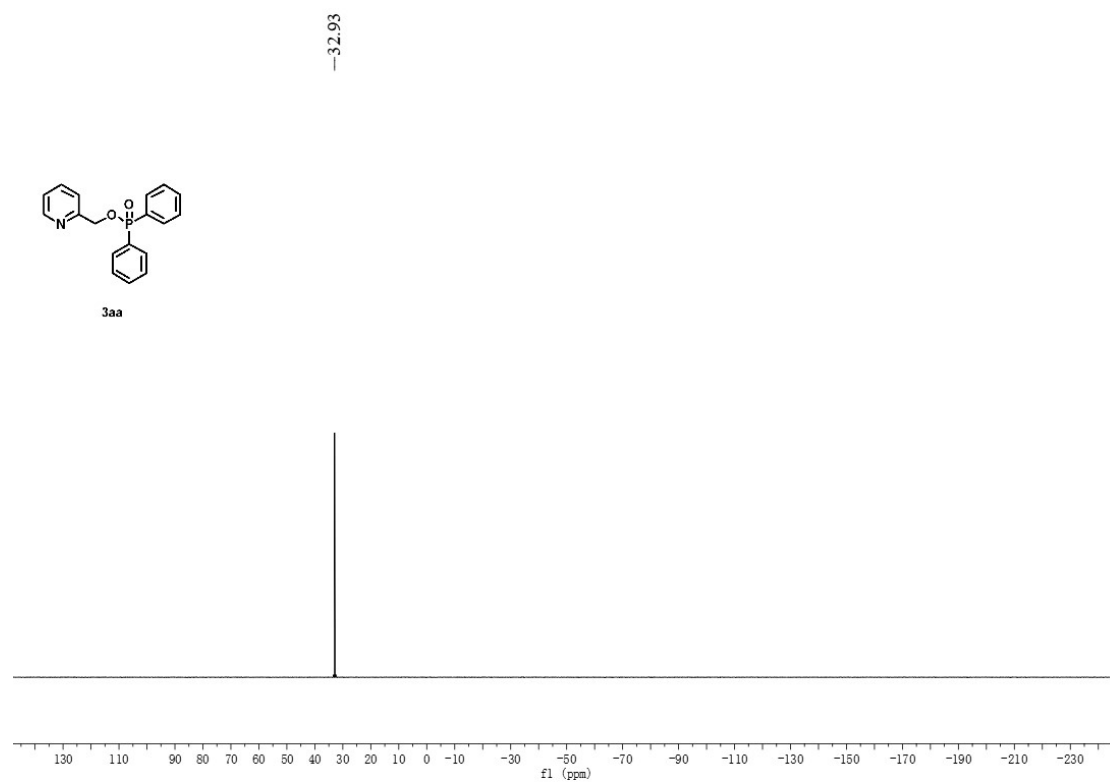

$^1\text{H}$  NMR of **3ab** (400 MHz,  $\text{CDCl}_3$ )

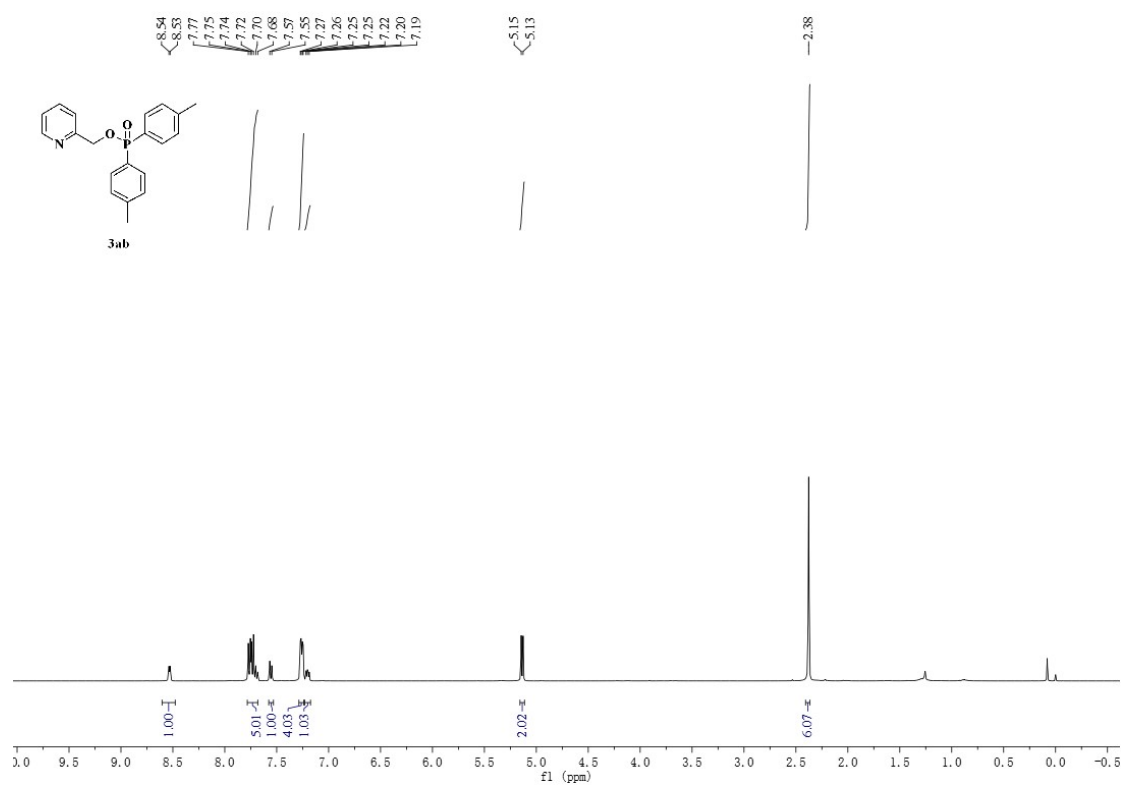

$^{13}\text{C}$  NMR of **3ab** (101 MHz,  $\text{CDCl}_3$ )

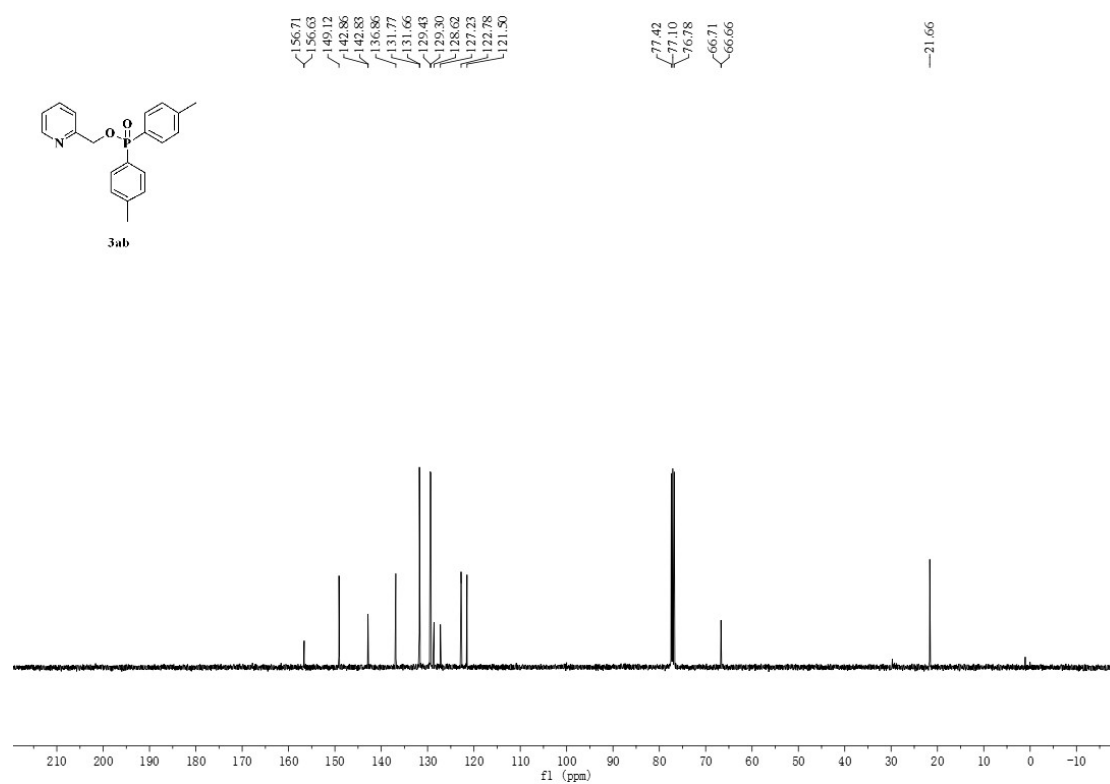

$^{31}\text{P}$  NMR of **3ab** (121 MHz,  $\text{CDCl}_3$ )

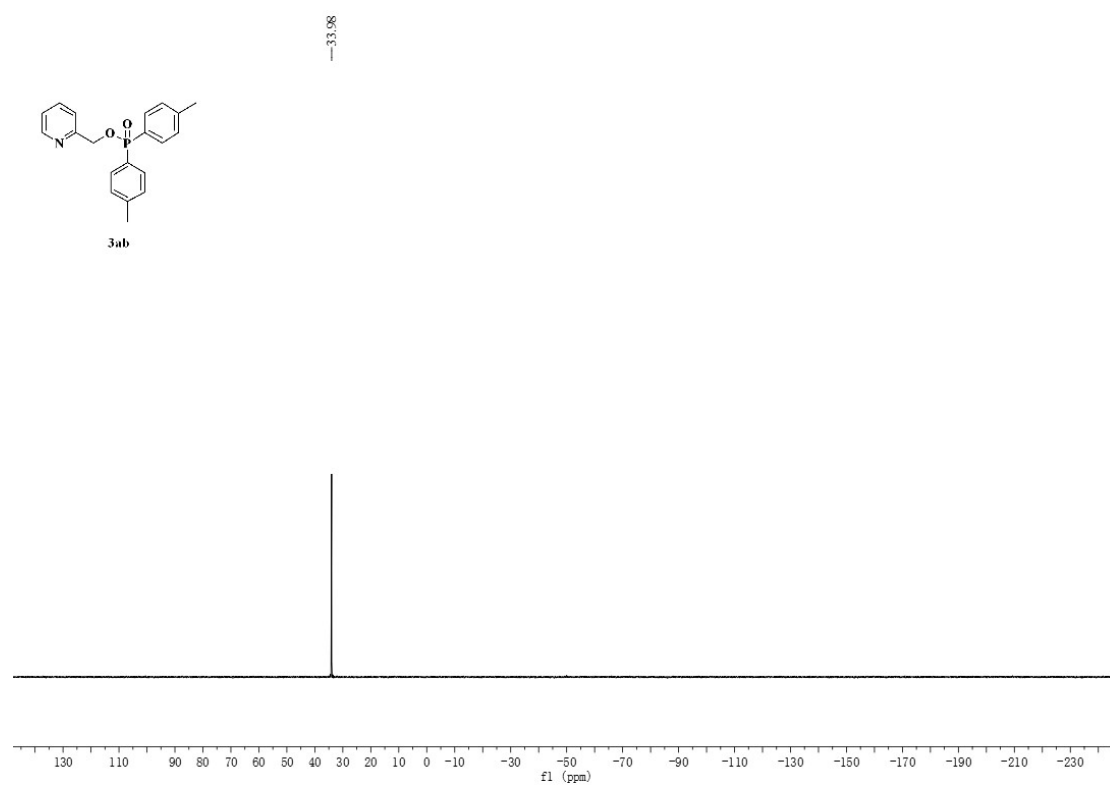

$^1\text{H}$  NMR of **3ac** (400 MHz,  $\text{CDCl}_3$ )

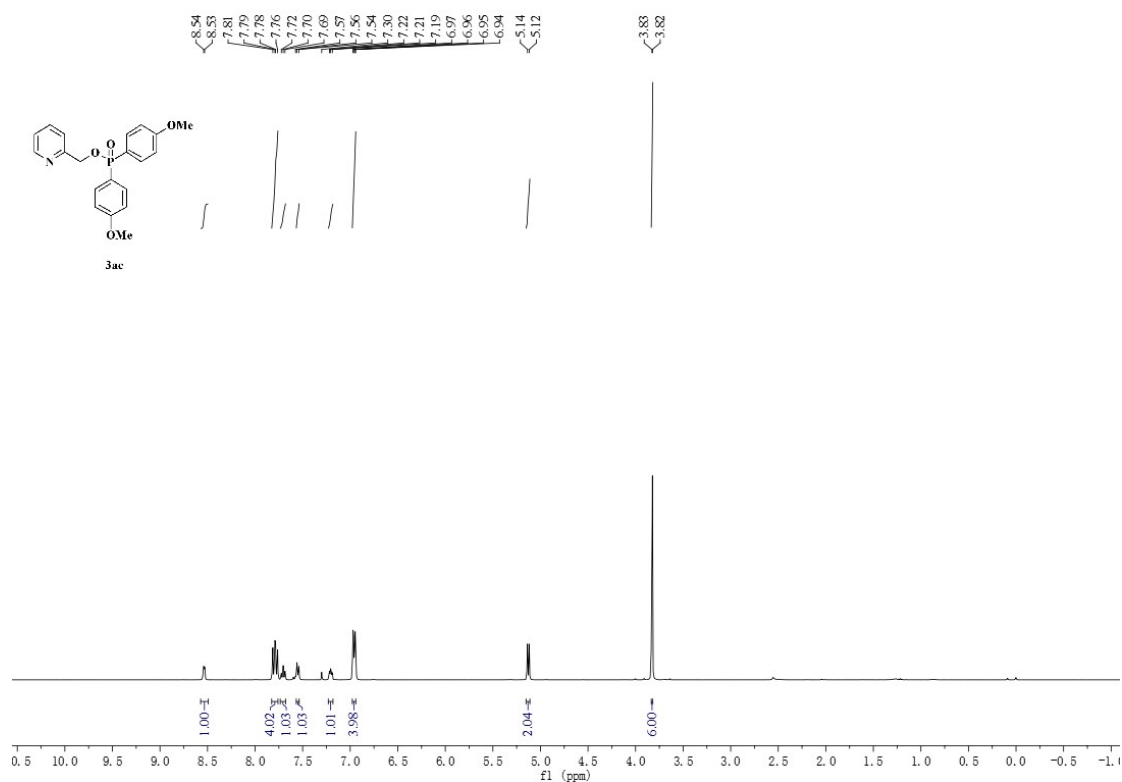

$^{13}\text{C}$  NMR of **3ac** (101 MHz,  $\text{CDCl}_3$ )

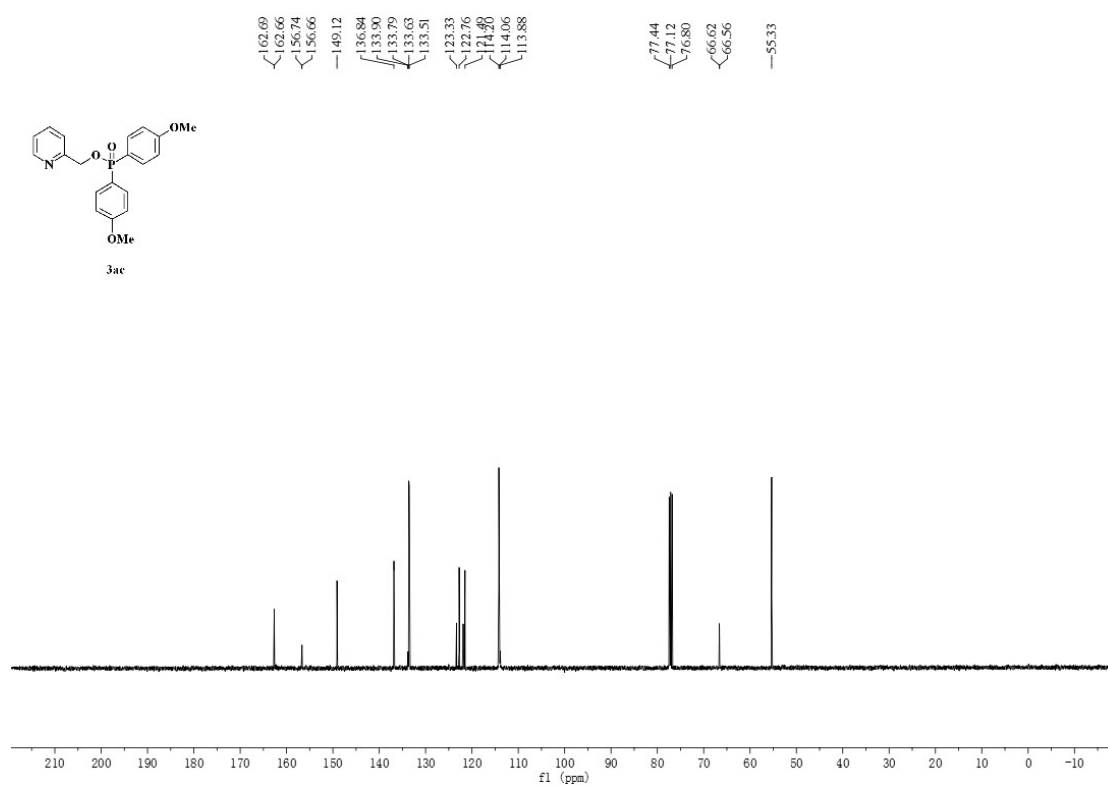

$^{31}\text{P}$  NMR of **3ac** (121 MHz,  $\text{CDCl}_3$ )

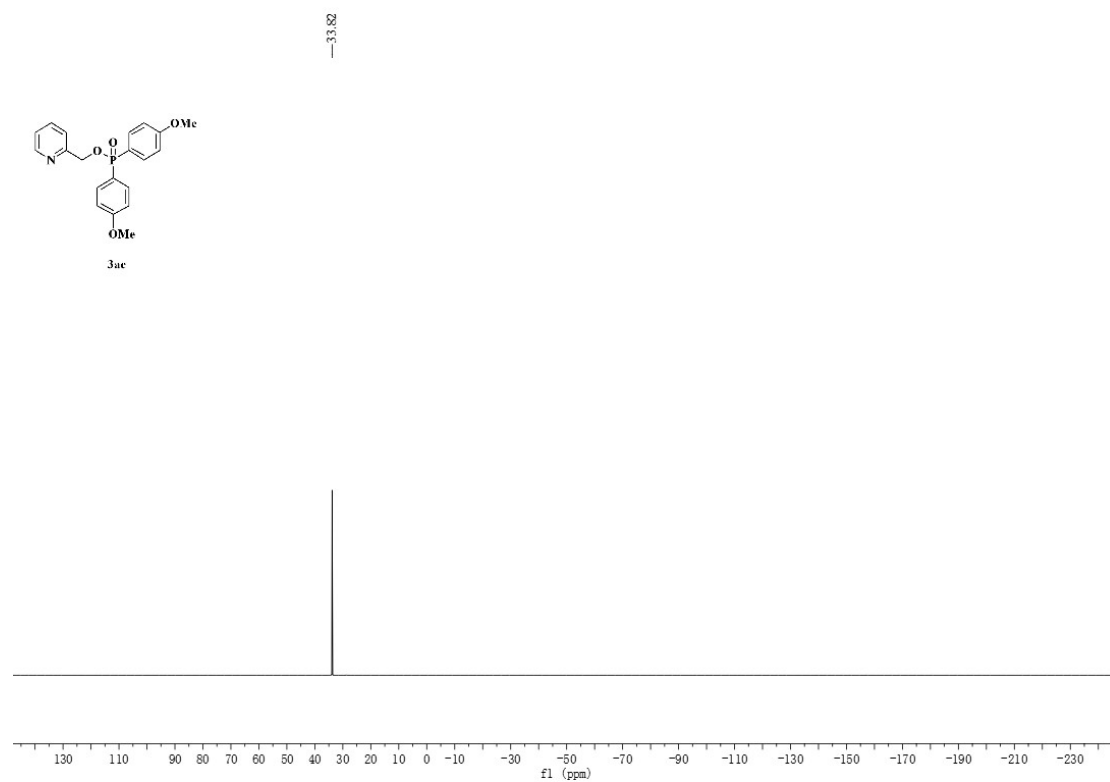

$^1\text{H}$  NMR of **3ad** (400 MHz,  $\text{CDCl}_3$ )

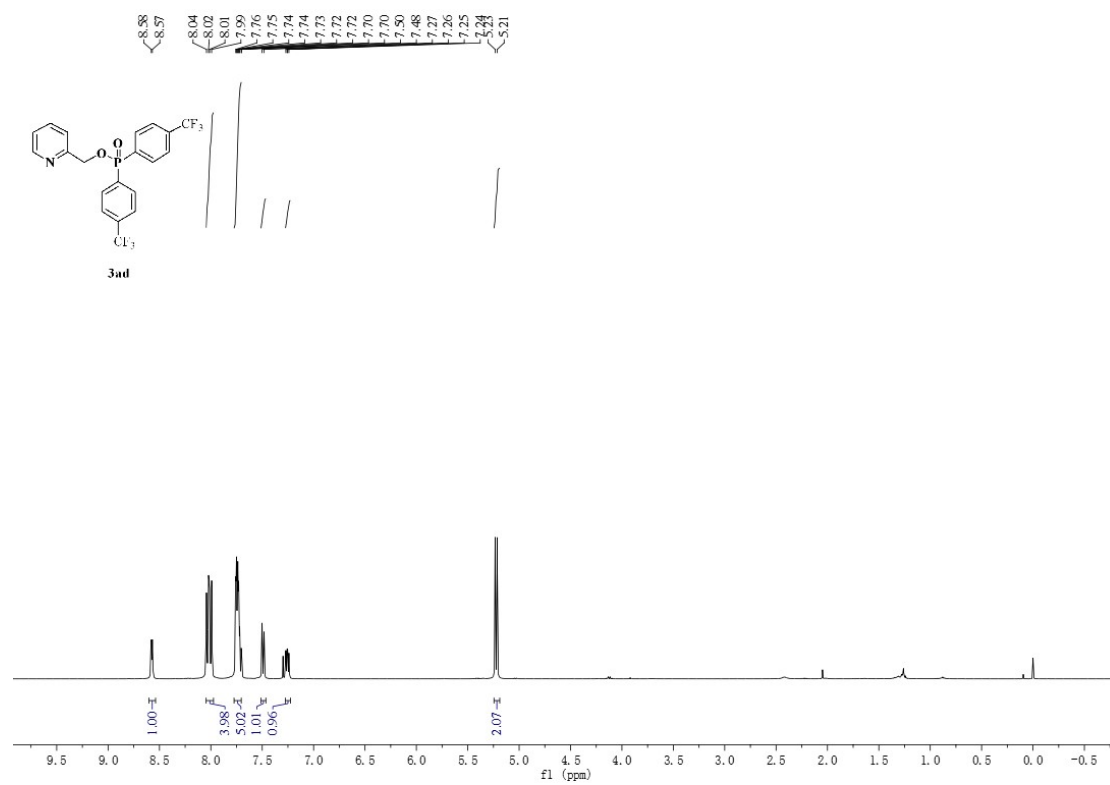



<sup>13</sup>C NMR of **3ad** (101 MHz, CDCl<sub>3</sub>)

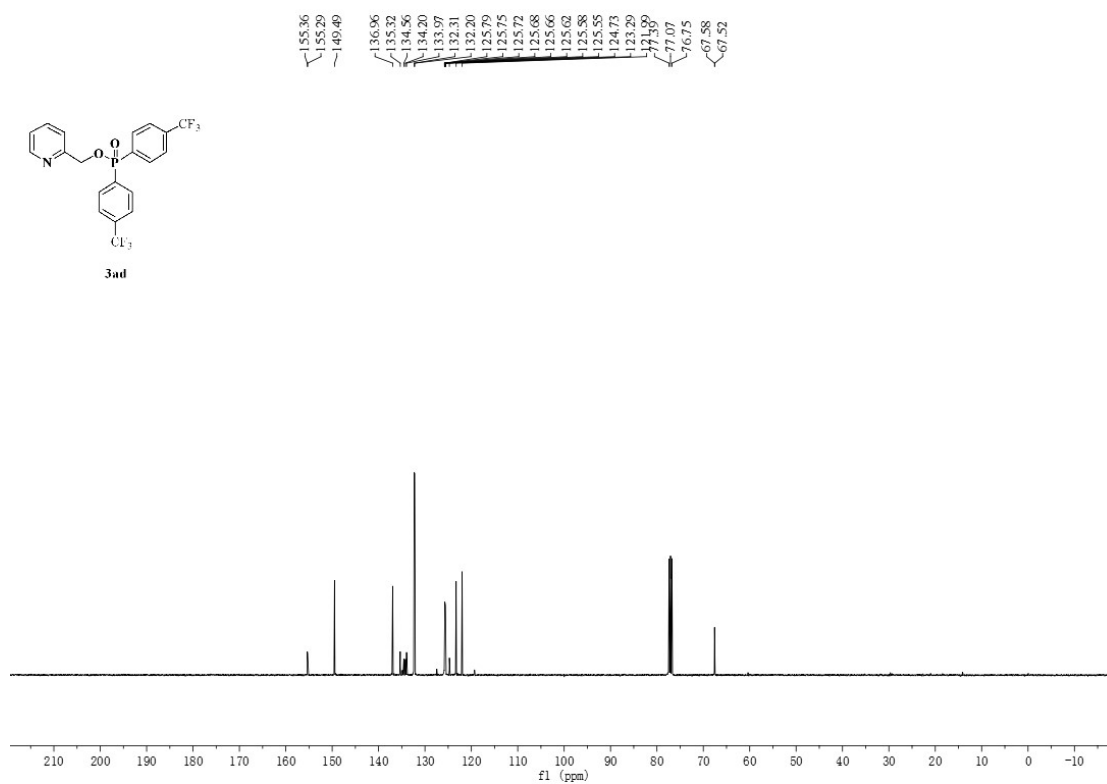

<sup>19</sup>F NMR of **3ad** (282 MHz, CDCl<sub>3</sub>)

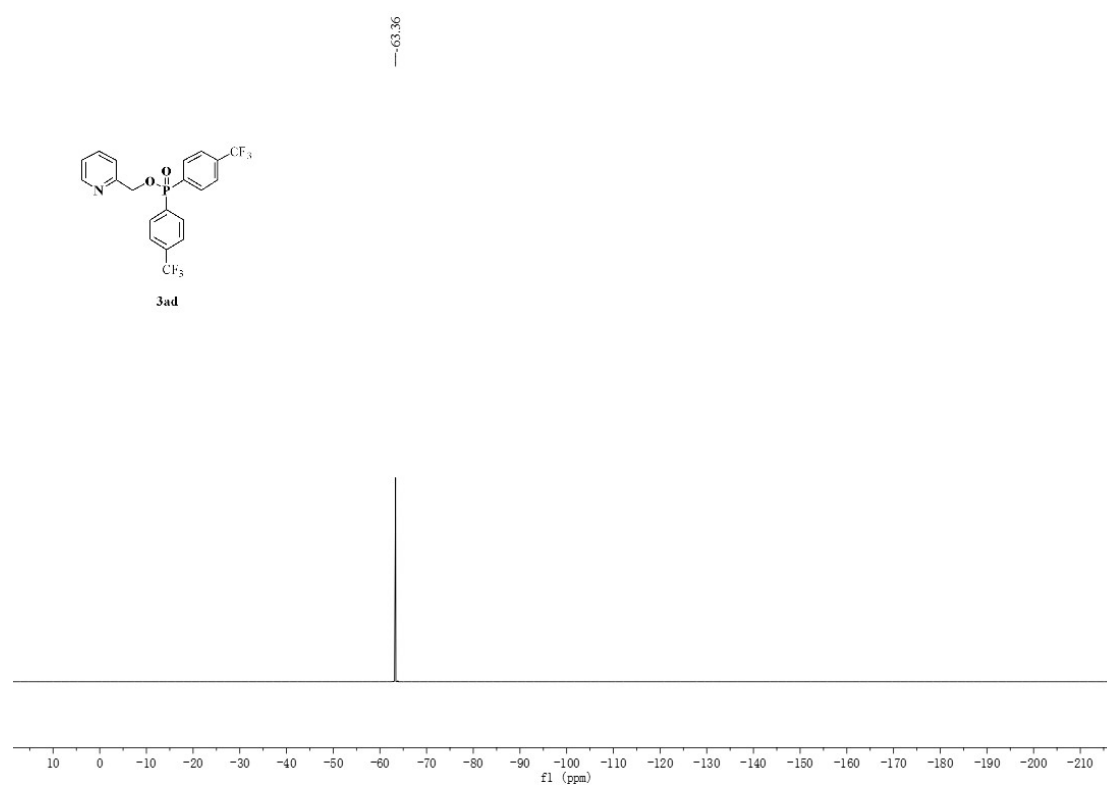

$^{31}\text{P}$  NMR of **3ad** (121 MHz,  $\text{CDCl}_3$ )

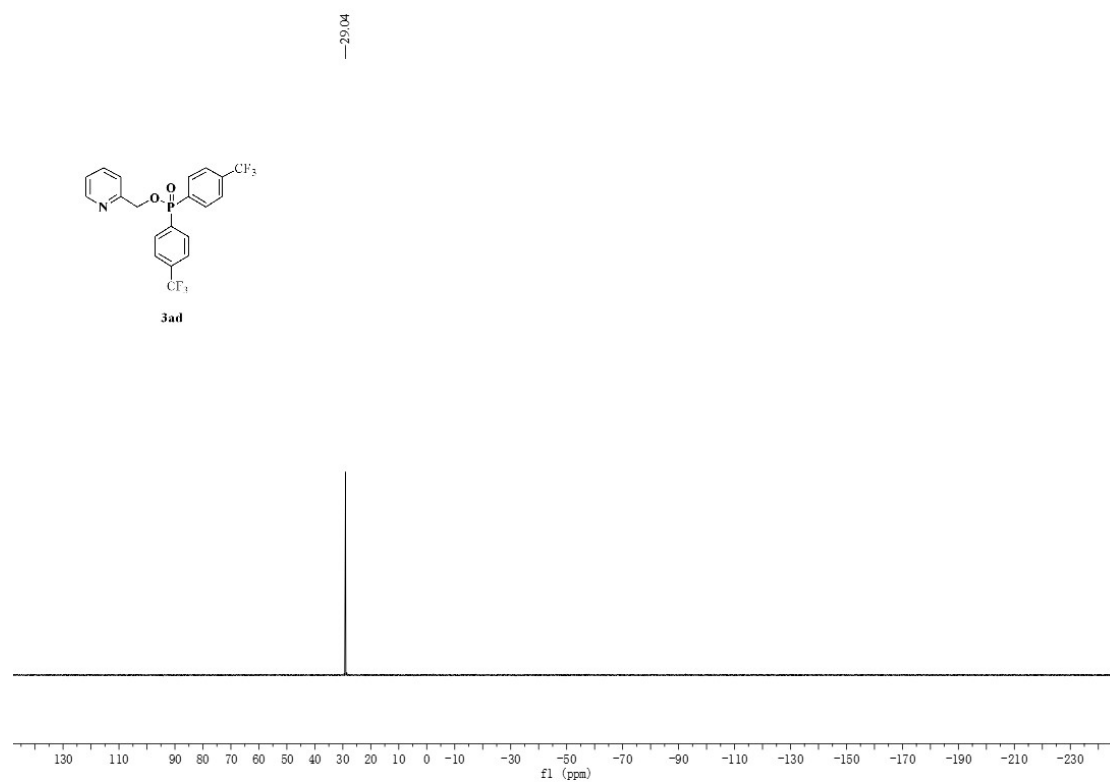

$^1\text{H}$  NMR of **3ae** (400 MHz,  $\text{CDCl}_3$ )

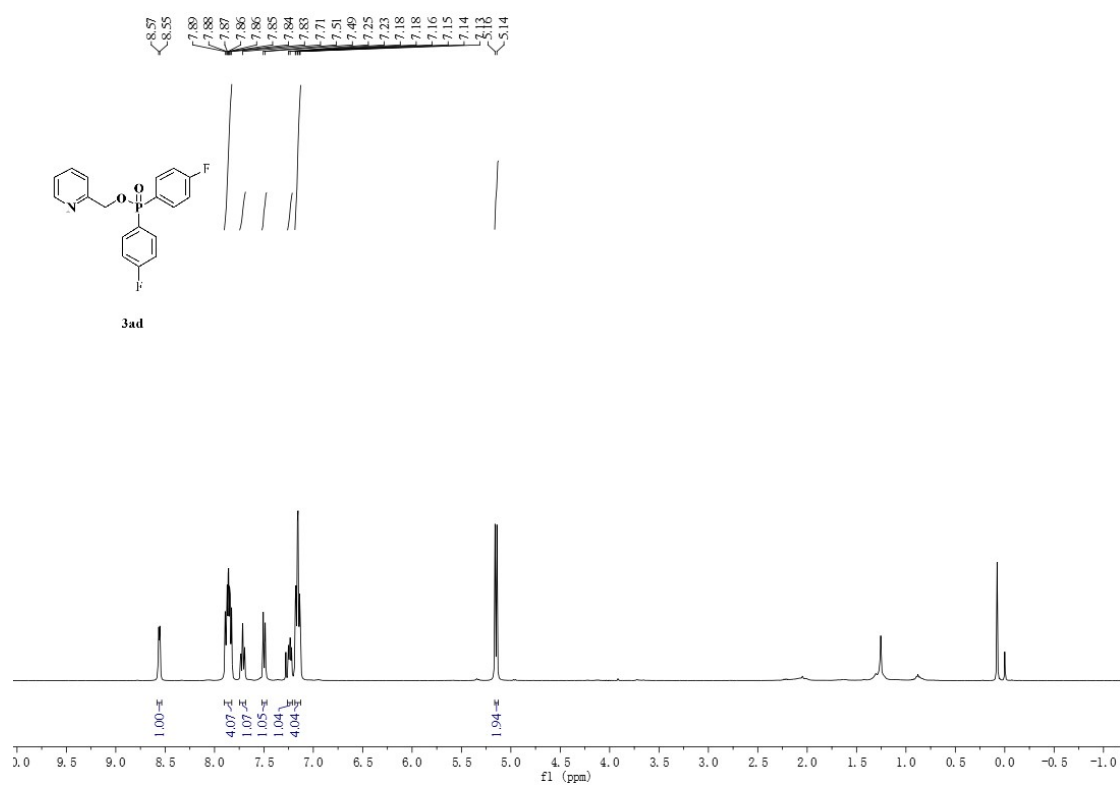

$^{13}\text{C}$  NMR of **3ae** (101 MHz,  $\text{CDCl}_3$ )

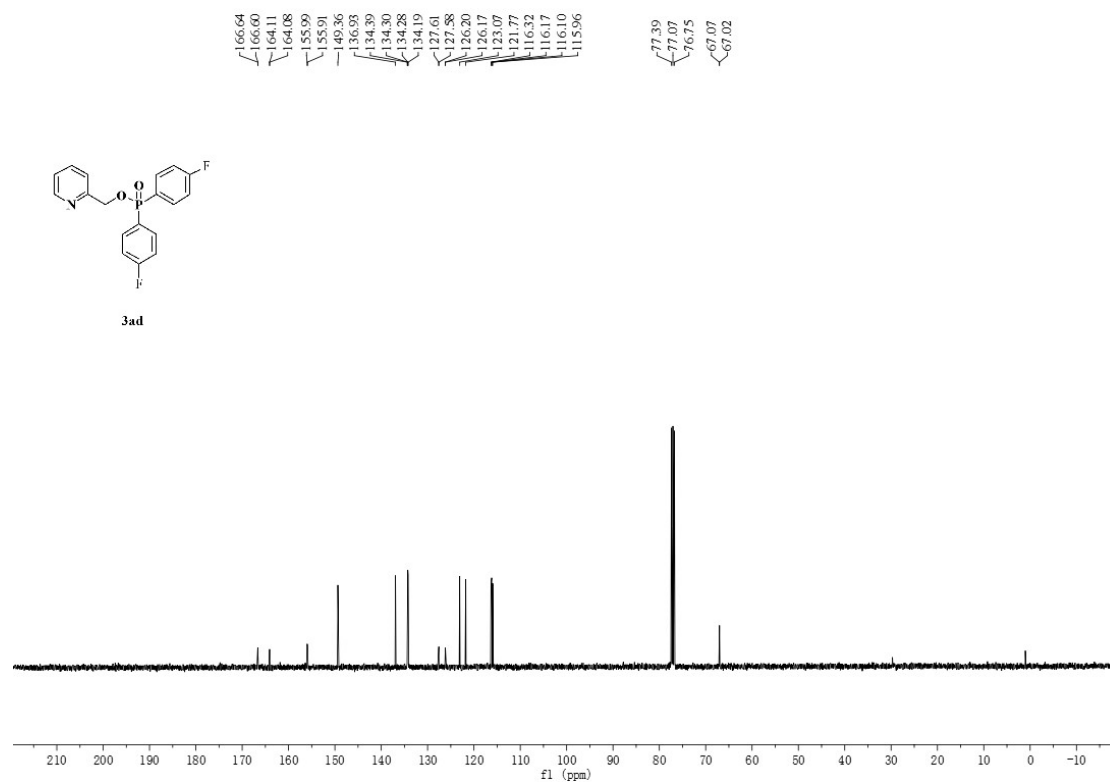

$^{19}\text{F}$  NMR of **3ae** (282 MHz,  $\text{CDCl}_3$ )

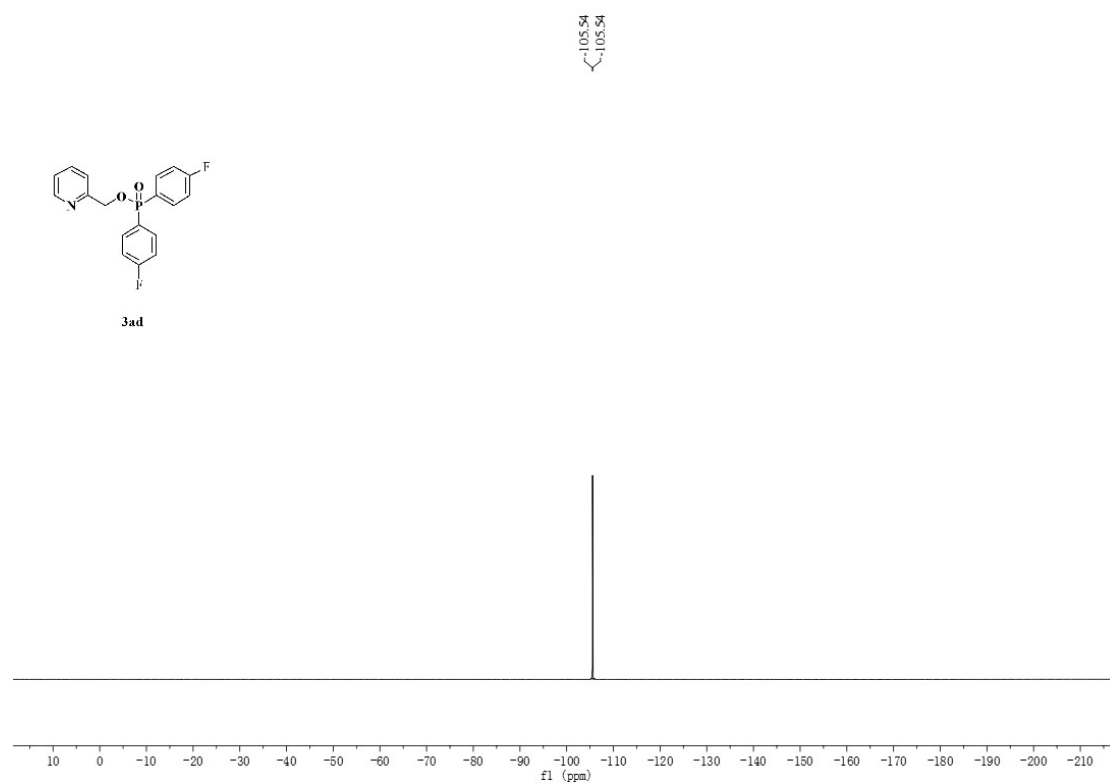

$^{31}\text{P}$  NMR of **3ae** (121 MHz,  $\text{CDCl}_3$ )

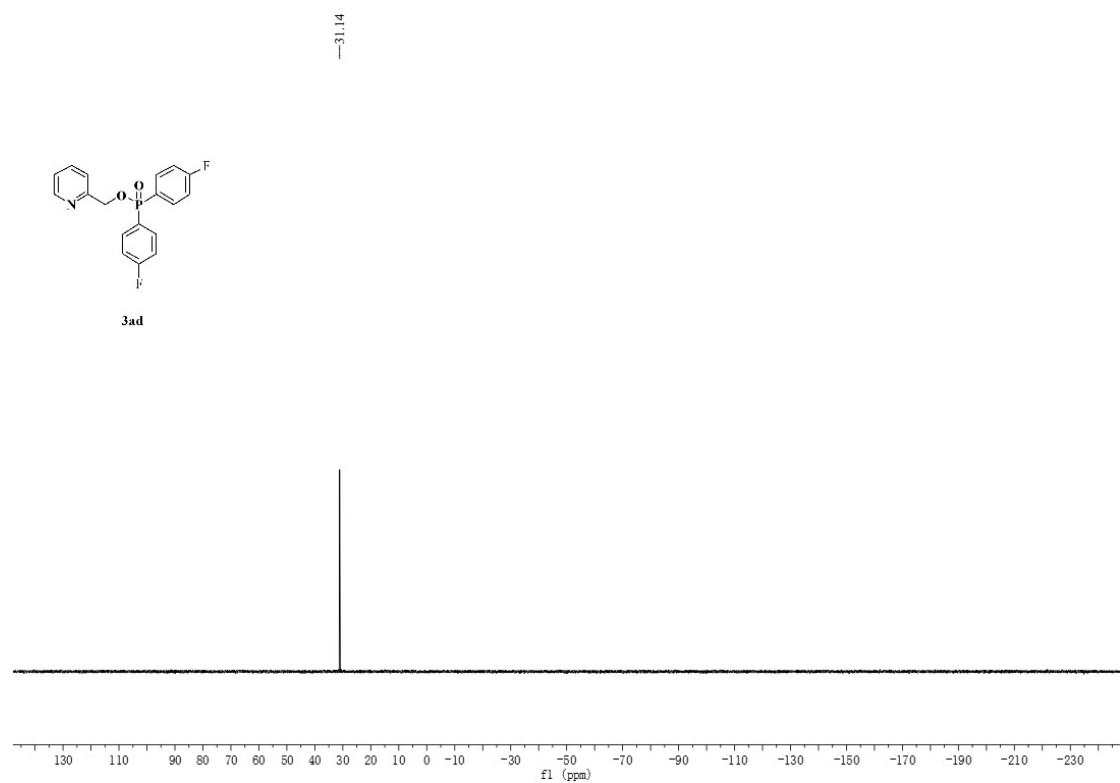

$^1\text{H}$  NMR of **3af** (400 MHz,  $\text{CDCl}_3$ )

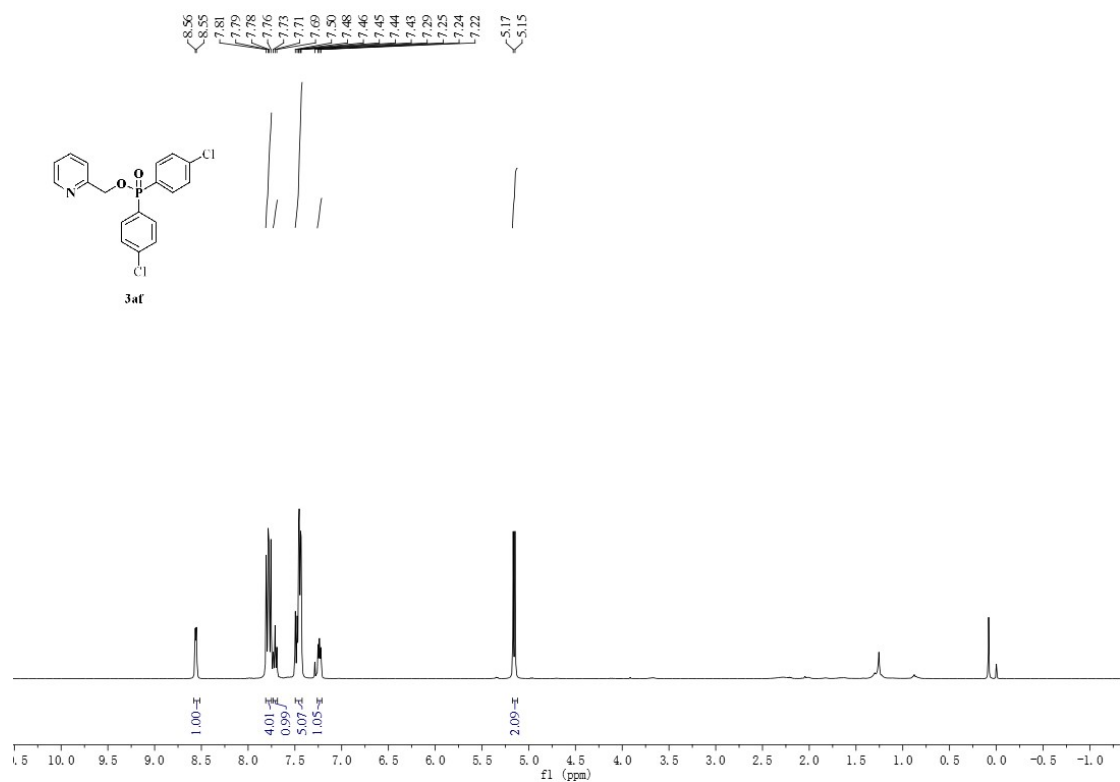

$^{13}\text{C}$  NMR of **3af** (101 MHz,  $\text{CDCl}_3$ )

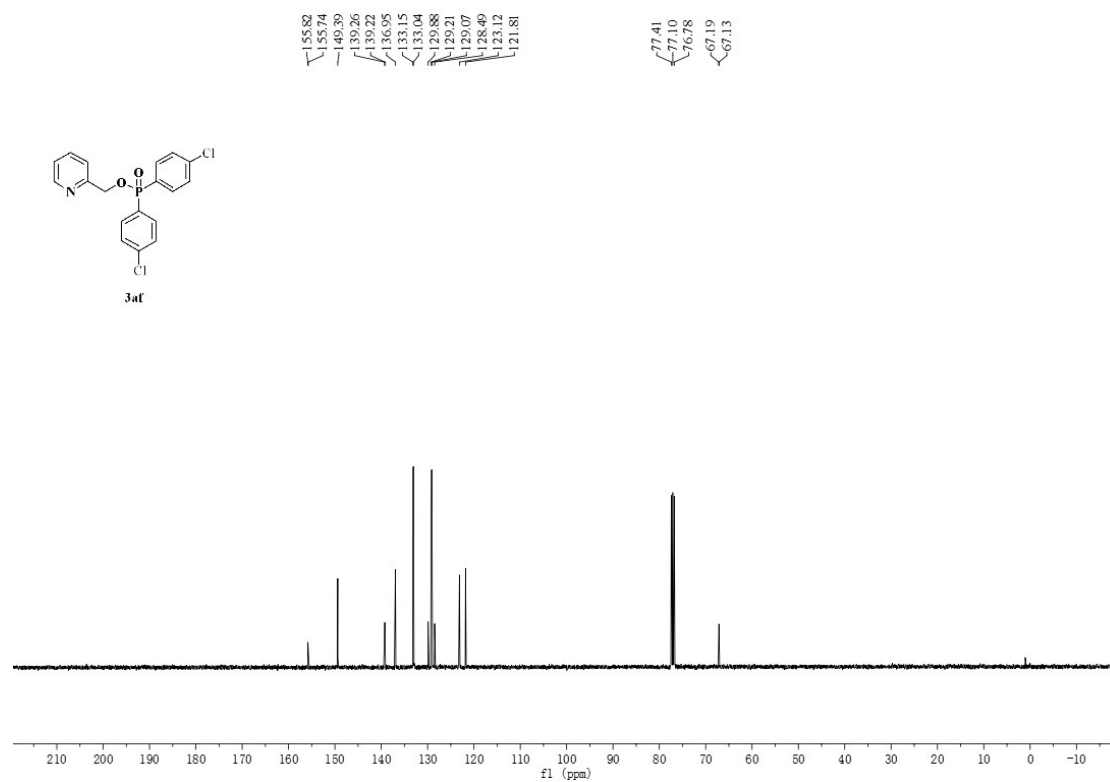

$^{31}\text{P}$  NMR of **3af** (121 MHz,  $\text{CDCl}_3$ )

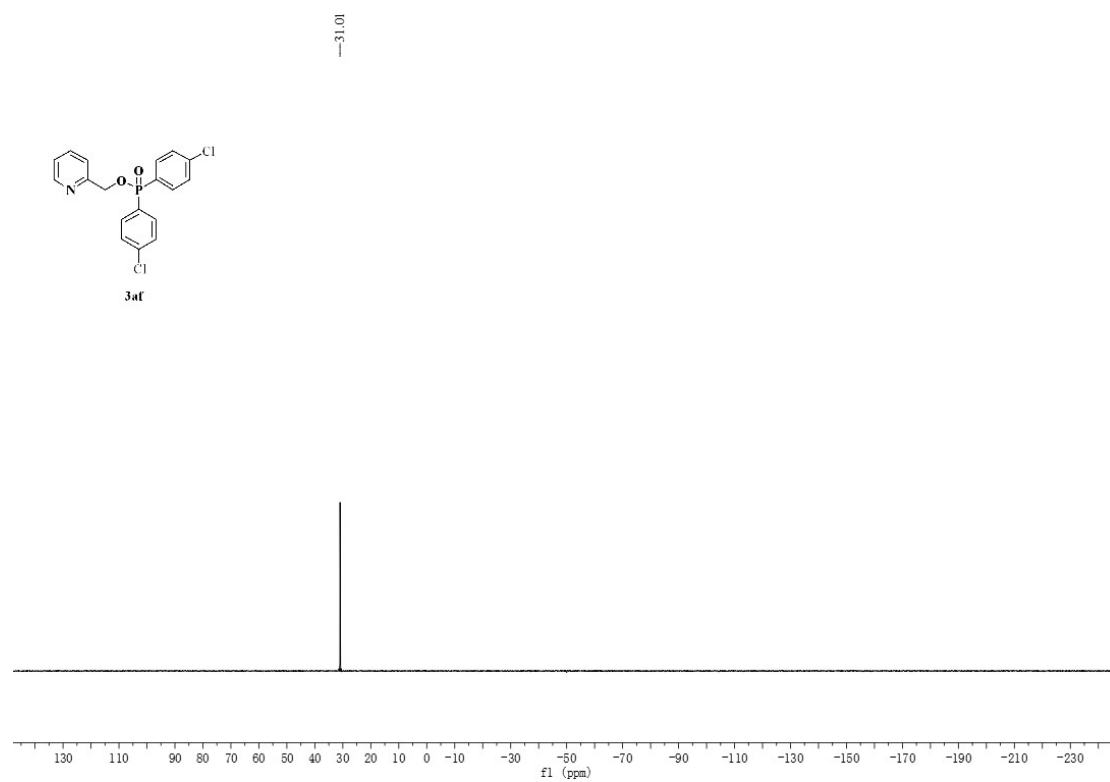

$^1\text{H}$  NMR of **3ag** (400 MHz,  $\text{CDCl}_3$ )

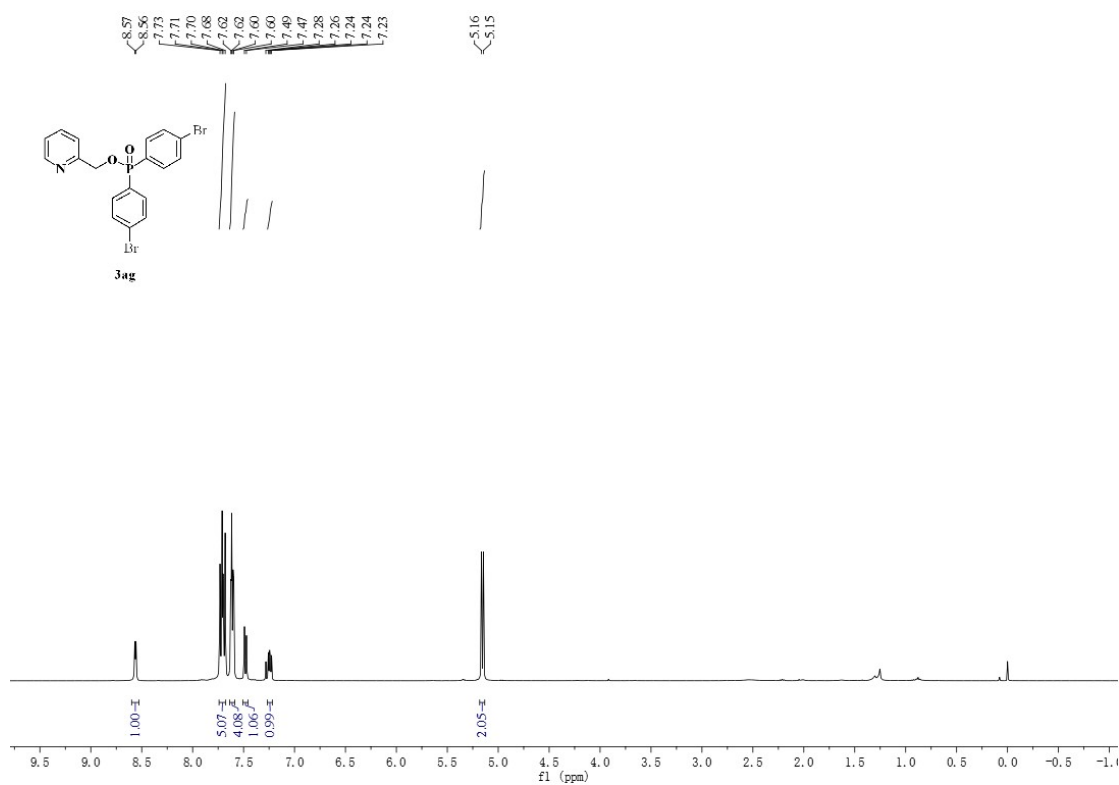

$^{13}\text{C}$  NMR of **3ag** (101 MHz,  $\text{CDCl}_3$ )

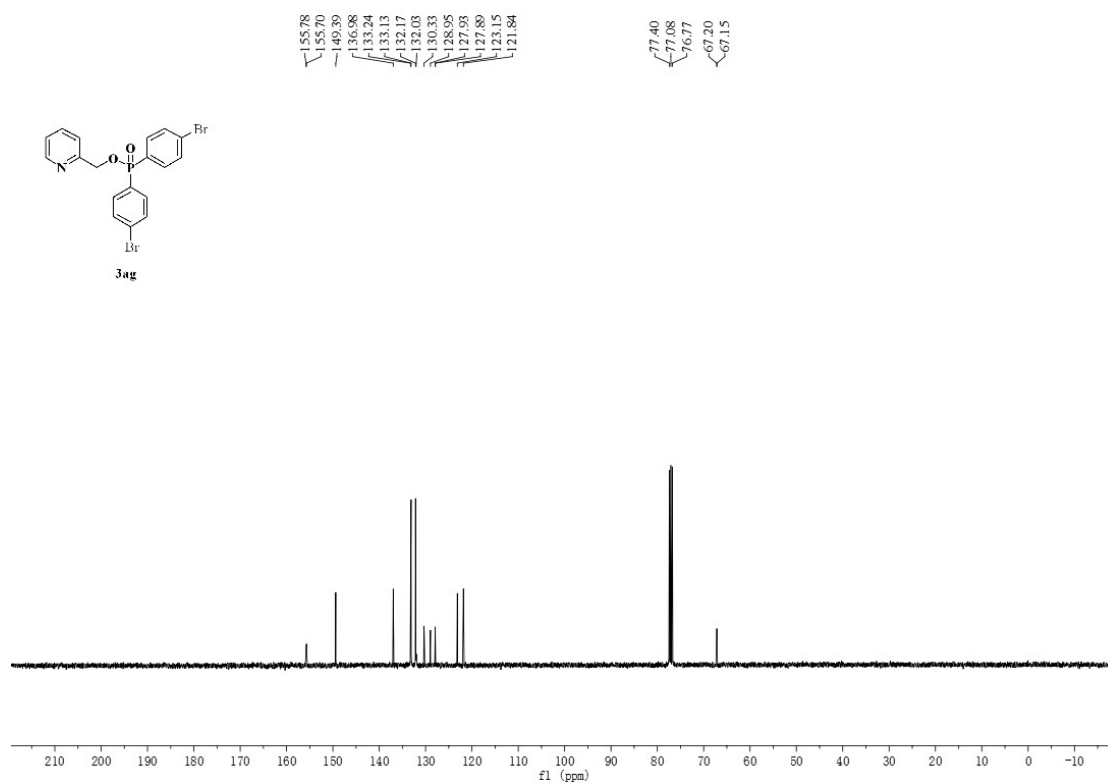

Chemical structure of compound **3ag** is shown above the spectrum. The structure is a pyridine ring substituted with a 4-bromophenyl group and a 4-bromophenyl phosphonate group. The spectrum shows a single sharp peak at approximately 31.27 ppm, corresponding to the phosphorus atom in the phosphonate group.

Chemical structure of **3ah**: Cc1ccc(cc1)C(=O)OCc2ccncc2

<sup>1</sup>H NMR spectrum (CDCl<sub>3</sub>) of **3ah**. The x-axis represents the chemical shift in ppm, ranging from -0.1 to 9.5. The spectrum shows several peaks corresponding to the protons in the molecule.

Peak list (ppm): 8.54, 7.72, 7.71, 7.70, 7.68, 7.67, 7.65, 7.64, 7.63, 7.62, 7.57, 7.55, 7.35, 7.34, 7.34, 7.33, 7.33, 7.22, 7.21, 7.17, 5.15, 2.37.

Integration values: 1.00, 4.96, 0.99, 4.04, 1.03, 2.05, 6.05.

$^{13}\text{C}$  NMR of **3ah** (101 MHz,  $\text{CDCl}_3$ )

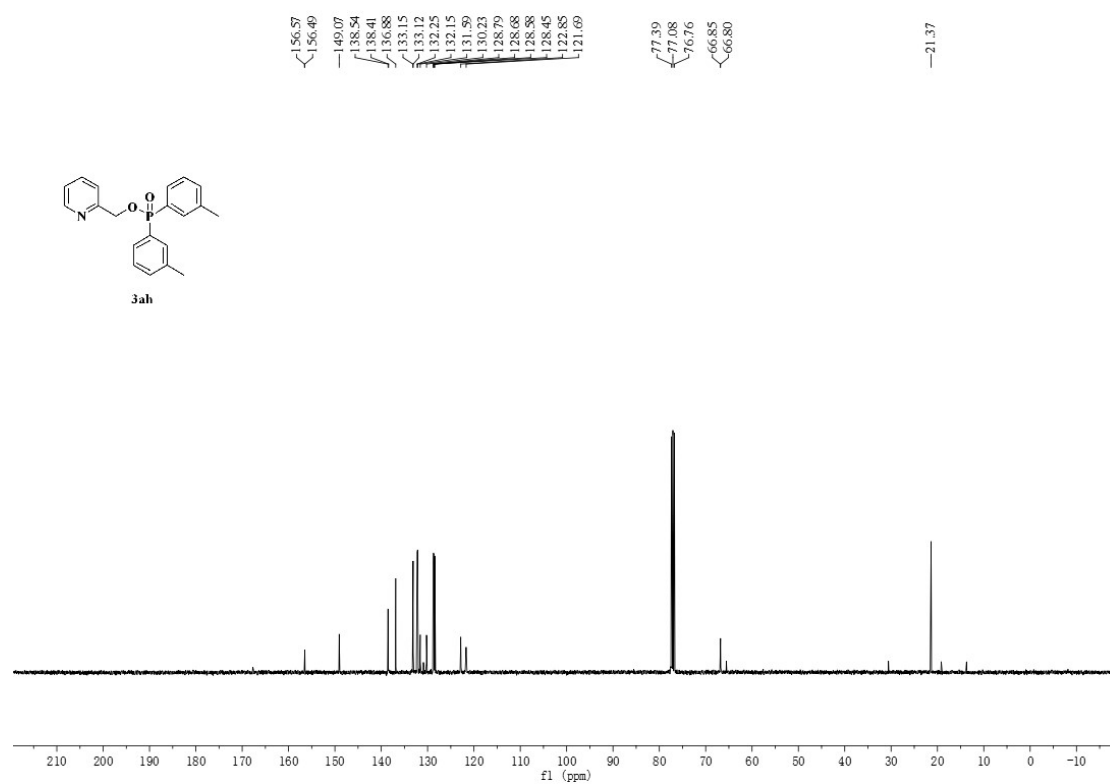

$^{31}\text{P}$  NMR of **3ah** (121 MHz,  $\text{CDCl}_3$ )

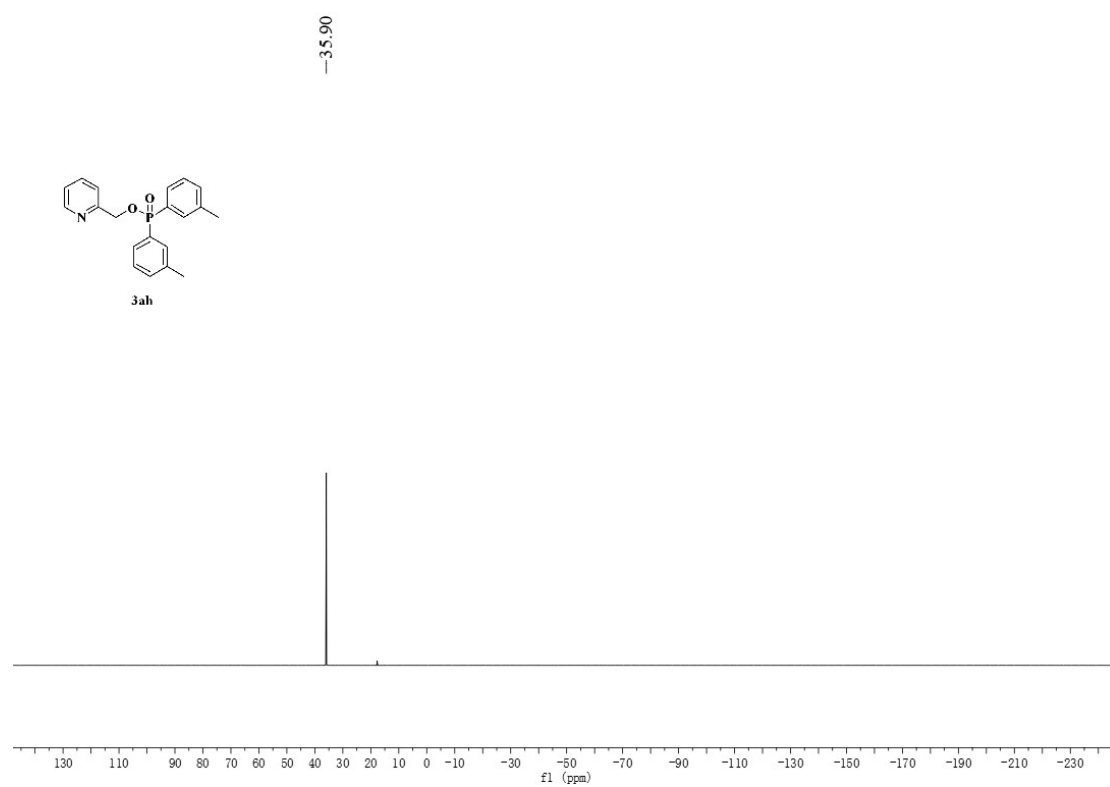



$^1\text{H}$  NMR of **3ai** (400 MHz,  $\text{CDCl}_3$ )

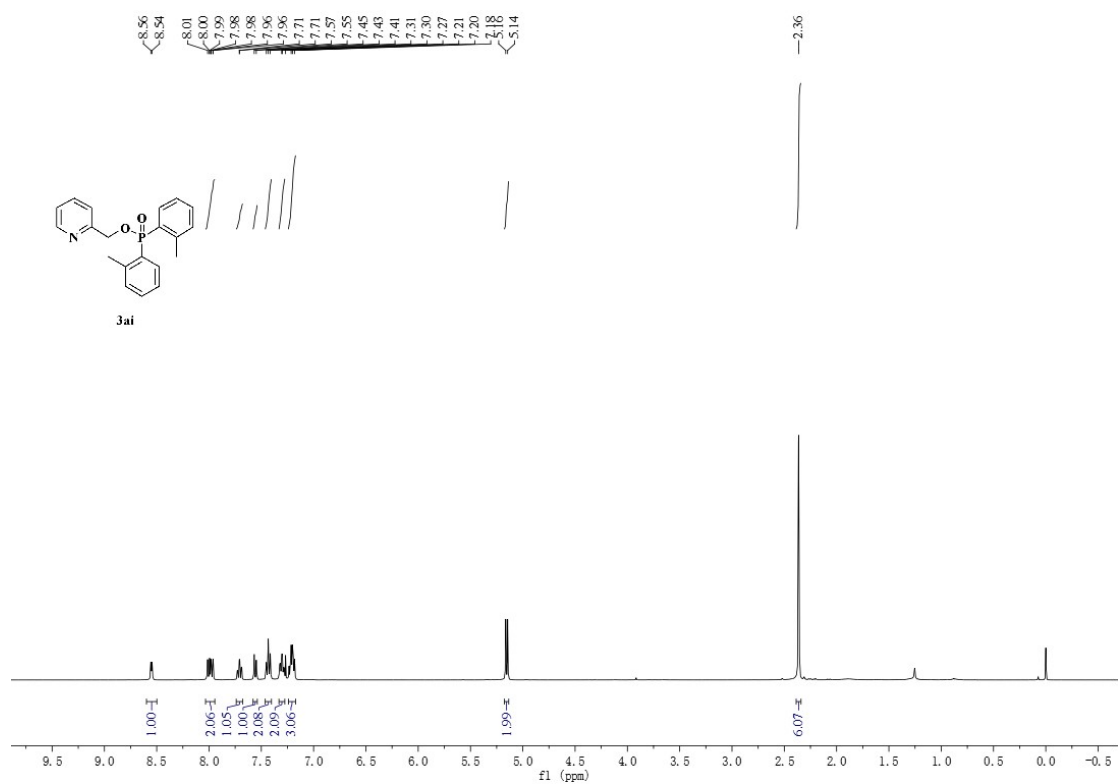

$^{13}\text{C}$  NMR of **3ai** (101 MHz,  $\text{CDCl}_3$ )

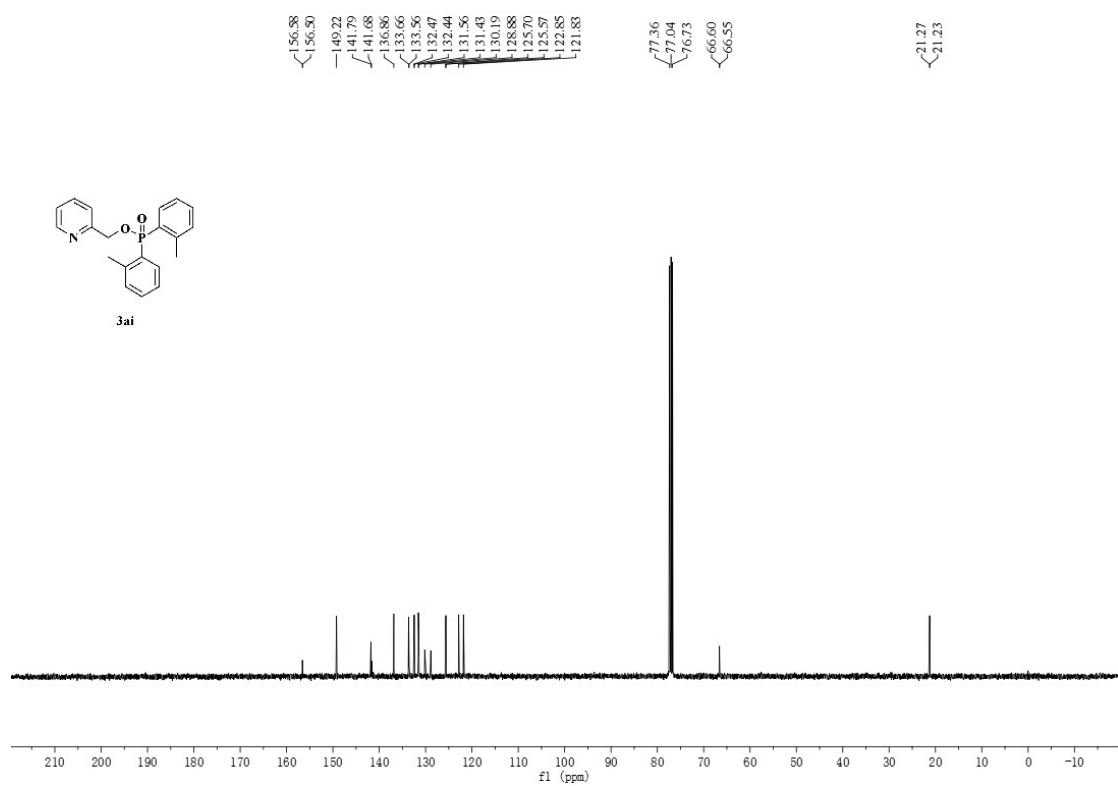

$^{31}\text{P}$  NMR of **3ai** (121 MHz,  $\text{CDCl}_3$ )

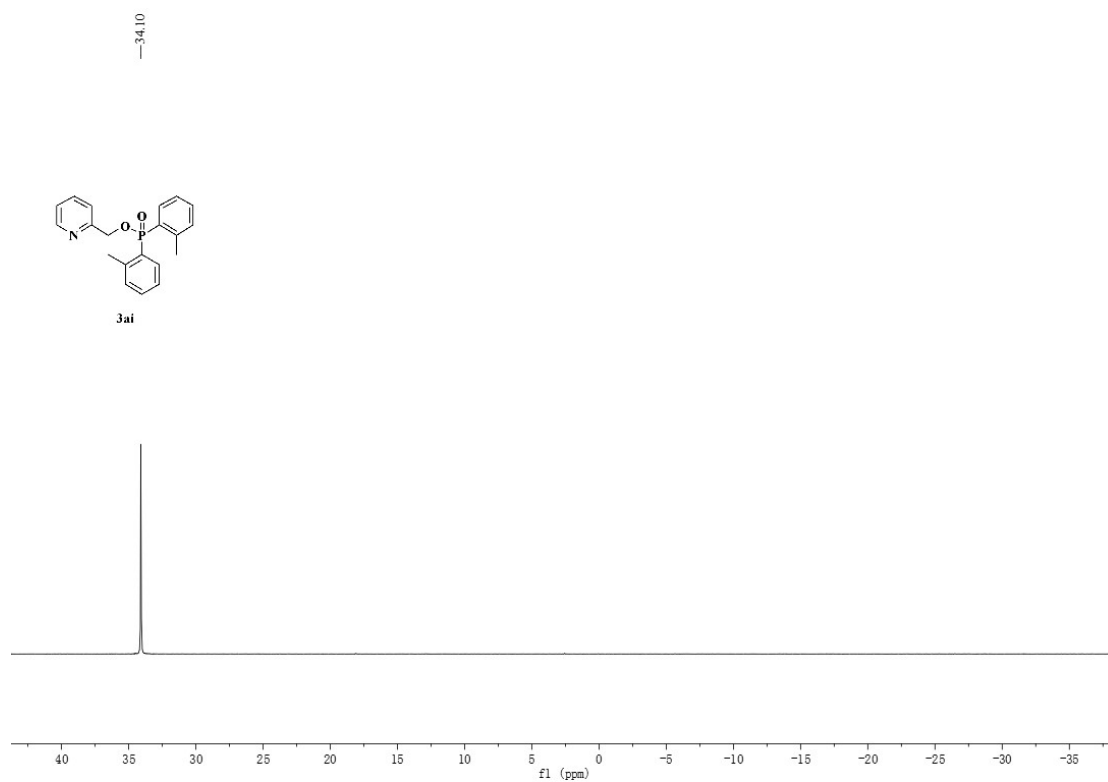

$^1\text{H}$  NMR of **3aj** (400 MHz,  $\text{CDCl}_3$ )

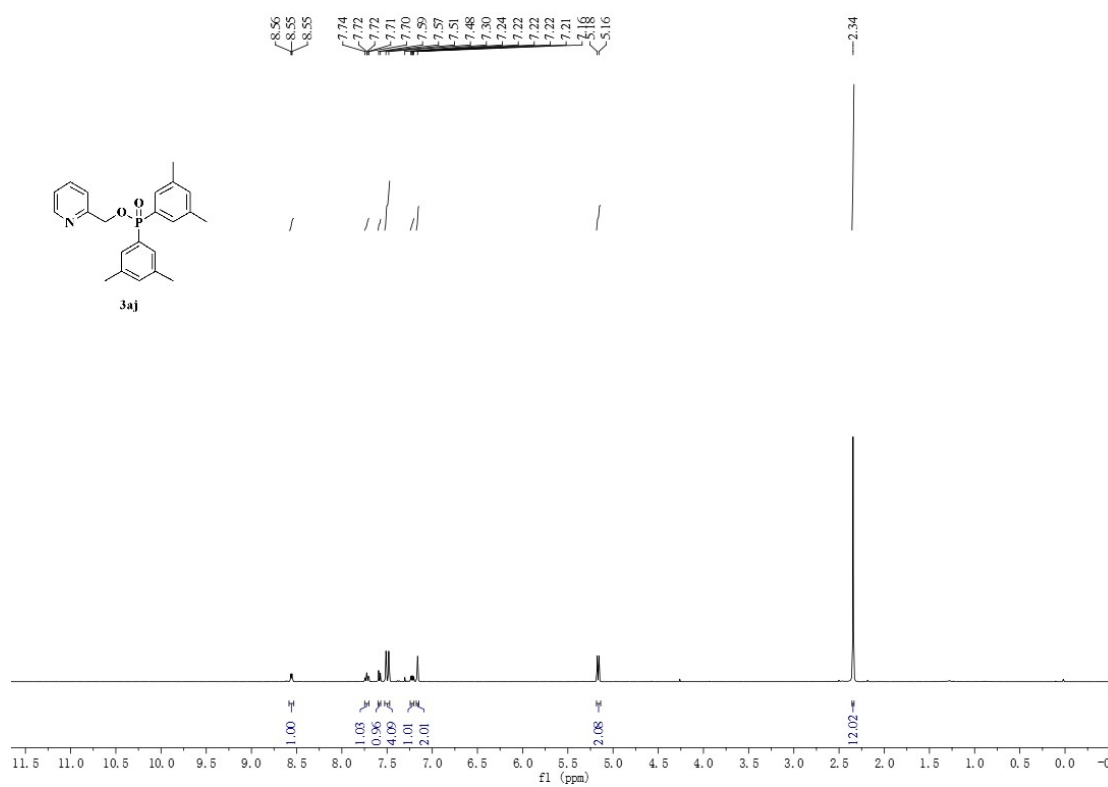

$^{13}\text{C}$  NMR of **3aj** (101 MHz,  $\text{CDCl}_3$ )

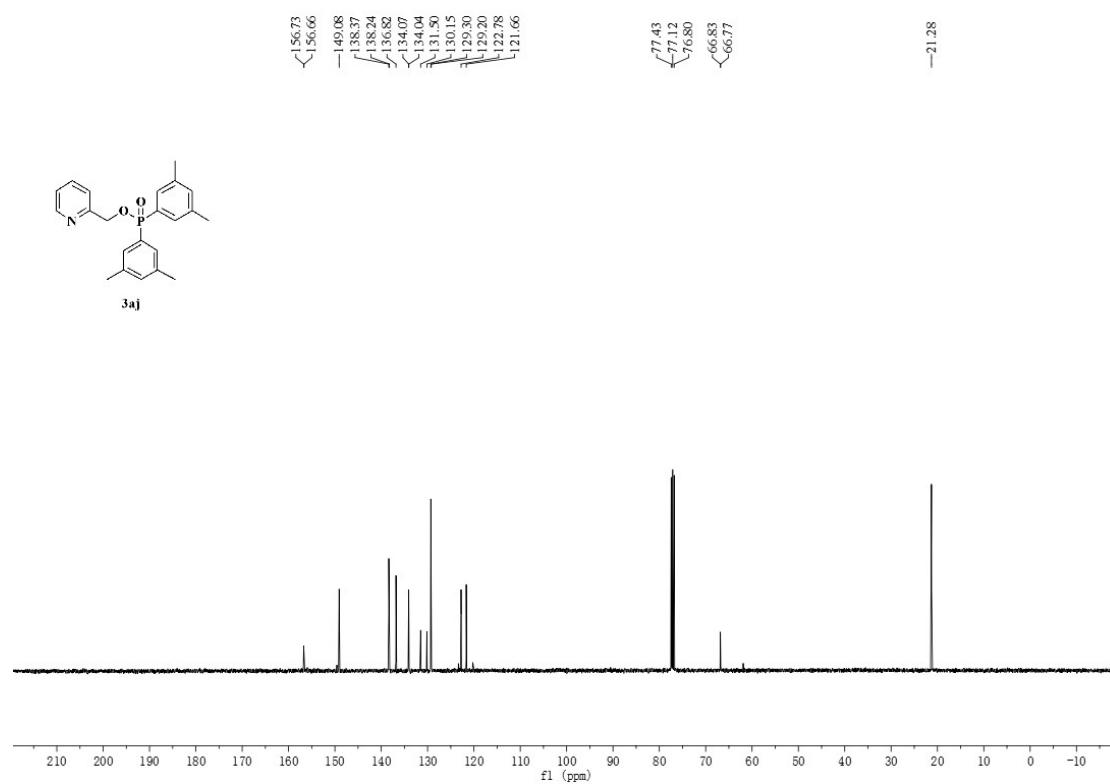

$^{31}\text{P}$  NMR of **3aj** (121 MHz,  $\text{CDCl}_3$ )

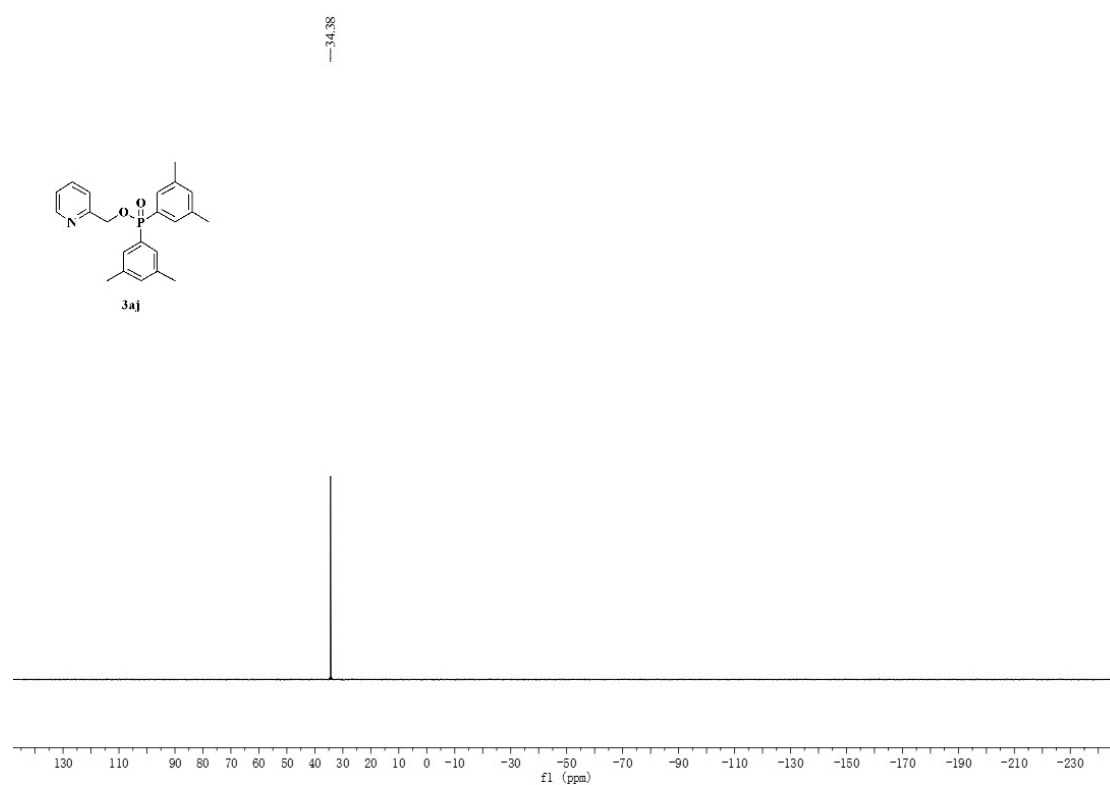

$^1\text{H}$  NMR of **3ak** (400 MHz,  $\text{CDCl}_3$ )

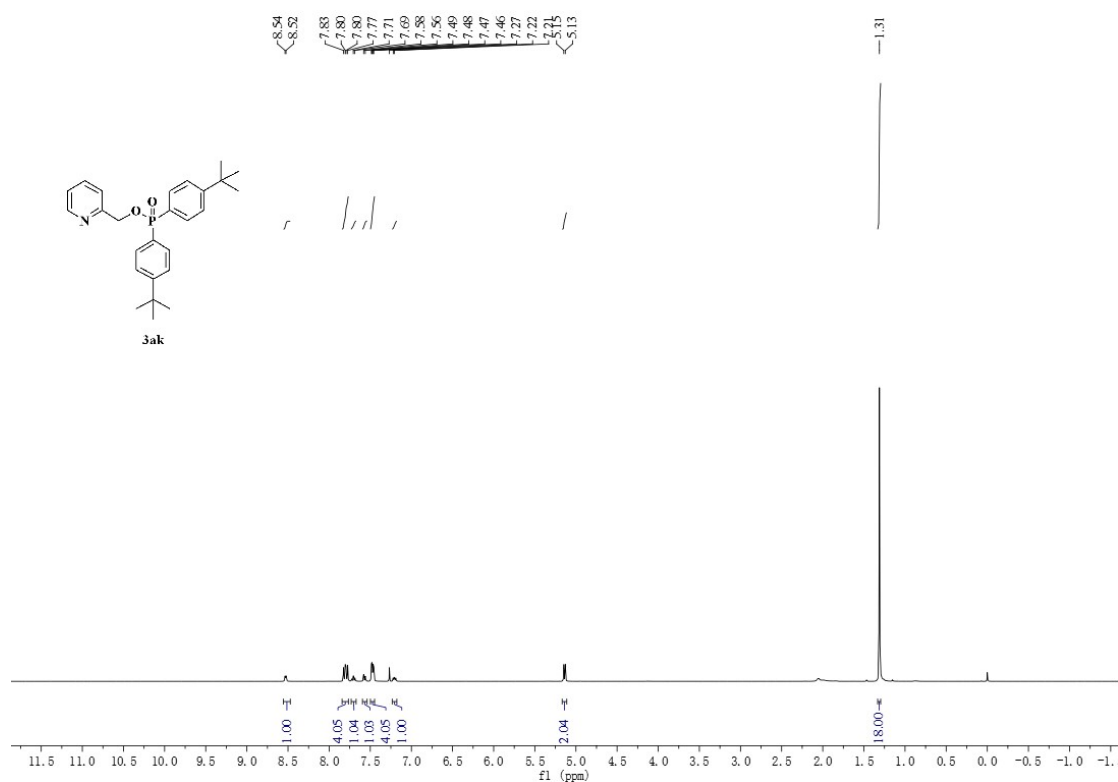

$^{13}\text{C}$  NMR of **3ak** (101 MHz,  $\text{CDCl}_3$ )

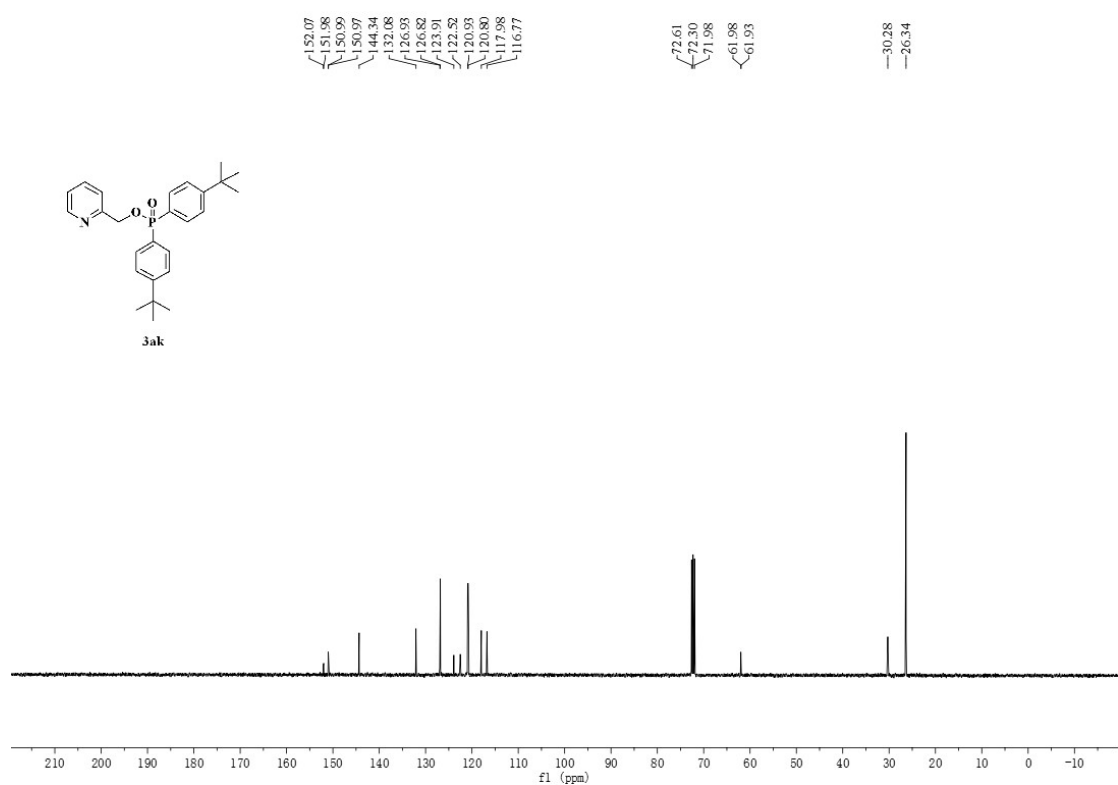

$^{31}\text{P}$  NMR of **3ak** (121 MHz,  $\text{CDCl}_3$ )

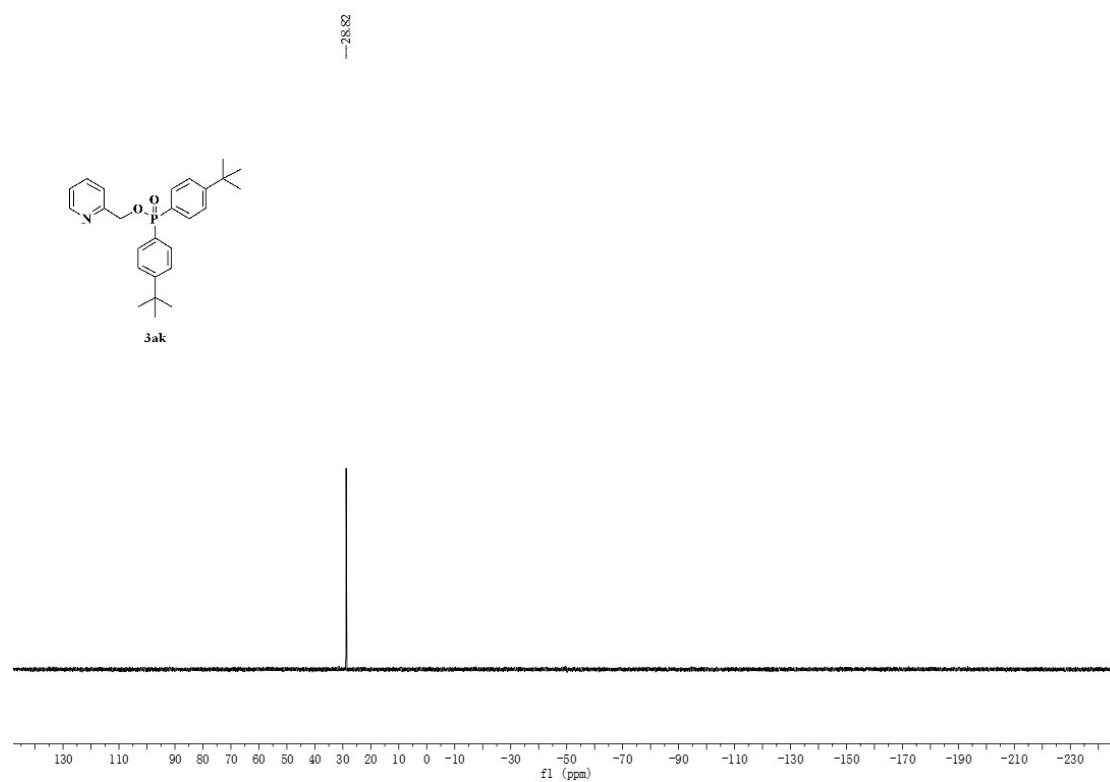

$^1\text{H}$  NMR of **3al** (400 MHz,  $\text{CDCl}_3$ )

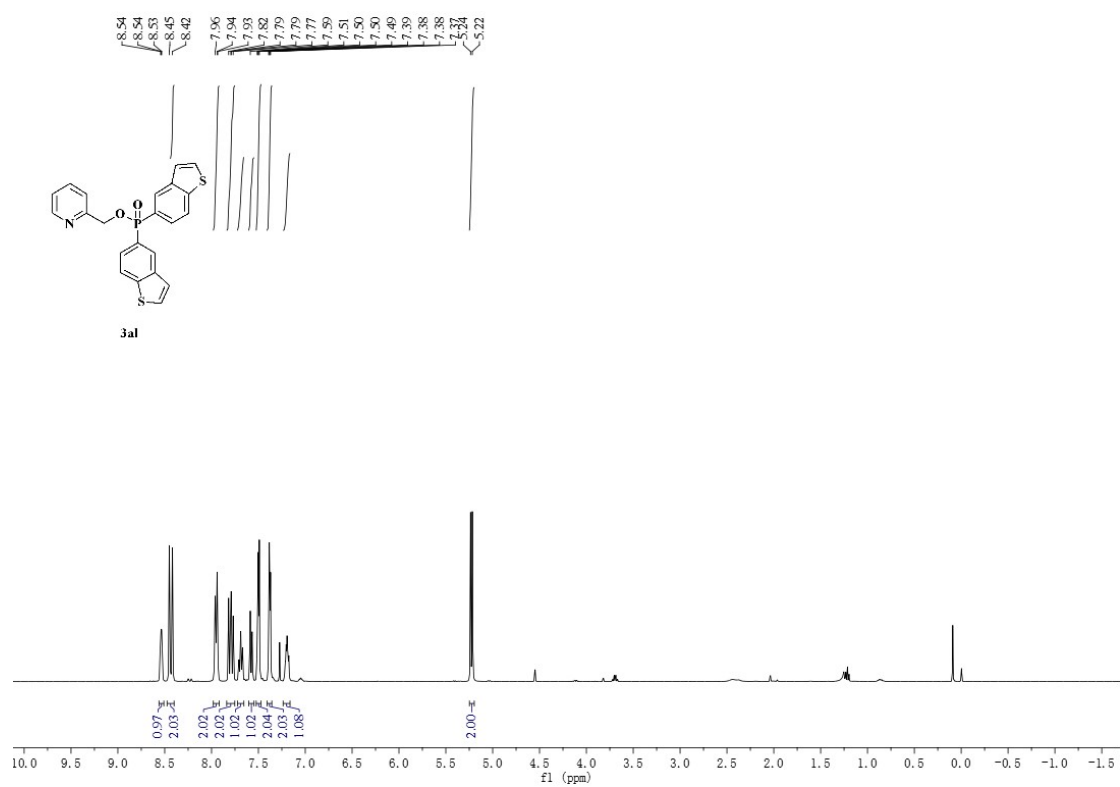

$^{13}\text{C}$  NMR of **3al** (101 MHz,  $\text{CDCl}_3$ )

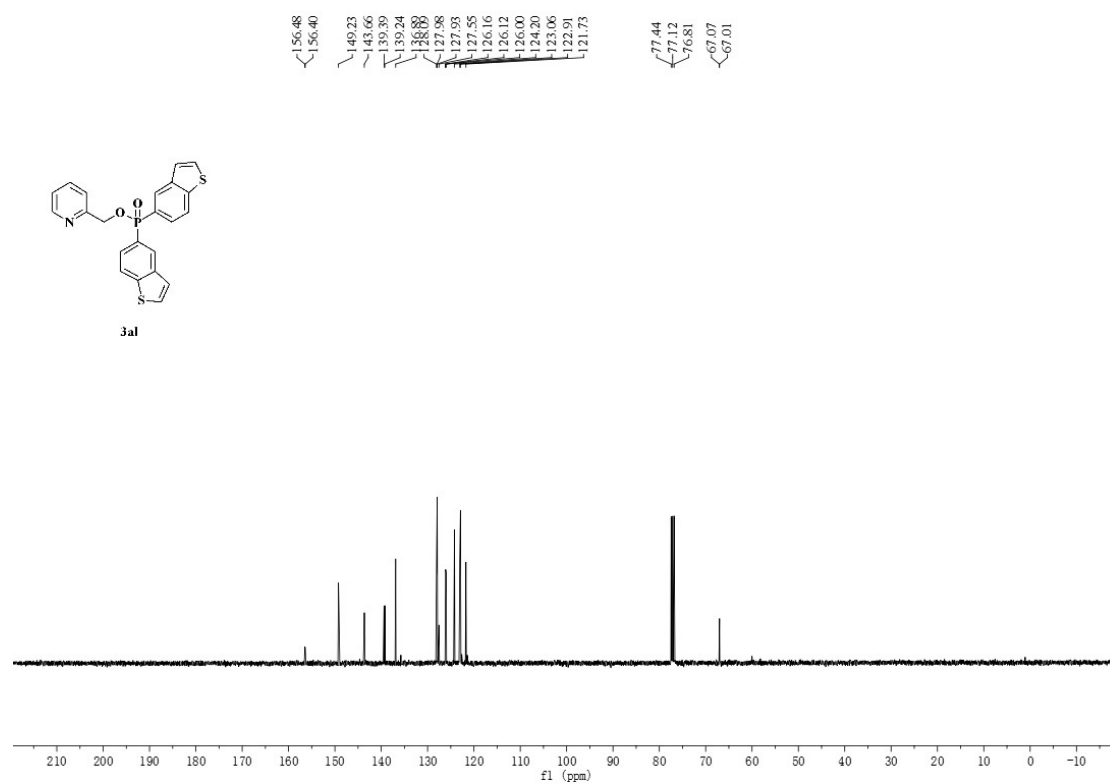

$^{31}\text{P}$  NMR of **3al** (121 MHz,  $\text{CDCl}_3$ )

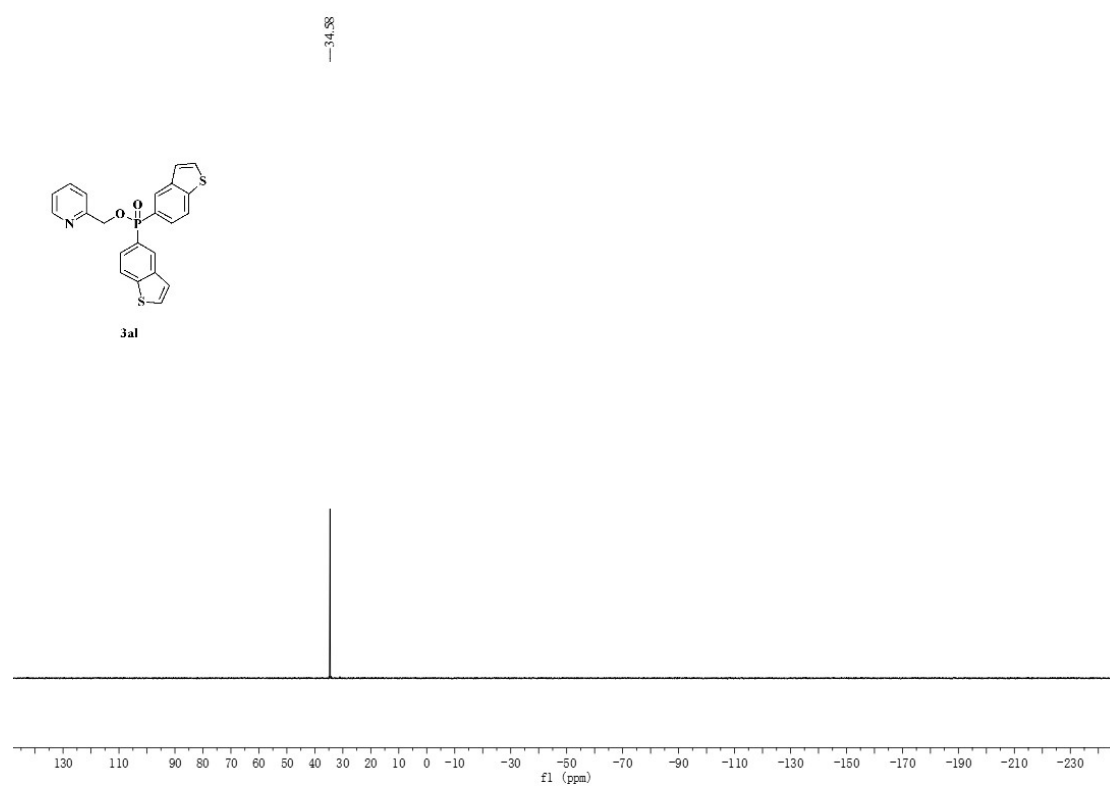

$^1\text{H}$  NMR of **3am** (400 MHz,  $\text{CDCl}_3$ )

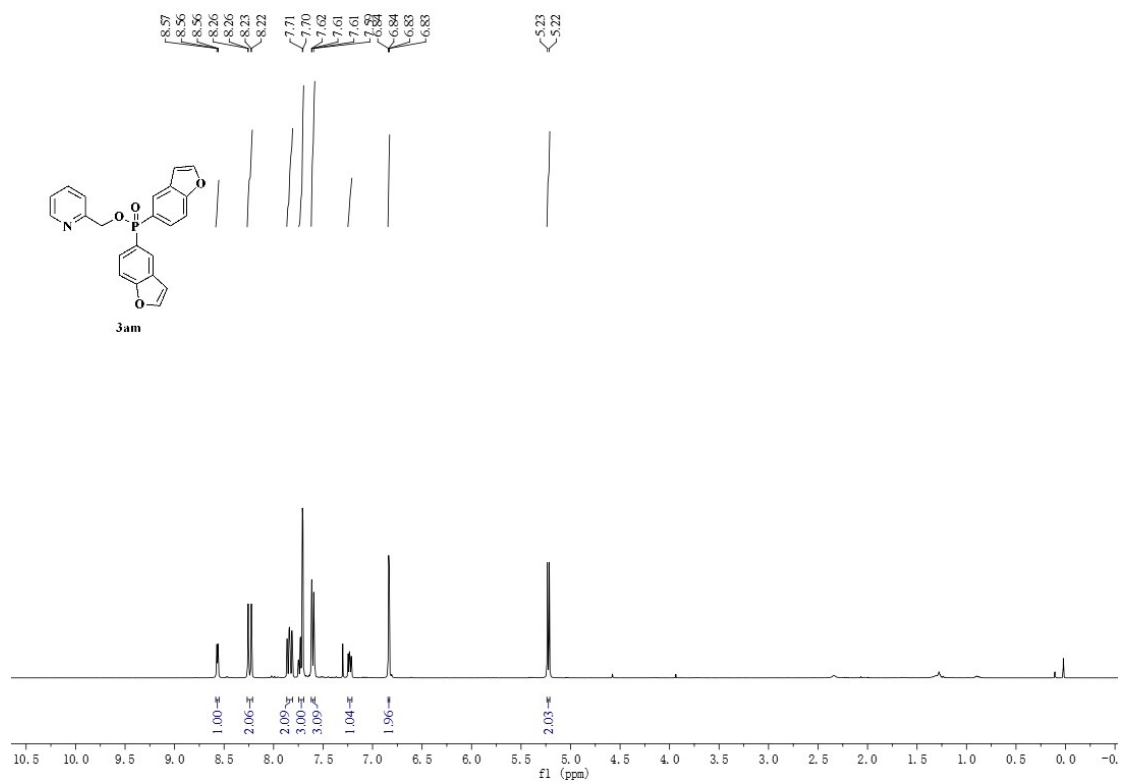

$^{13}\text{C}$  NMR of **3am** (101 MHz,  $\text{CDCl}_3$ )

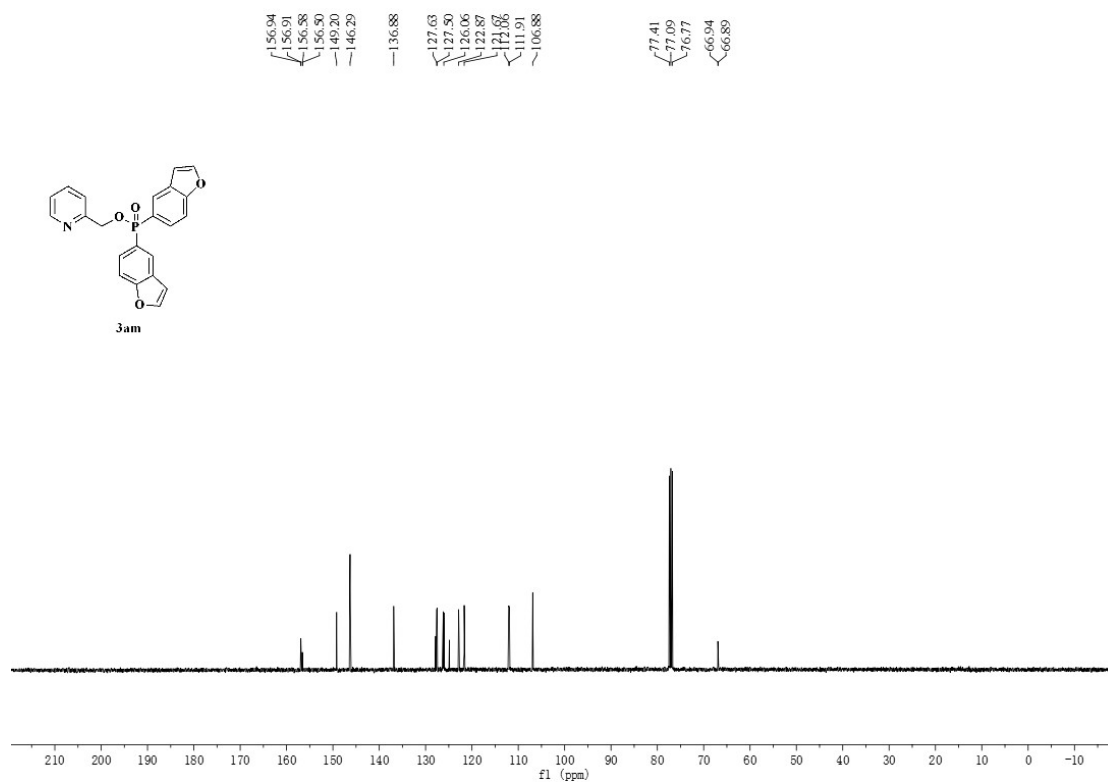

$^{31}\text{P}$  NMR of **3an** (121 MHz,  $\text{CDCl}_3$ )

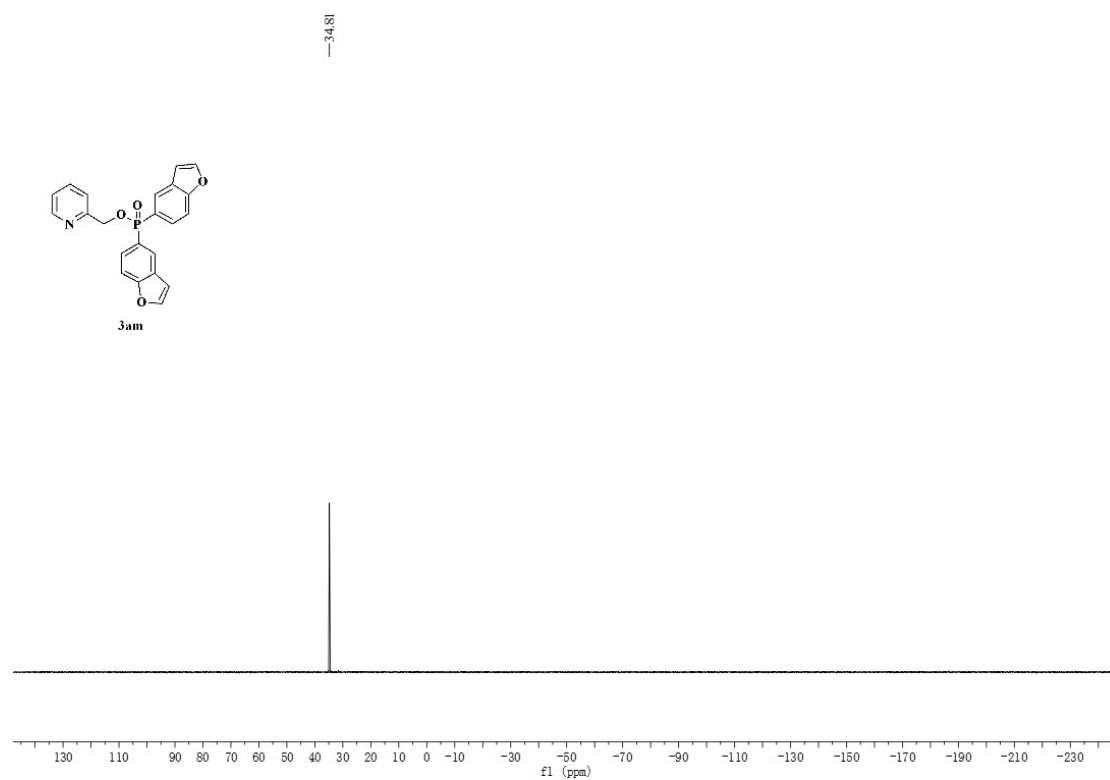

$^1\text{H}$  NMR of **3an** (400 MHz,  $\text{CDCl}_3$ )

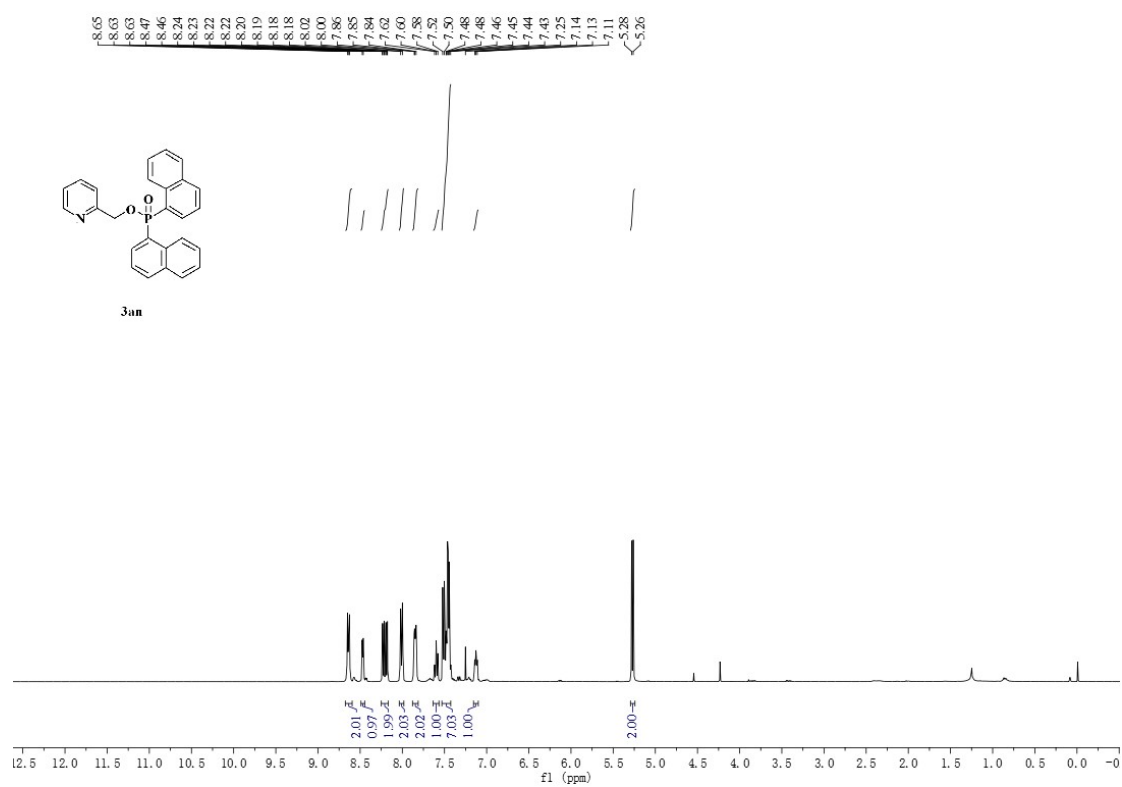



$^{13}\text{C}$  NMR of **3an** (101 MHz,  $\text{CDCl}_3$ )

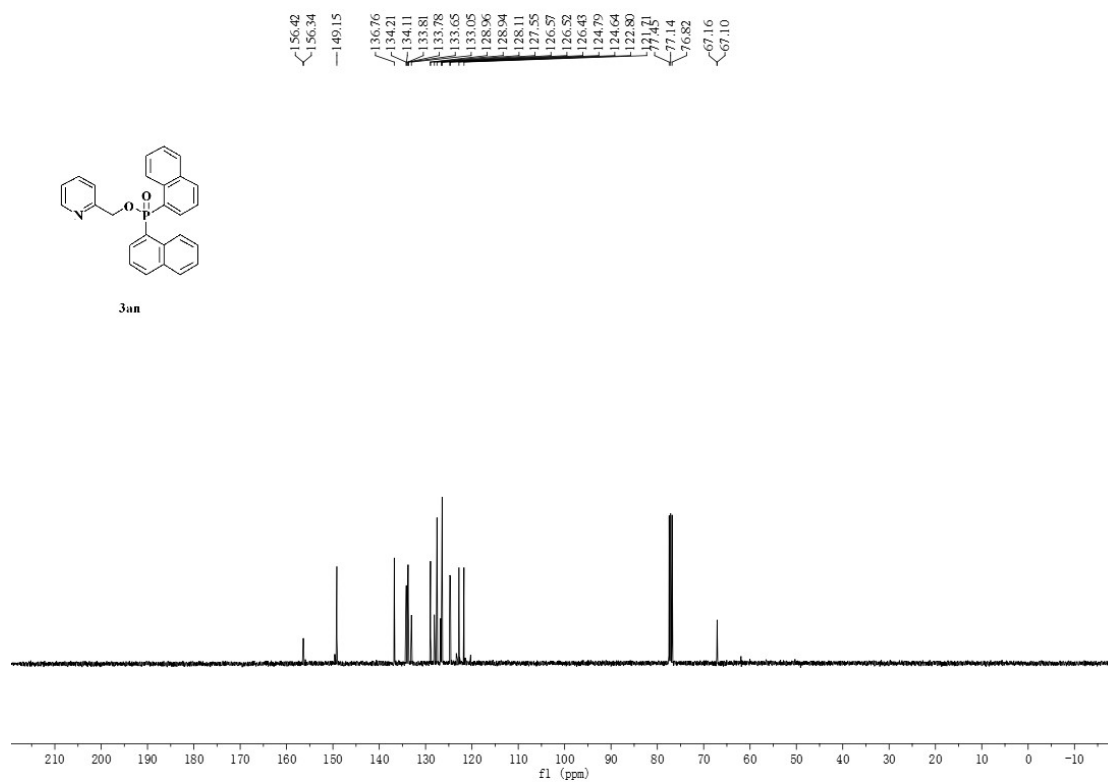

$^{31}\text{P}$  NMR of **3an** (121 MHz,  $\text{CDCl}_3$ )

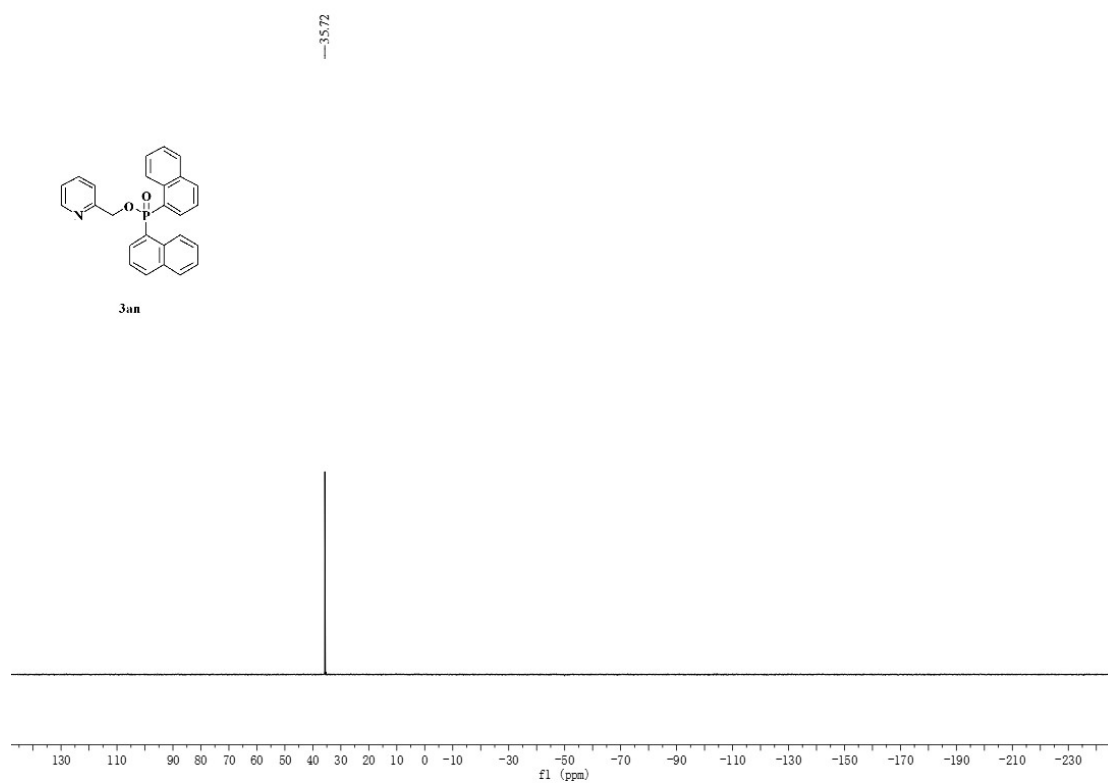

$^1\text{H}$  NMR of **3ao** (400 MHz,  $\text{CDCl}_3$ )

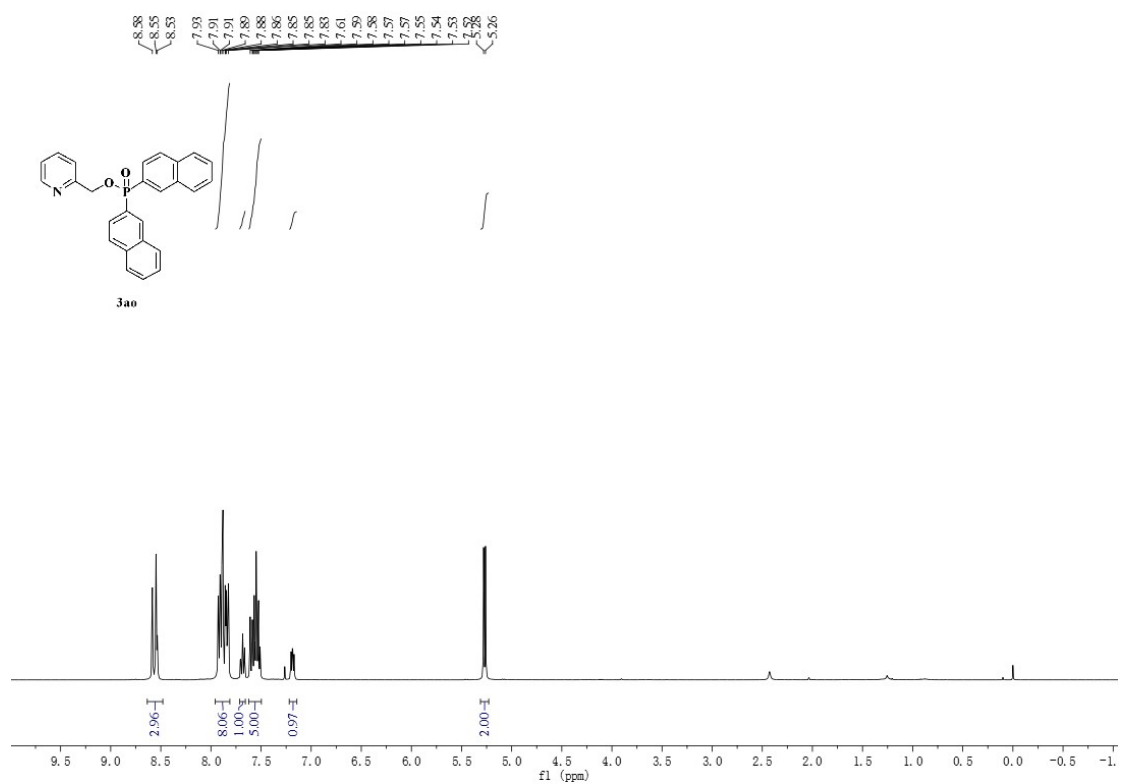

$^{13}\text{C}$  NMR of **3ao** (101 MHz,  $\text{CDCl}_3$ )

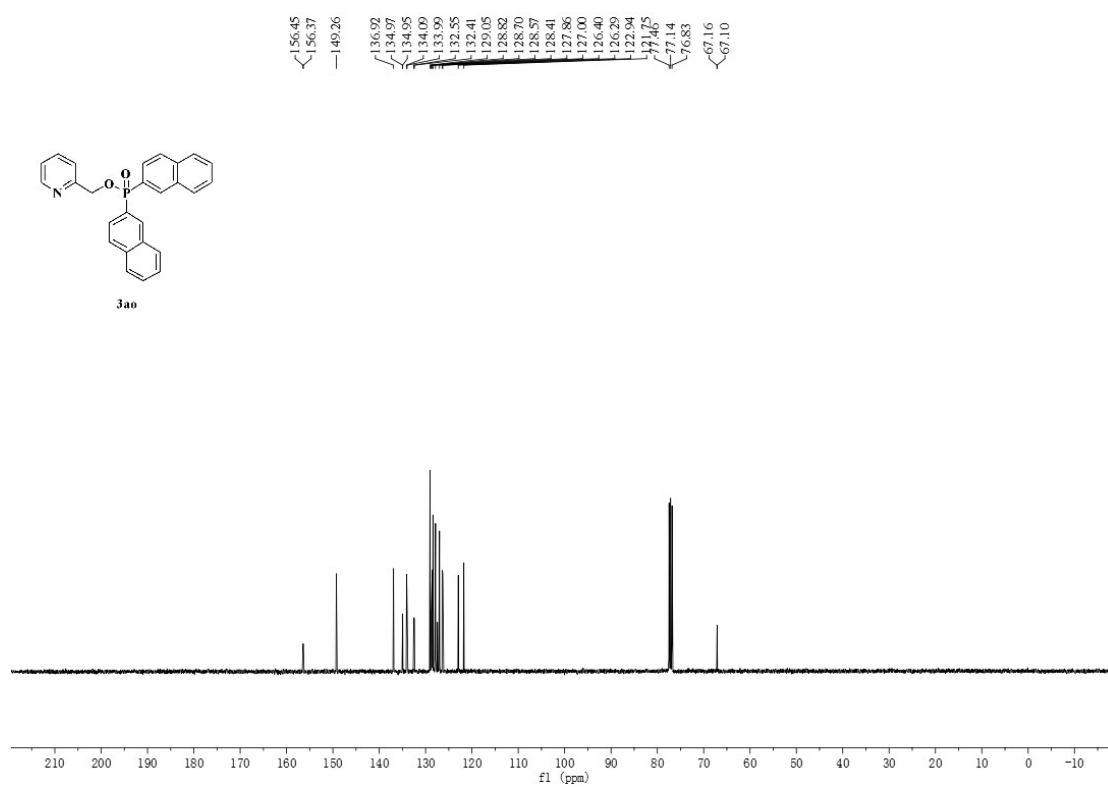

$^{31}\text{P}$  NMR of **3ao** (121 MHz,  $\text{CDCl}_3$ )

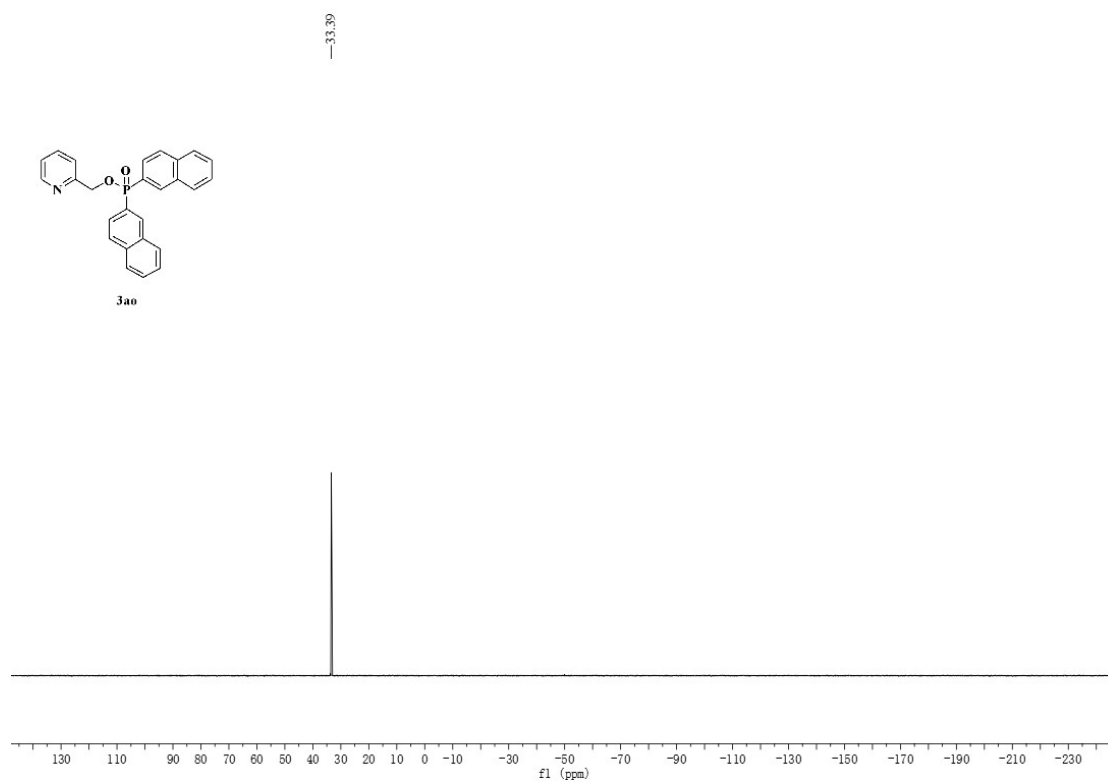

$^1\text{H}$  NMR of **3ap** (400 MHz,  $\text{CDCl}_3$ )

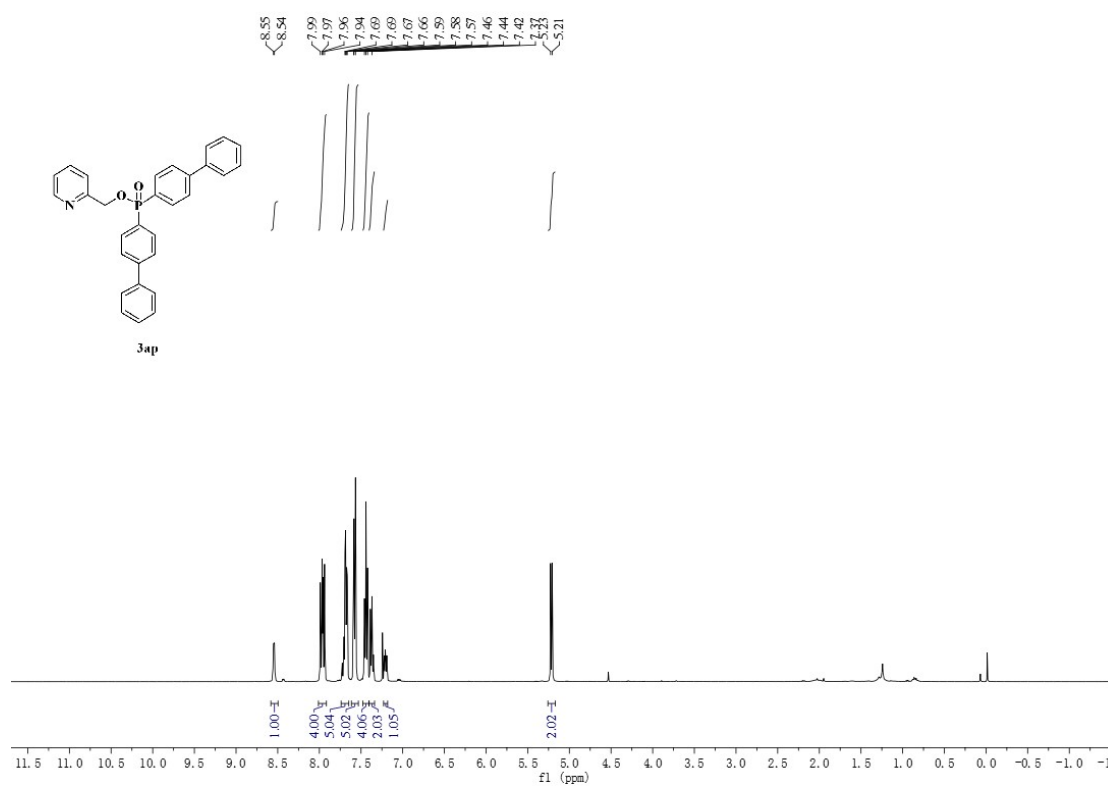

$^{13}\text{C}$  NMR of **3ap** (101 MHz,  $\text{CDCl}_3$ )

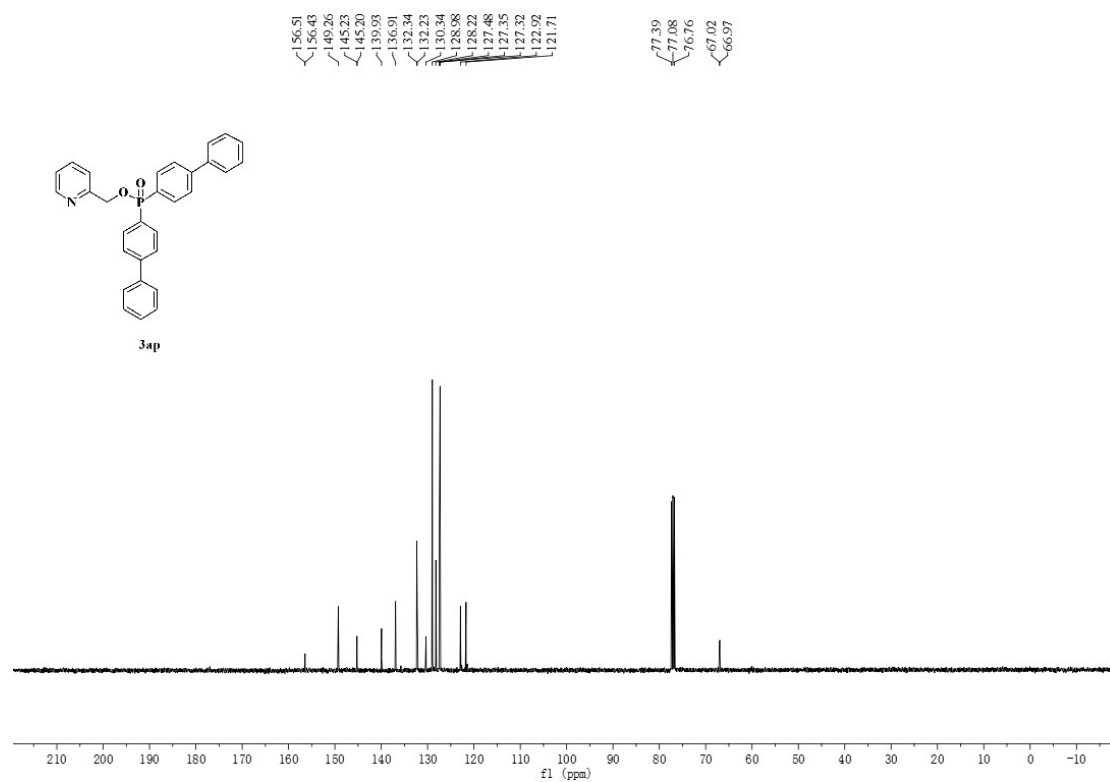

$^{31}\text{P}$  NMR of **3ap** (121 MHz,  $\text{CDCl}_3$ )

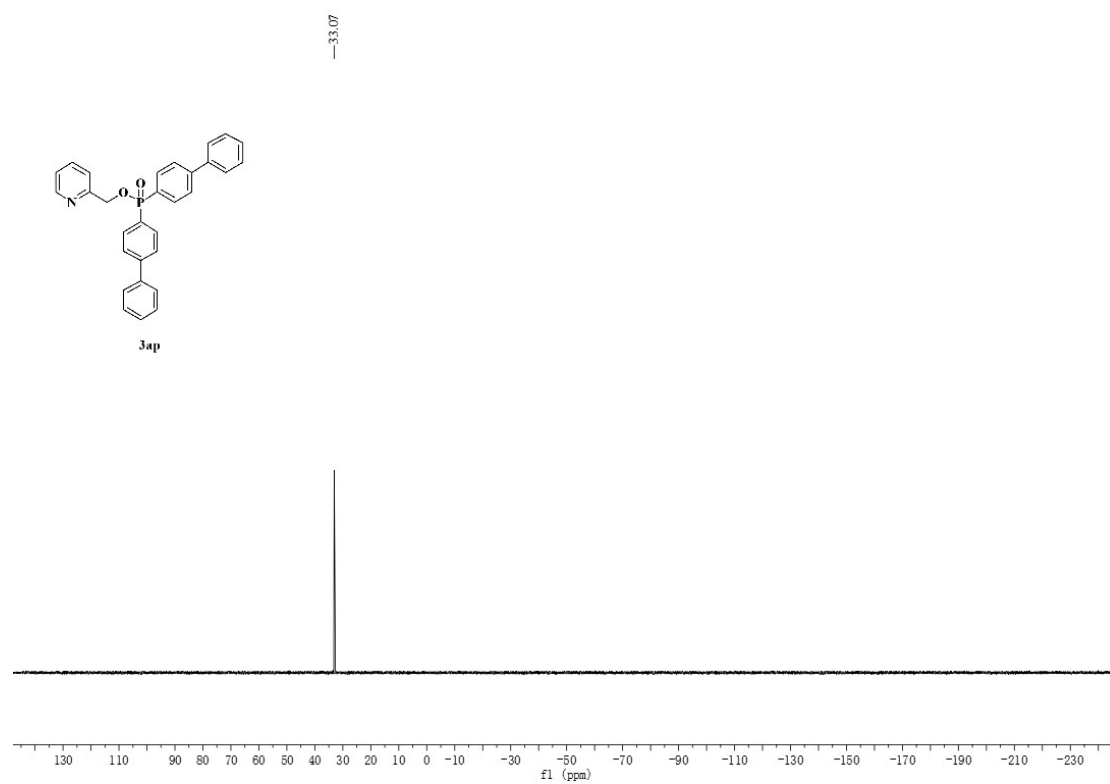

$^1\text{H}$  NMR of **3aq** (400 MHz,  $\text{CDCl}_3$ )

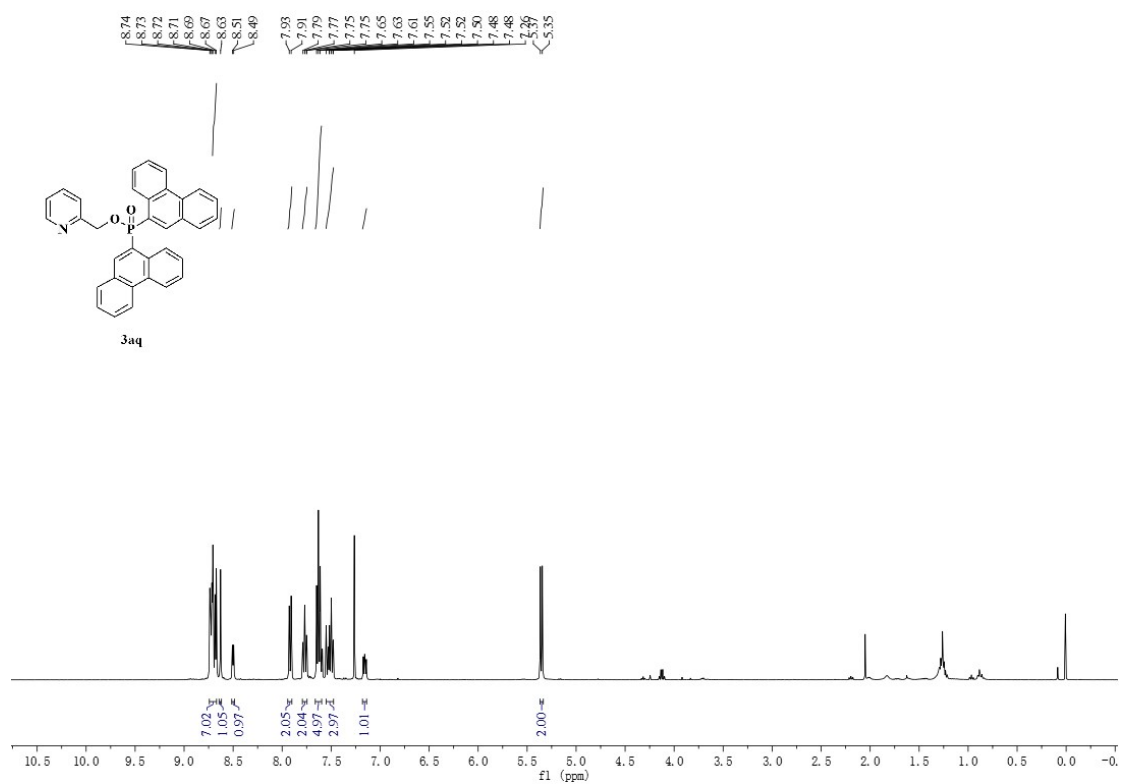

$^{13}\text{C}$  NMR of **3aq** (101 MHz,  $\text{CDCl}_3$ )

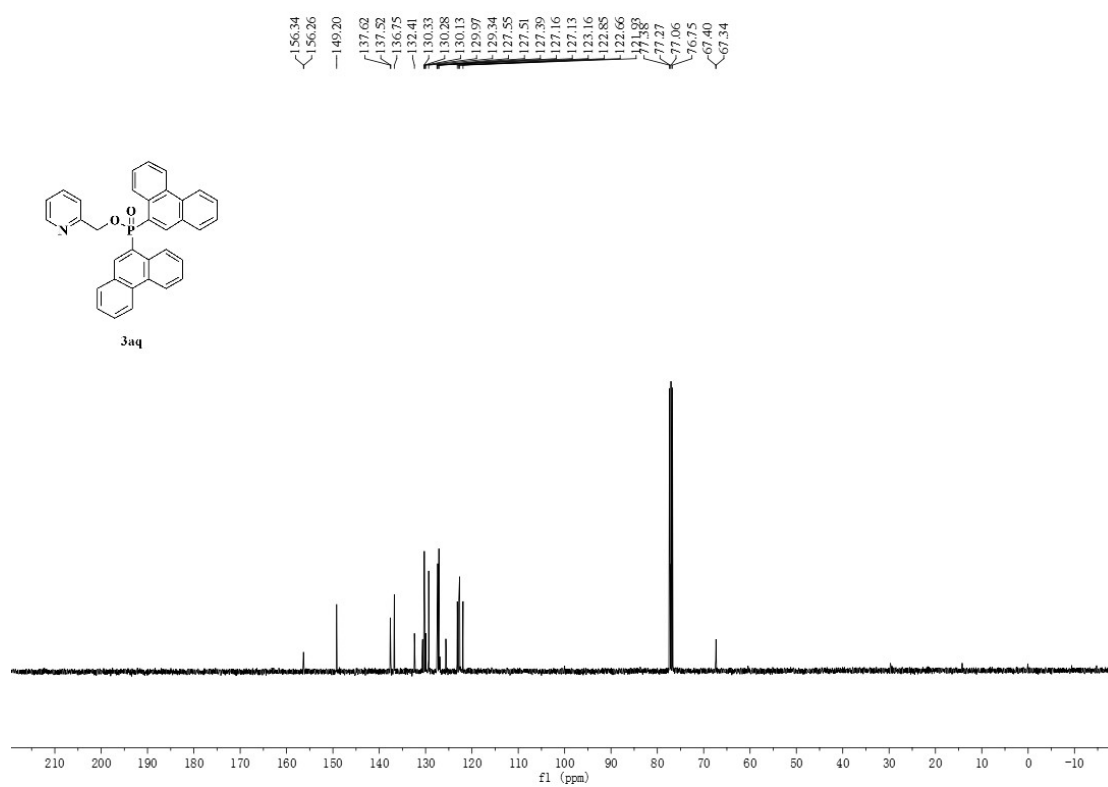

$^{31}\text{P}$  NMR of **3aq** (121 MHz,  $\text{CDCl}_3$ )

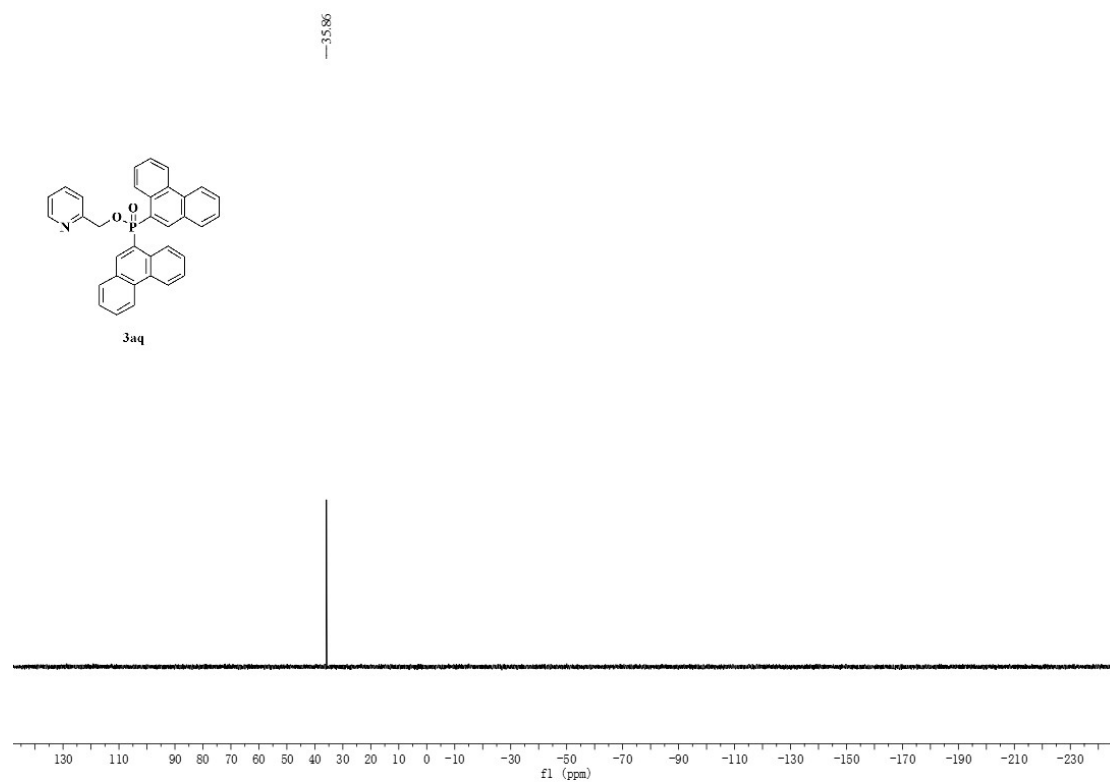

$^1\text{H}$  NMR of **3ar** (400 MHz,  $\text{CDCl}_3$ )

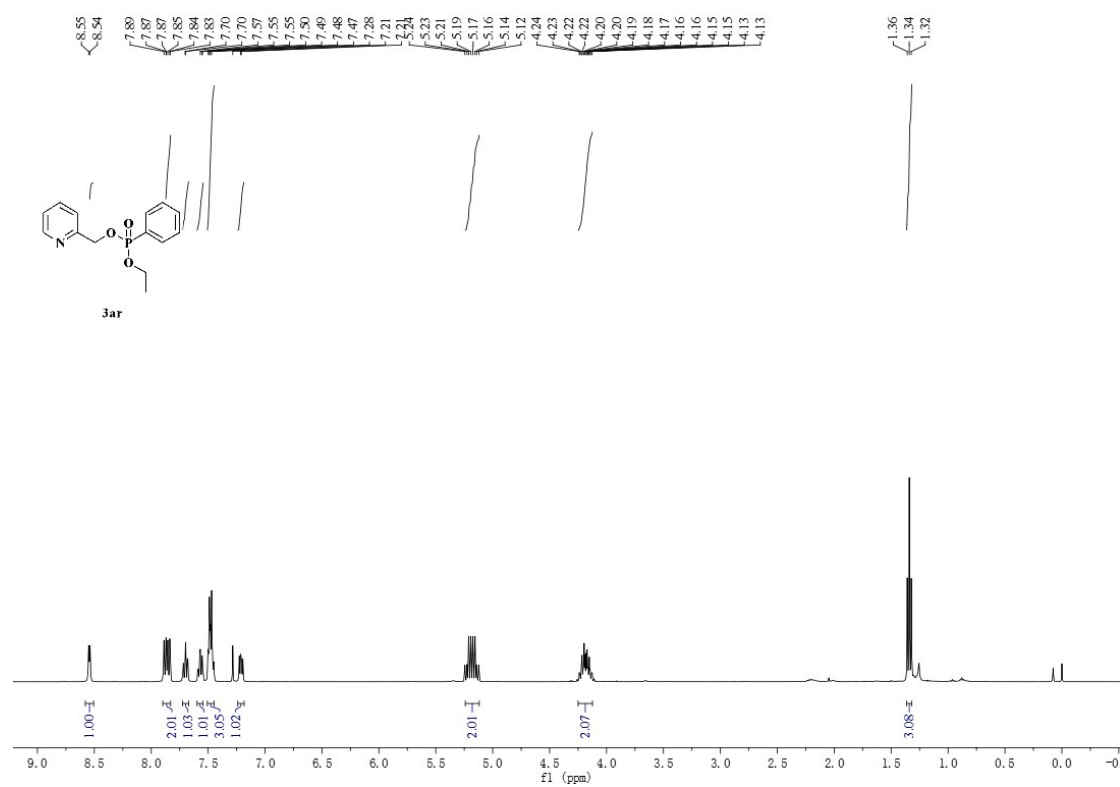

$^{13}\text{C}$  NMR of **3ar** (101 MHz,  $\text{CDCl}_3$ )

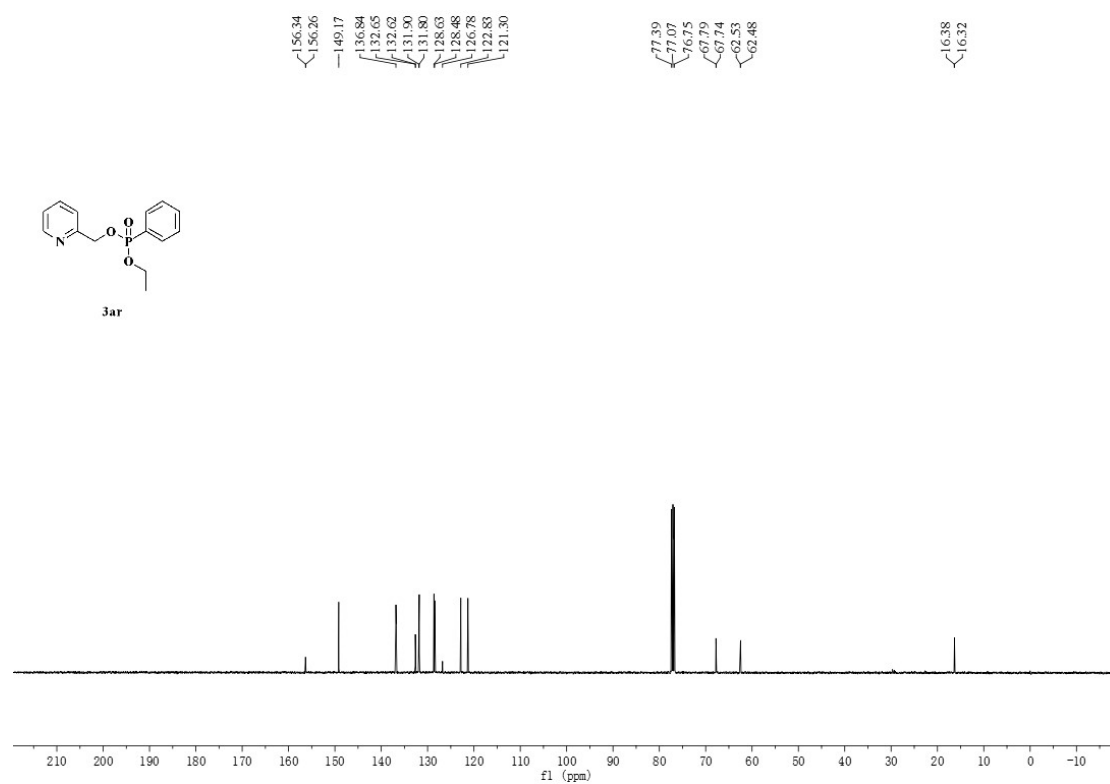

$^{31}\text{P}$  NMR of **3ar** (121 MHz,  $\text{CDCl}_3$ )

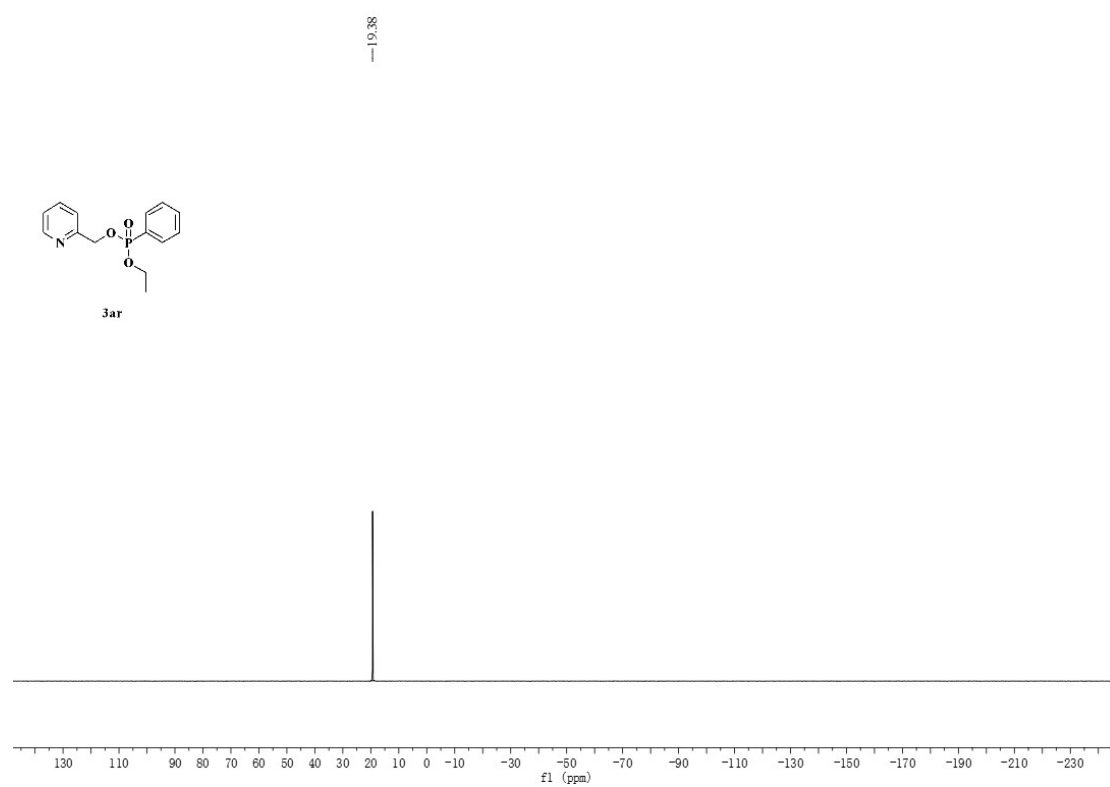

**3as**

Chemical structure of **3as** is shown above the spectrum. The structure consists of a pyridine ring attached via a methylene group to a phosphorus atom. The phosphorus atom is also bonded to a phenyl ring and a diphenylmethyl group (a methylene group connected to two phenyl rings).

<sup>1</sup>H NMR spectrum (CDCl<sub>3</sub>) of **3as**. The x-axis represents the chemical shift in ppm, ranging from -0.5 to 9.5. The spectrum shows several peaks corresponding to the protons in the molecule. Integration values are provided below the baseline: 1.00, 1.01, 1.04, 1.07, 1.06, 4.00, 4.95, 4.04, 1.12, 1.10.

**3as**

c1ccc(cc1)P(=O)(c2ccc(cc2))OCc3ccncc3

156.63, 156.55, 149.01, 136.75, 132.96, 132.00, 131.98, 131.71, 131.68, 131.66, 131.60, 131.54, 131.42, 129.76, 128.09, 127.95, 127.38, 127.28, 126.91, 126.79, 122.69, 121.87, 77.07, 76.75, 66.49, 66.44

210 200 190 180 170 160 150 140 130 120 110 100 90 80 70 60 50 40 30 20 10 0 -10

f1 (ppm)



$^{31}\text{P}$  NMR of **3as** (121 MHz,  $\text{CDCl}_3$ )

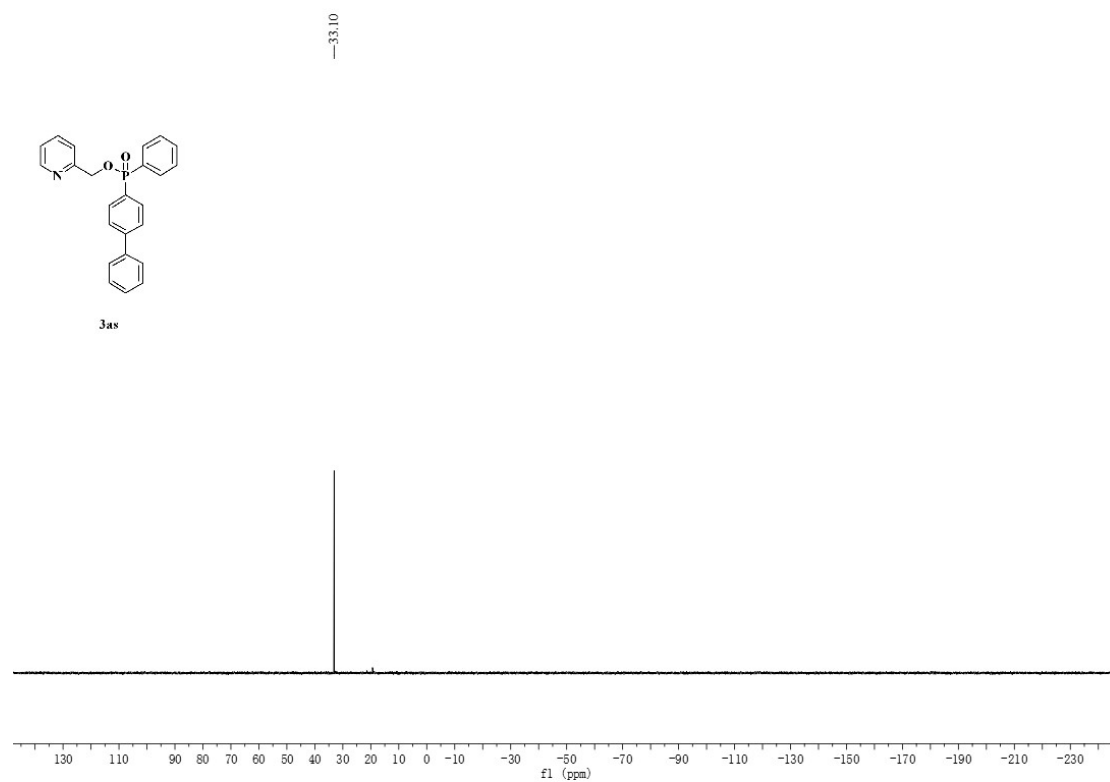

$^1\text{H}$  NMR of **3at** (400 MHz,  $\text{CDCl}_3$ )

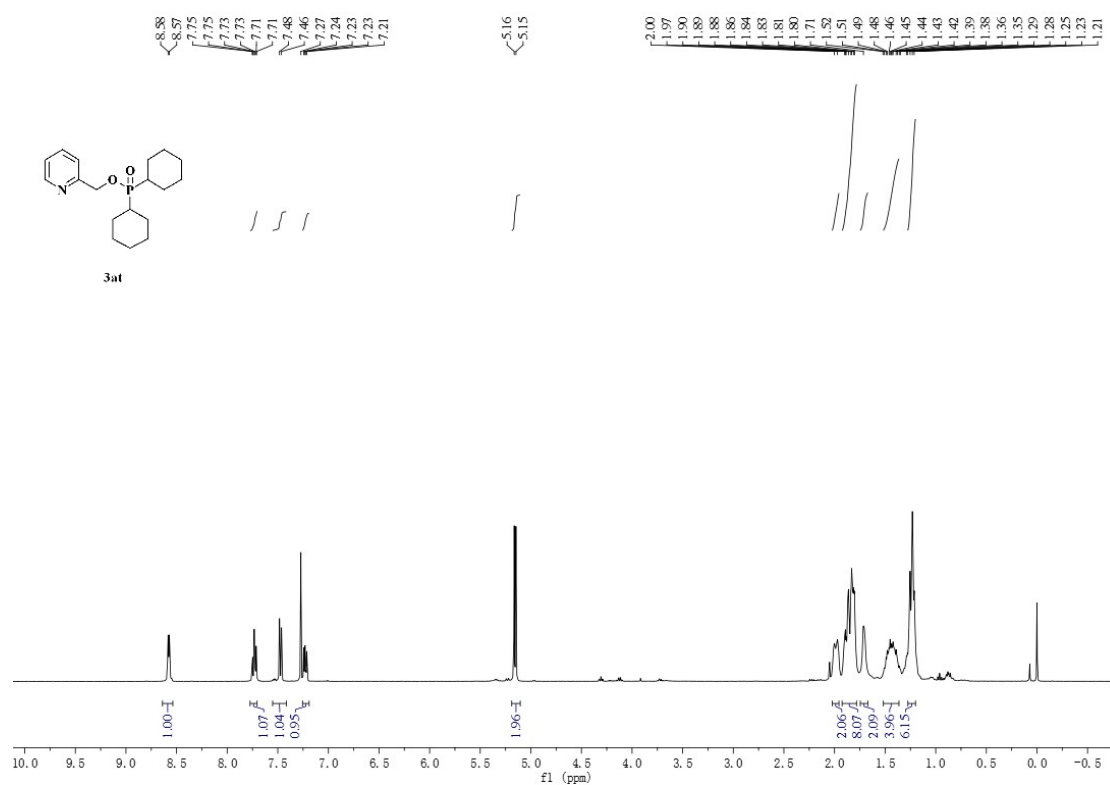

$^{13}\text{C}$  NMR of **3at** (101 MHz,  $\text{CDCl}_3$ )

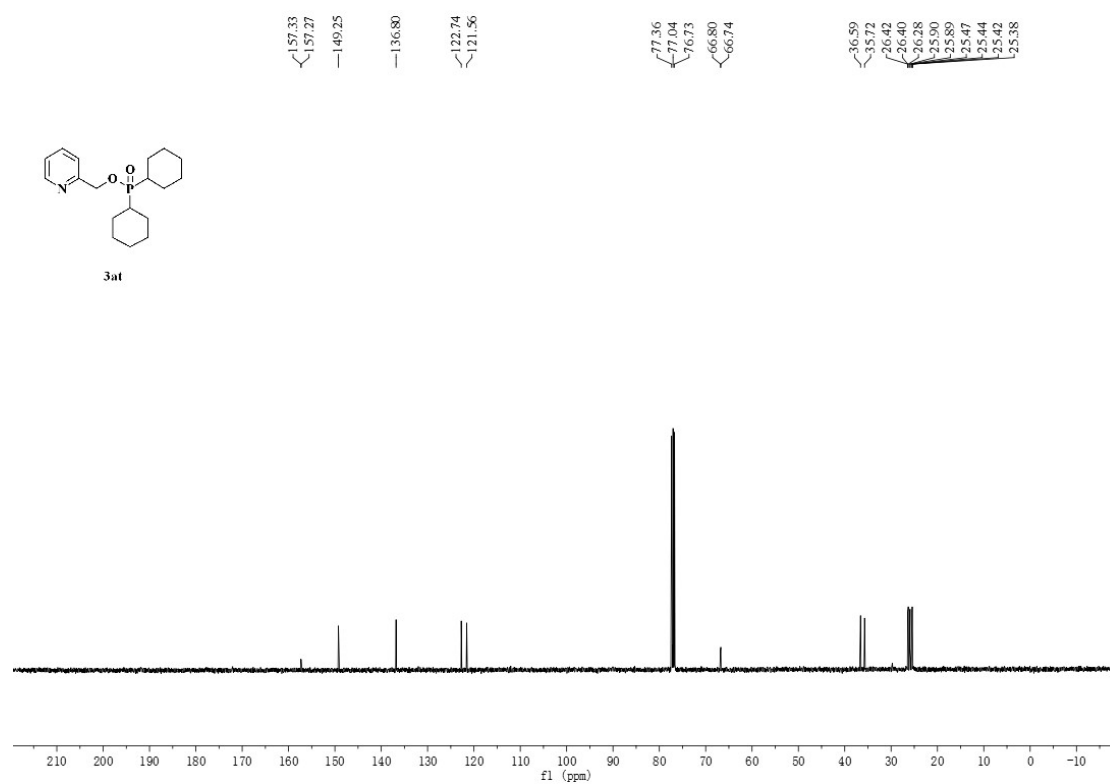

$^{31}\text{P}$  NMR of **3at** (121 MHz,  $\text{CDCl}_3$ )

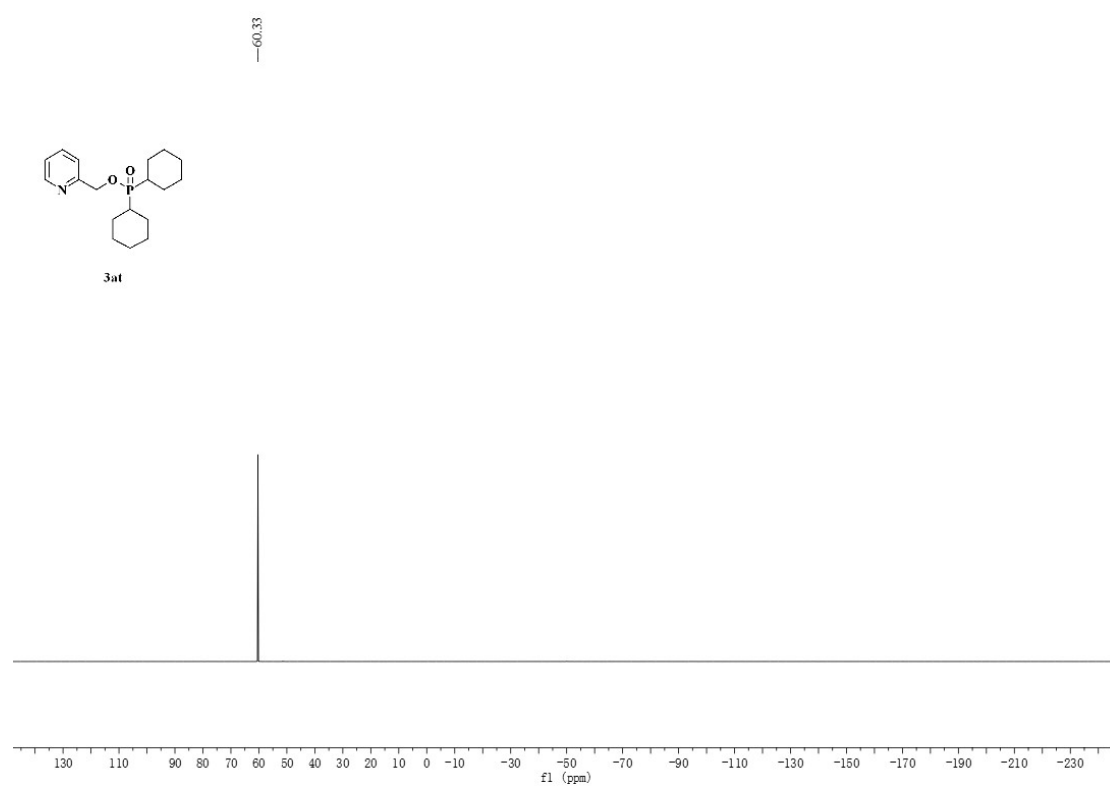

$^1\text{H}$  NMR of **3au** (400 MHz,  $\text{CDCl}_3$ )

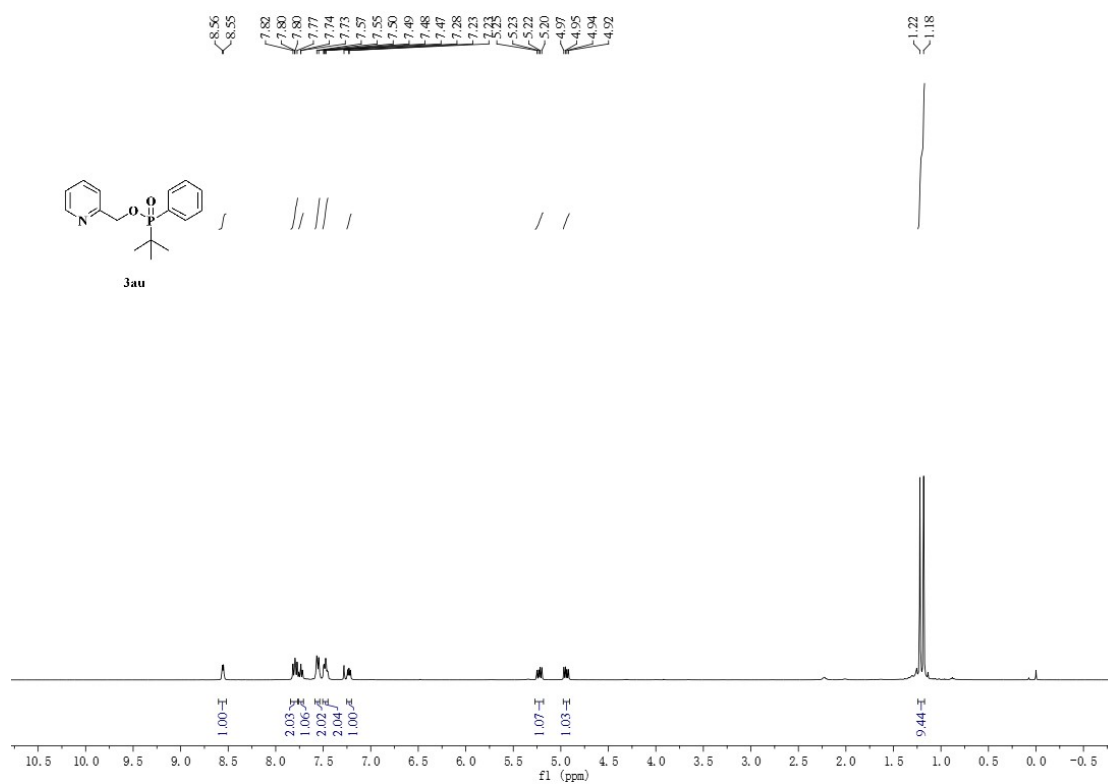

$^{13}\text{C}$  NMR of **3at** (101 MHz,  $\text{CDCl}_3$ )

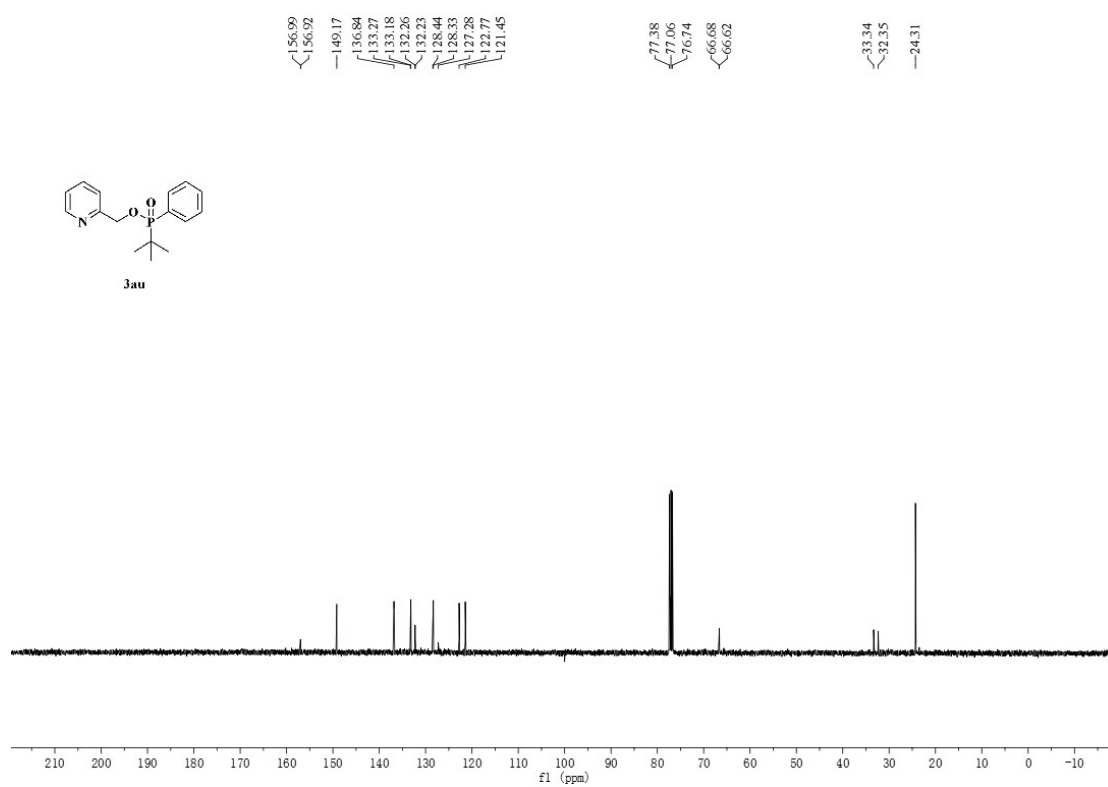

$^{31}\text{P}$  NMR of **3au** (121 MHz,  $\text{CDCl}_3$ )

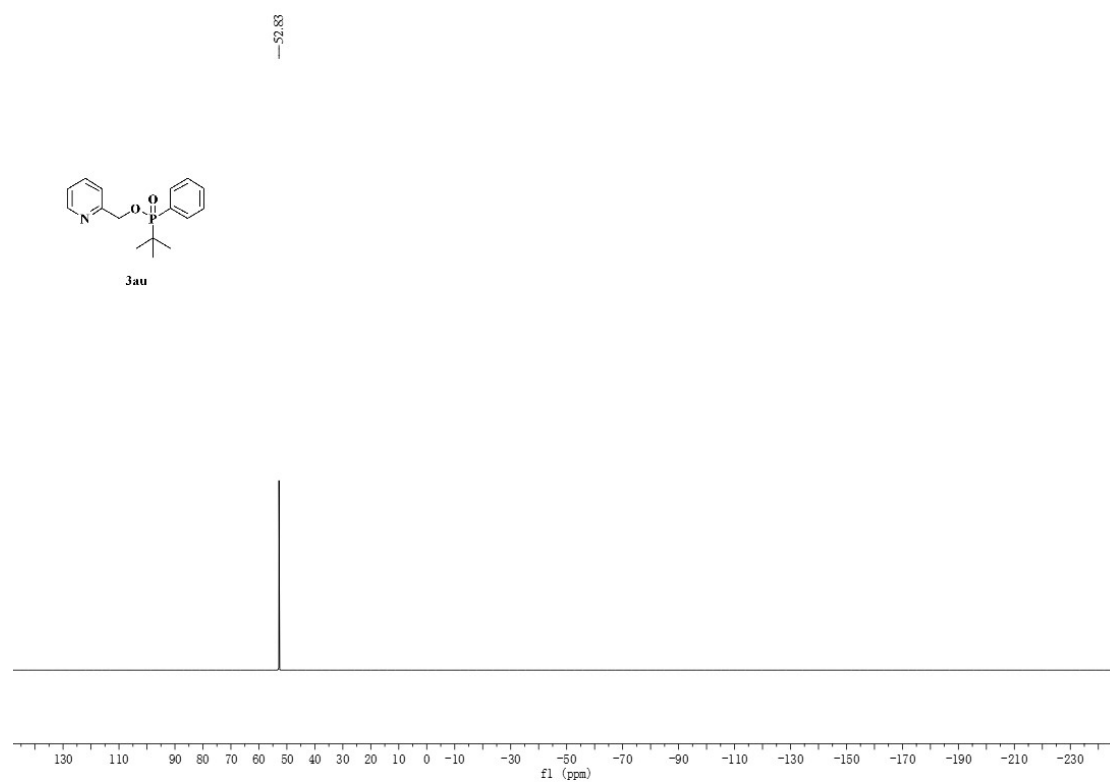

$^1\text{H}$  NMR of **3ba** (400 MHz,  $\text{CDCl}_3$ )

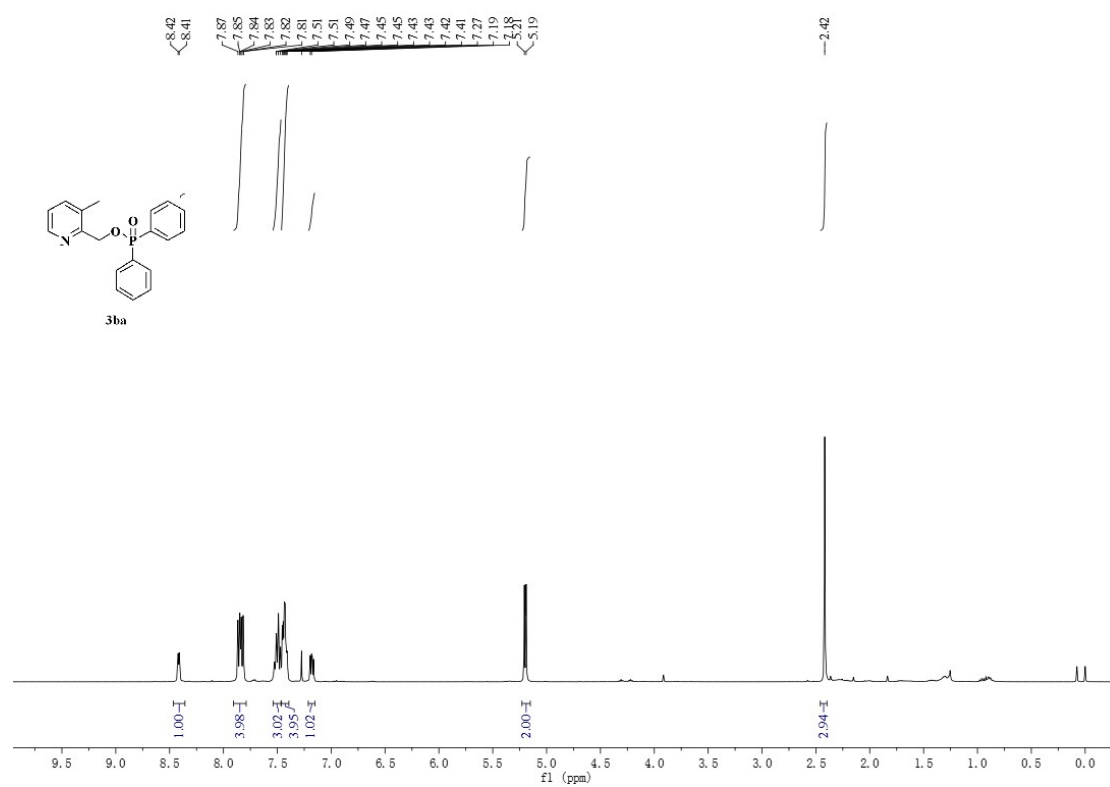



$^1\text{H}$  NMR of **3bb** (400 MHz,  $\text{CDCl}_3$ )

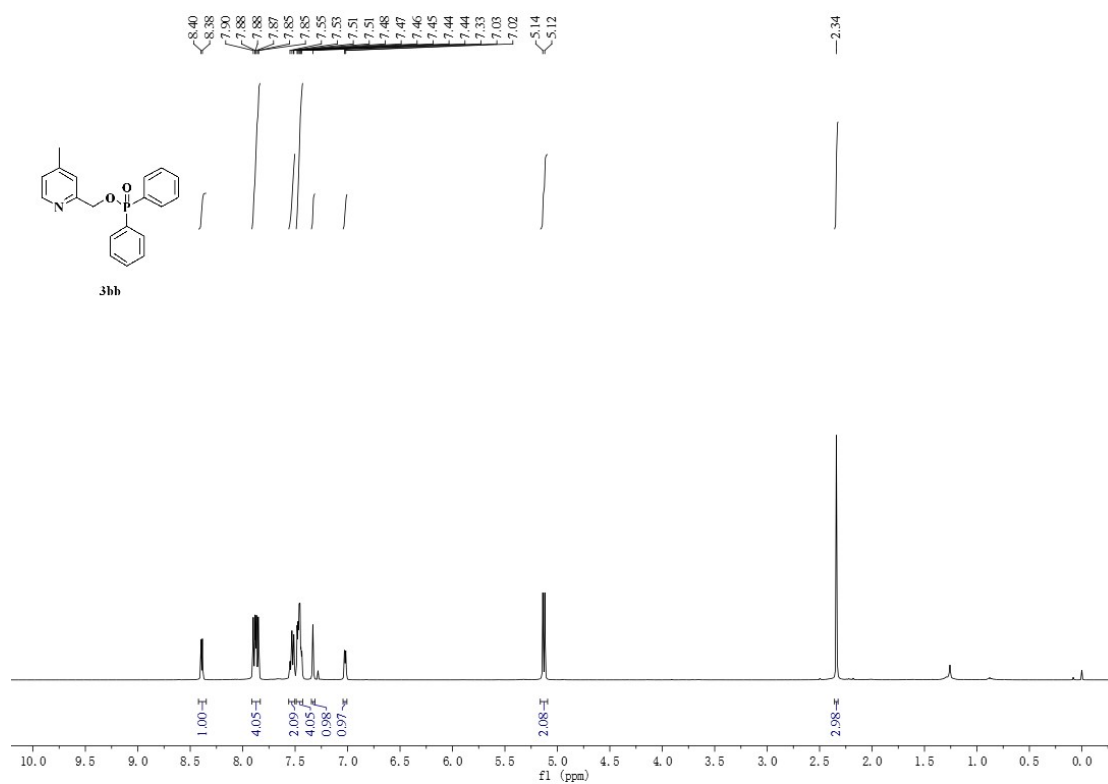

$^{13}\text{C}$  NMR of **3bb** (101 MHz,  $\text{CDCl}_3$ )

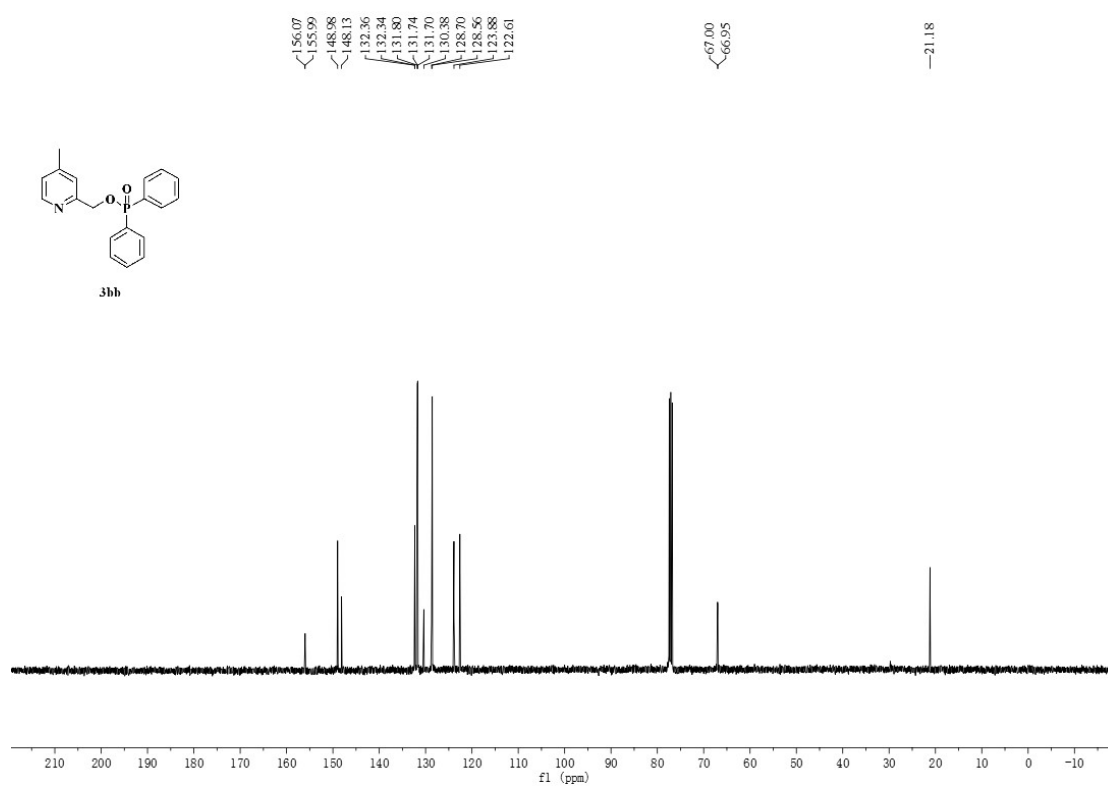

$^{31}\text{P}$  NMR of **3bb** (121 MHz,  $\text{CDCl}_3$ )

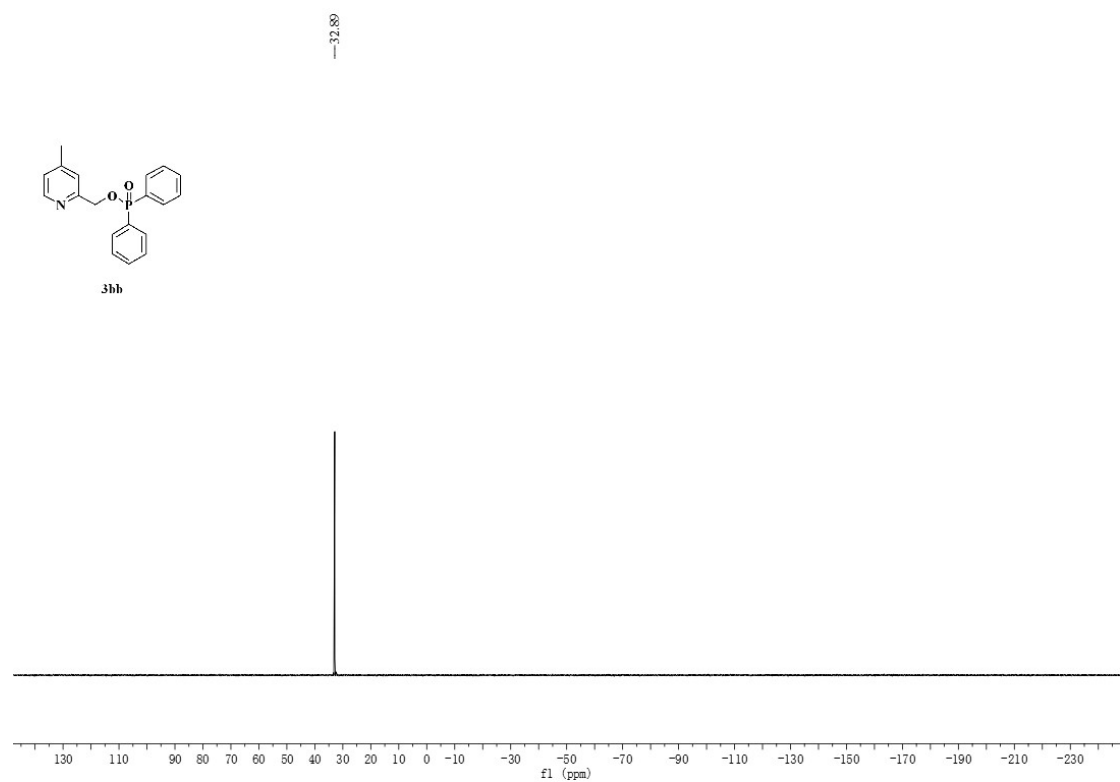

$^1\text{H}$  NMR of **3bc** (400 MHz,  $\text{CDCl}_3$ )

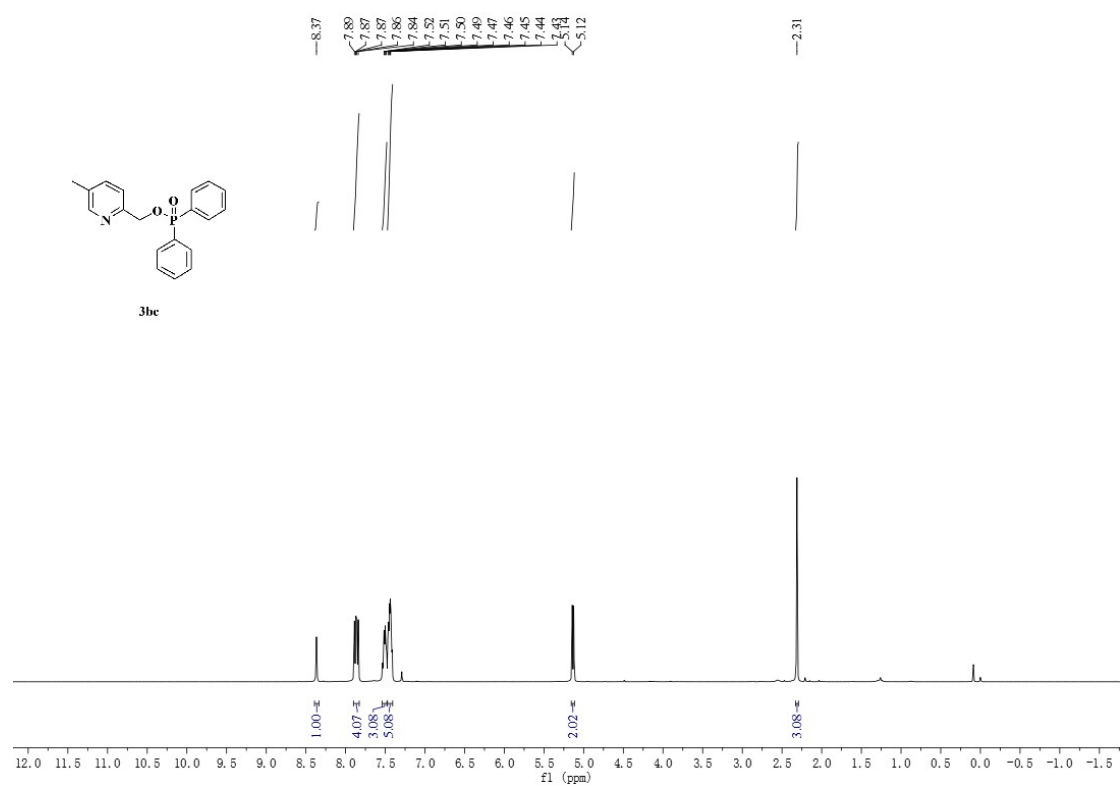

$^{13}\text{C}$  NMR of **3bc** (101 MHz,  $\text{CDCl}_3$ )

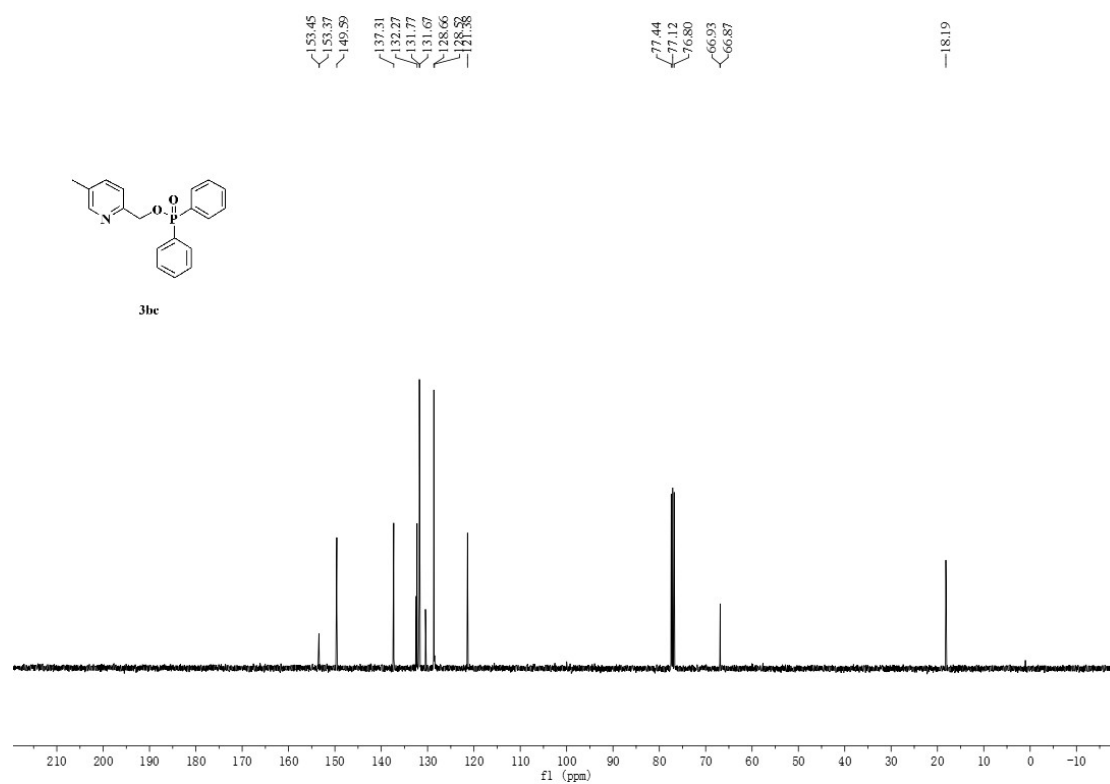

$^{31}\text{P}$  NMR of **3bc** (121 MHz,  $\text{CDCl}_3$ )

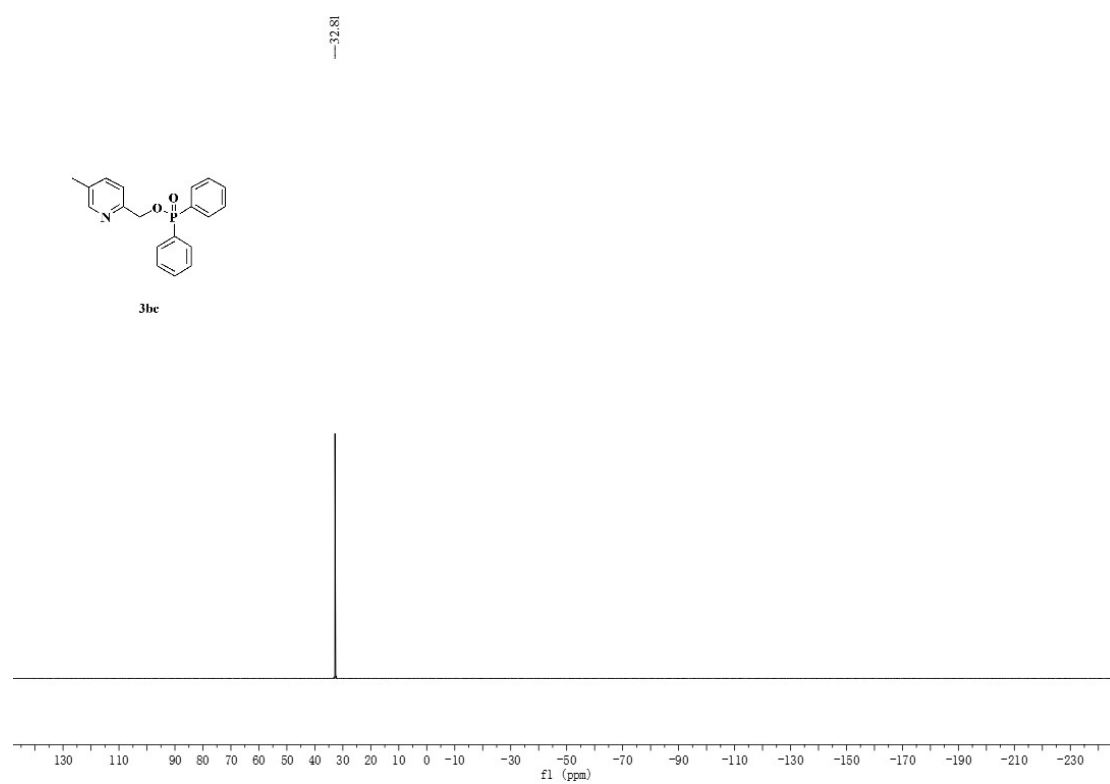



$^1\text{H}$  NMR of **3bd** (400 MHz,  $\text{CDCl}_3$ )

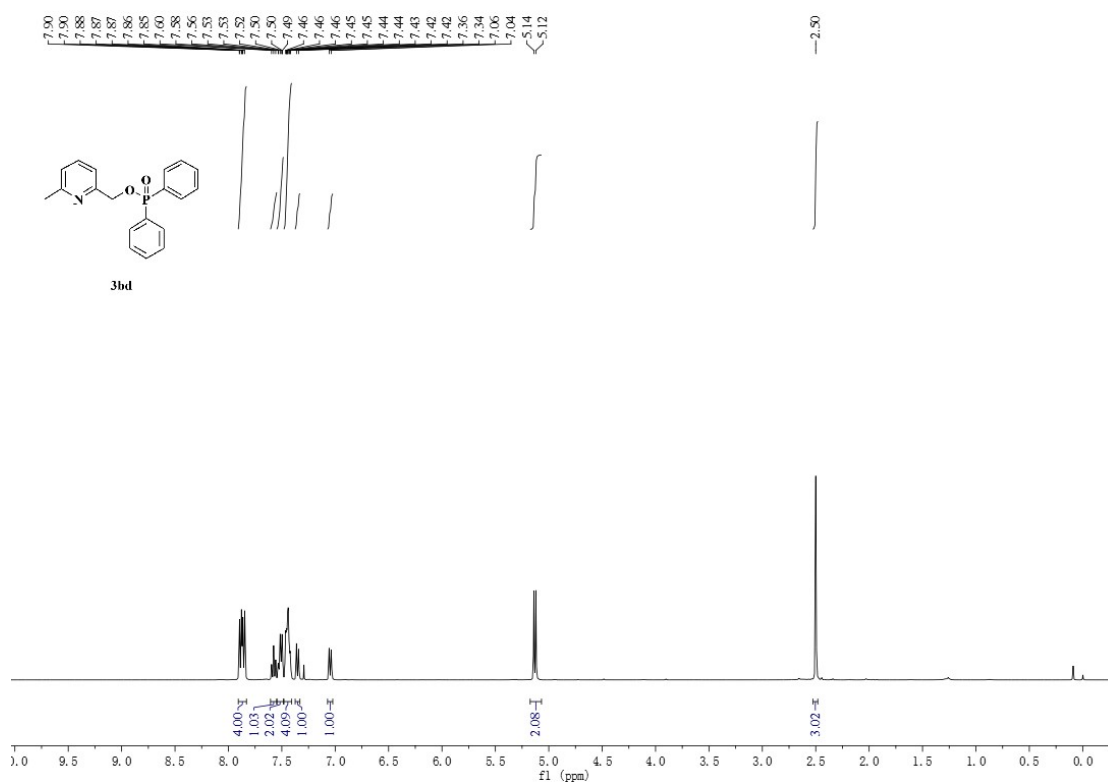

$^{13}\text{C}$  NMR of **3bd** (101 MHz,  $\text{CDCl}_3$ )

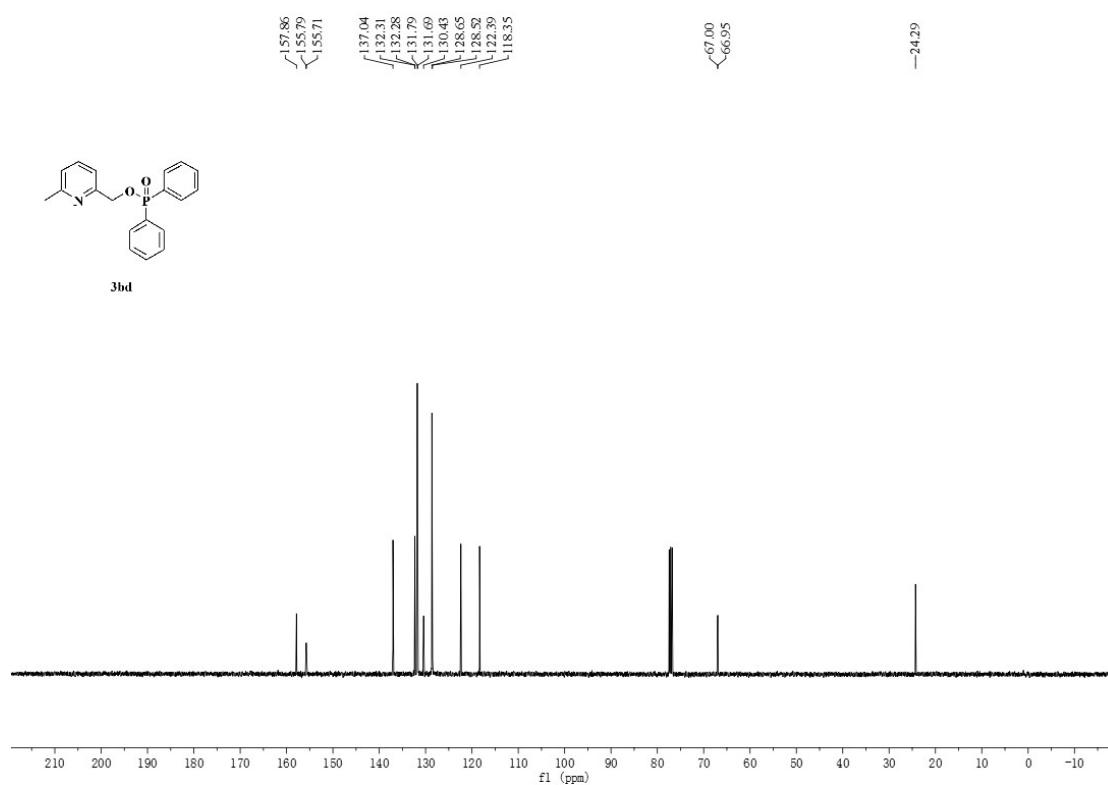

$^{31}\text{P}$  NMR of **3bd** (121 MHz,  $\text{CDCl}_3$ )

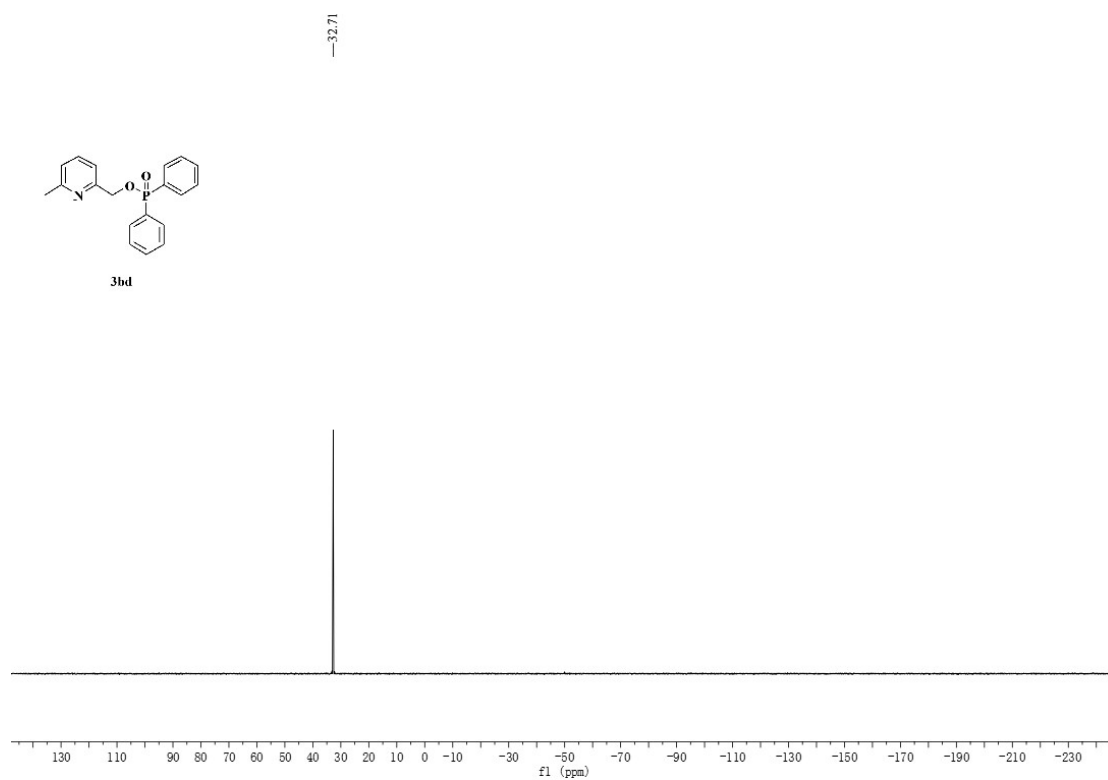

$^1\text{H}$  NMR of **3be** (400 MHz,  $\text{CDCl}_3$ )

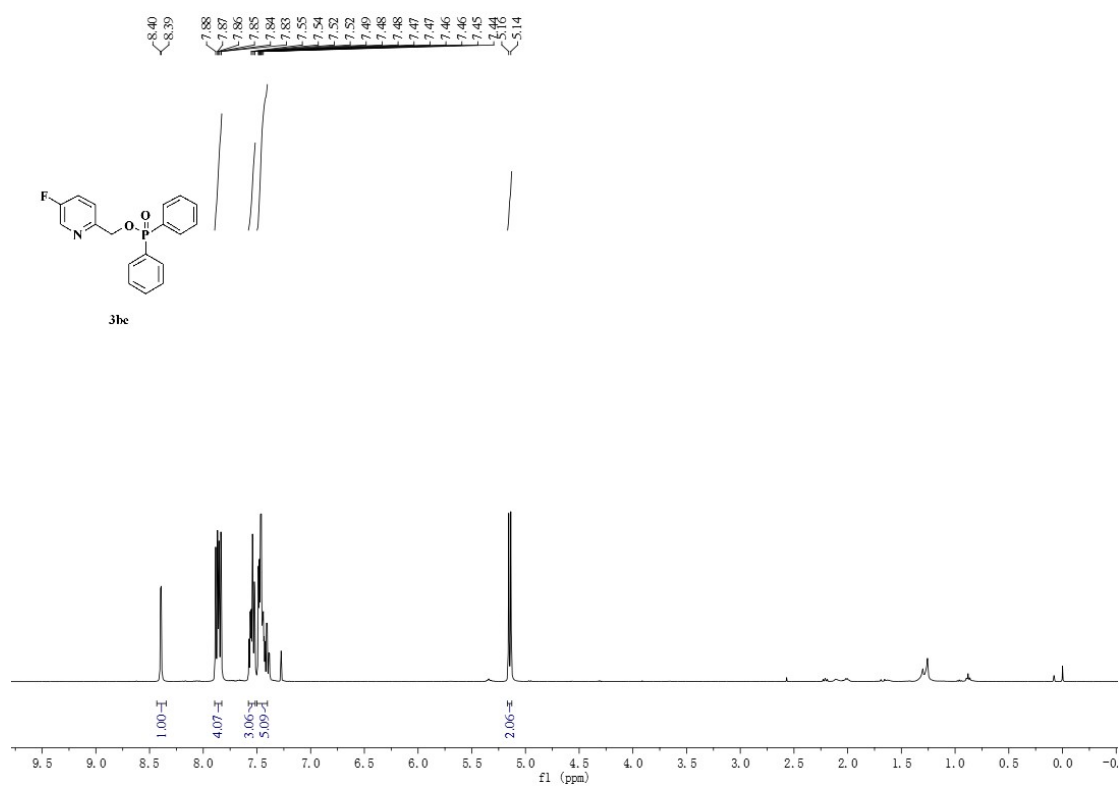

$^{13}\text{C}$  NMR of **3be** (101 MHz,  $\text{CDCl}_3$ )

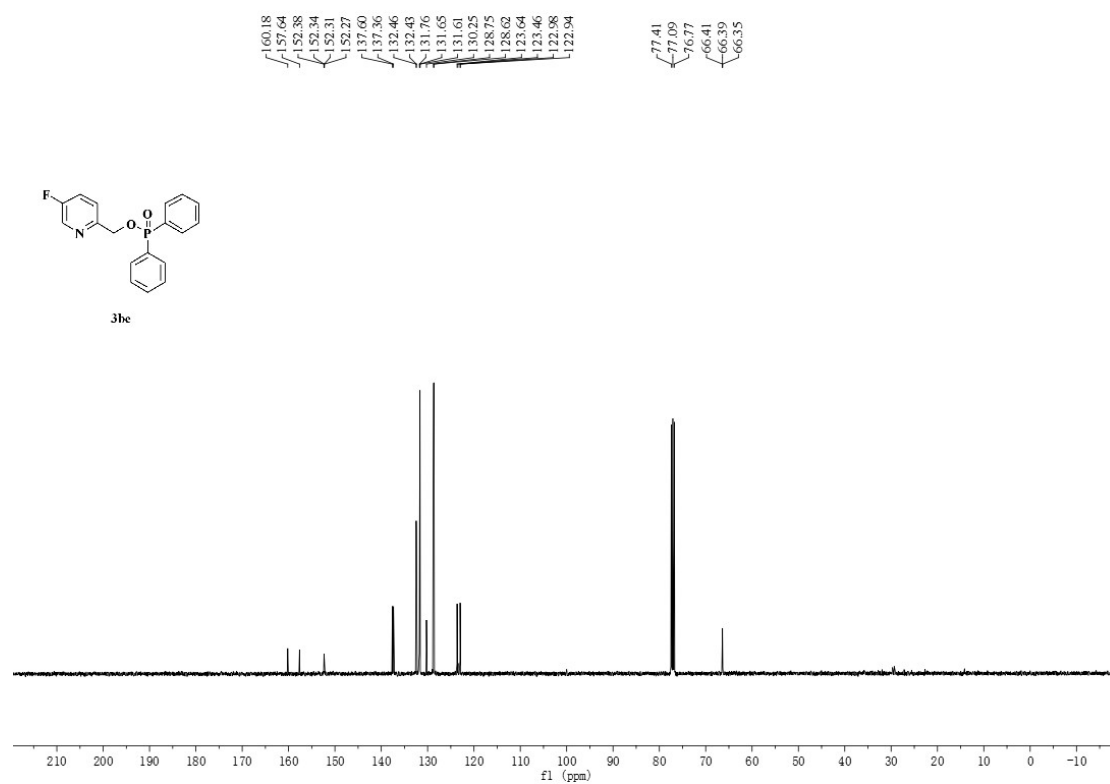

$^{19}\text{F}$  NMR of **3be** (282 MHz,  $\text{CDCl}_3$ )

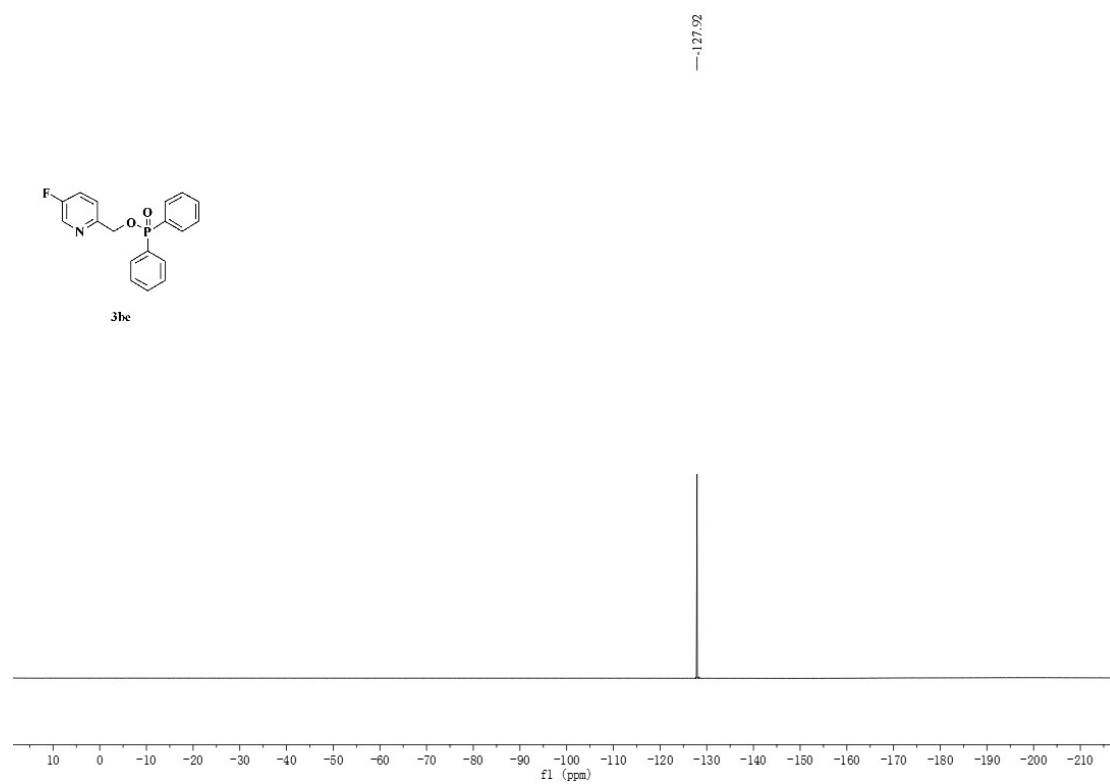

$^{31}\text{P}$  NMR of **3be** (121 MHz,  $\text{CDCl}_3$ )

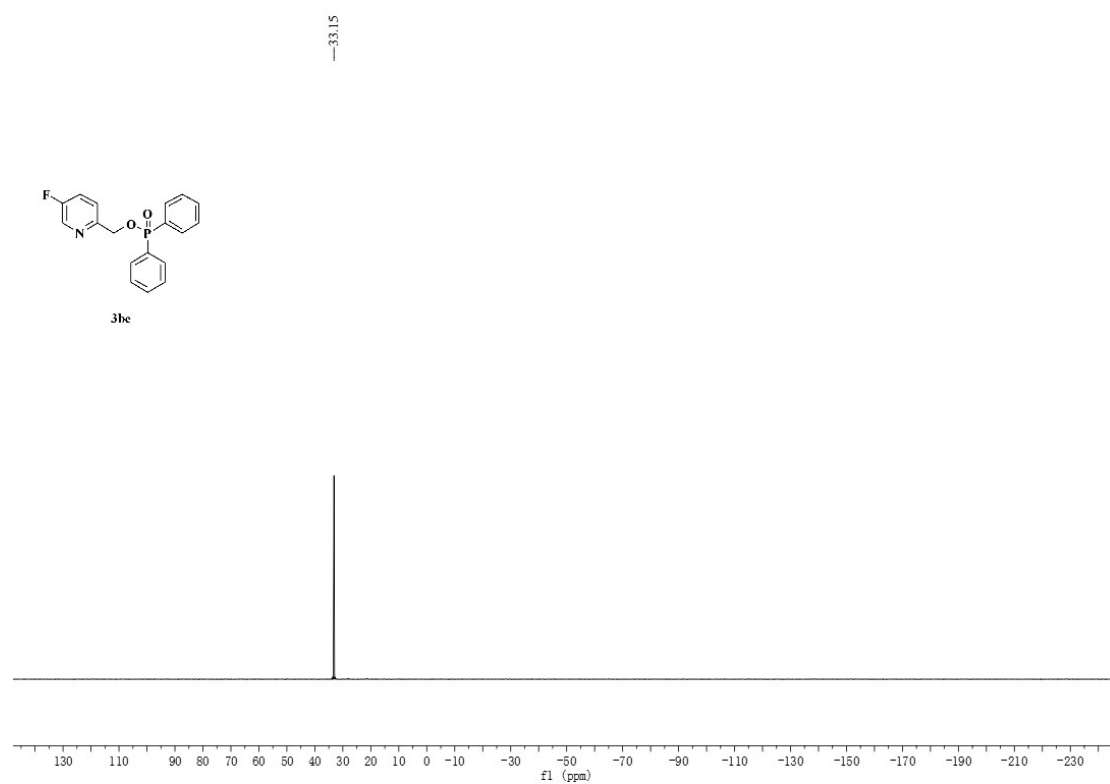

$^1\text{H}$  NMR of **3bf** (400 MHz,  $\text{CDCl}_3$ )

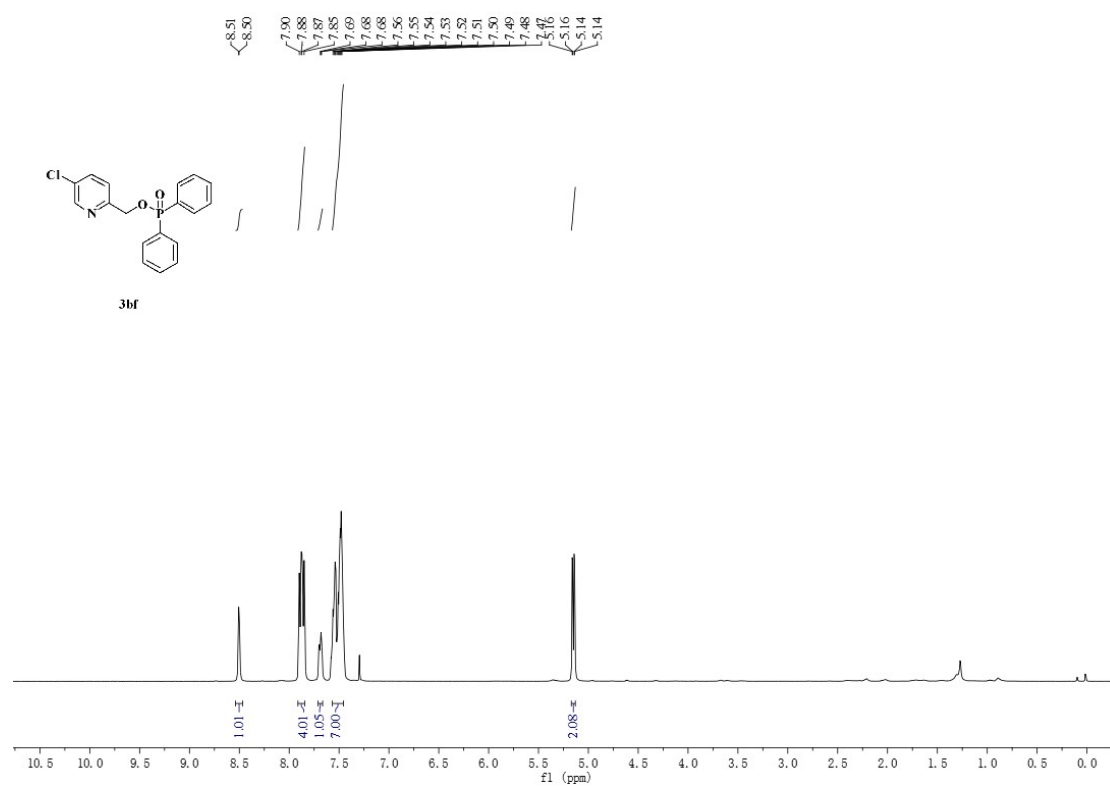

$^{13}\text{C}$  NMR of **3bf** (101 MHz,  $\text{CDCl}_3$ )

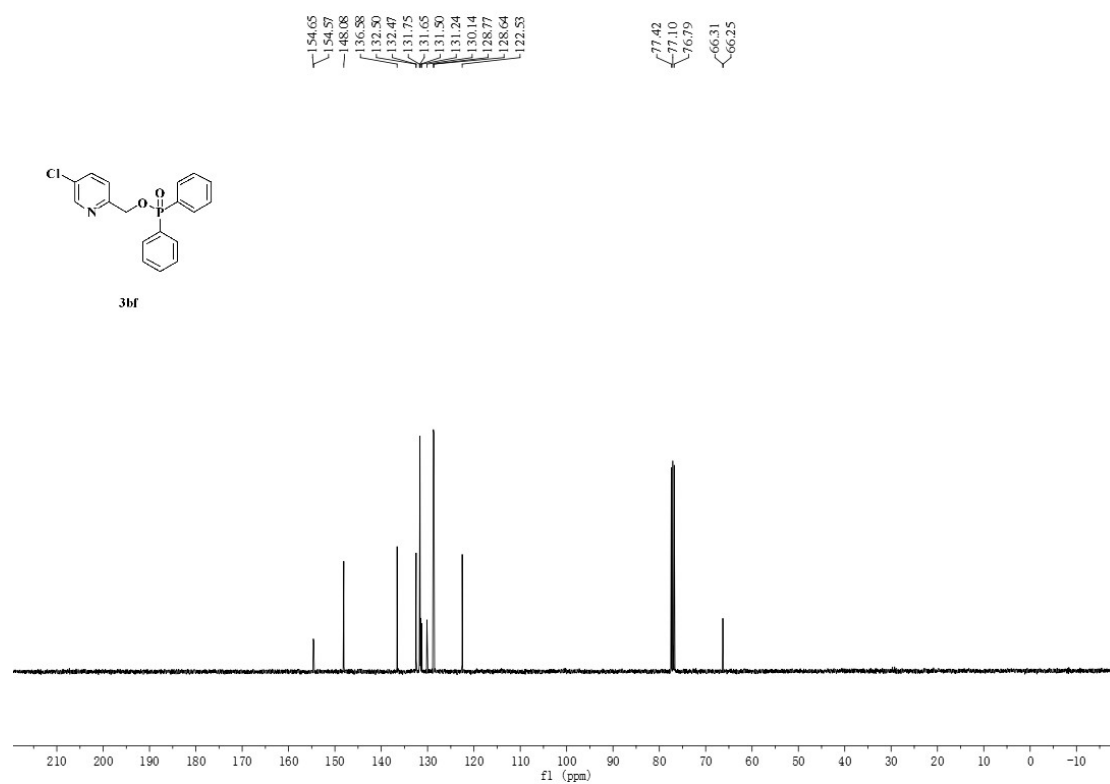

$^{31}\text{P}$  NMR of **3bf** (121 MHz,  $\text{CDCl}_3$ )

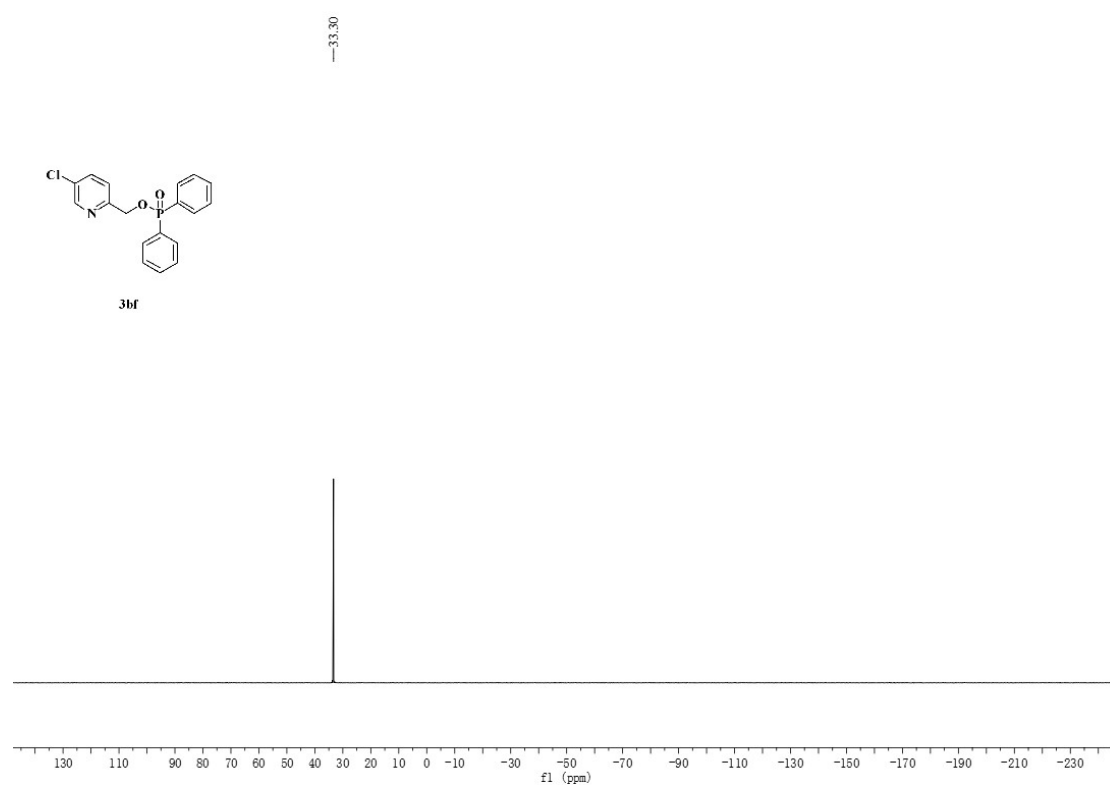

**3bg**

Chemical structure of **3bg** is shown as an inset. The structure is a 4-bromophenyl group attached to a methylene group, which is attached to a phosphorus atom. The phosphorus atom is also bonded to a phenyl group and an oxygen atom. The oxygen atom is bonded to a phenyl group. The structure is labeled **3bg**.

<sup>1</sup>H NMR spectrum (CDCl<sub>3</sub>) of compound **3bg**. The spectrum shows peaks at 8.59, 8.57, 7.87, 7.86, 7.84, 7.82, 7.81, 7.56, 7.54, 7.53, 7.49, 7.48, 7.47, 7.46, 7.45, 5.13, and 5.11 ppm. Integration values are 1.00, 5.07, 2.08, 2.08, and 2.07.

**3hg**

Brc1ccn(COP(=O)(c2ccccc2)c3ccccc13)c1

155.06  
154.98  
150.25  
139.44  
132.50  
132.47  
131.75  
131.64  
131.49  
130.13  
128.77  
128.64  
123.02  
119.89  
66.32  
66.27

210 200 190 180 170 160 150 140 130 120 110 100 90 80 70 60 50 40 30 20 10 0 -10

f1 (ppm)

$^{31}\text{P}$  NMR of **3bg** (121 MHz,  $\text{CDCl}_3$ )

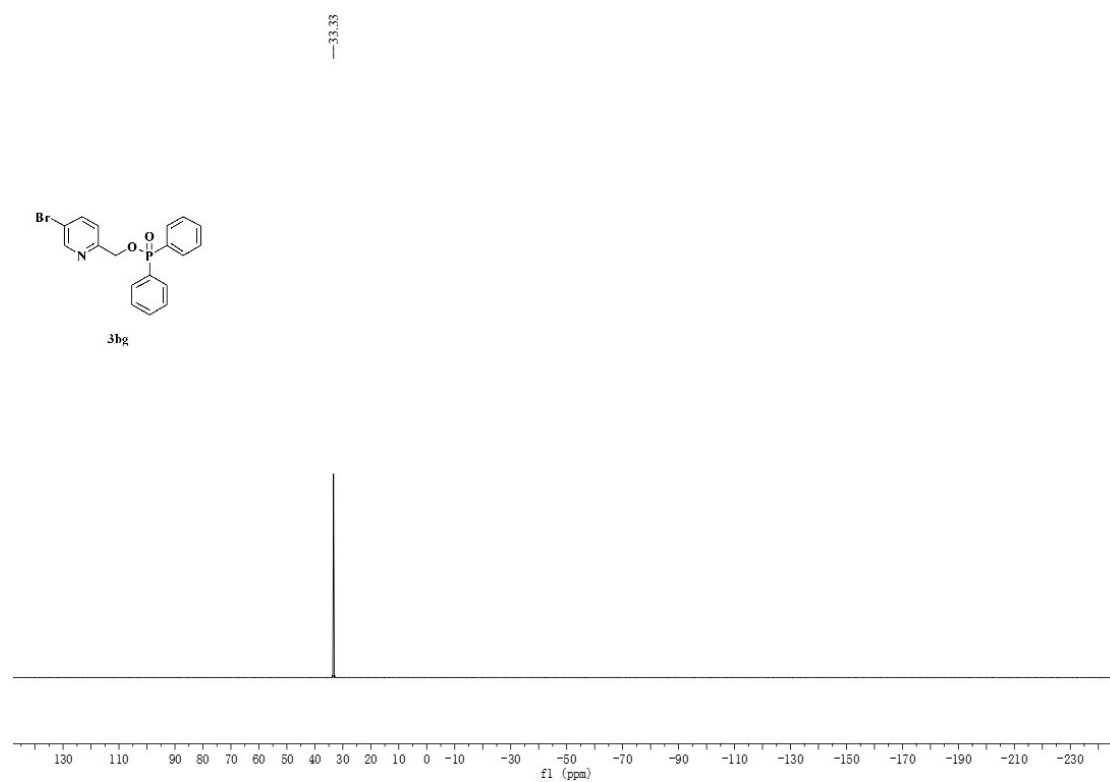

$^1\text{H}$  NMR of **3bh** (400 MHz,  $\text{CDCl}_3$ )

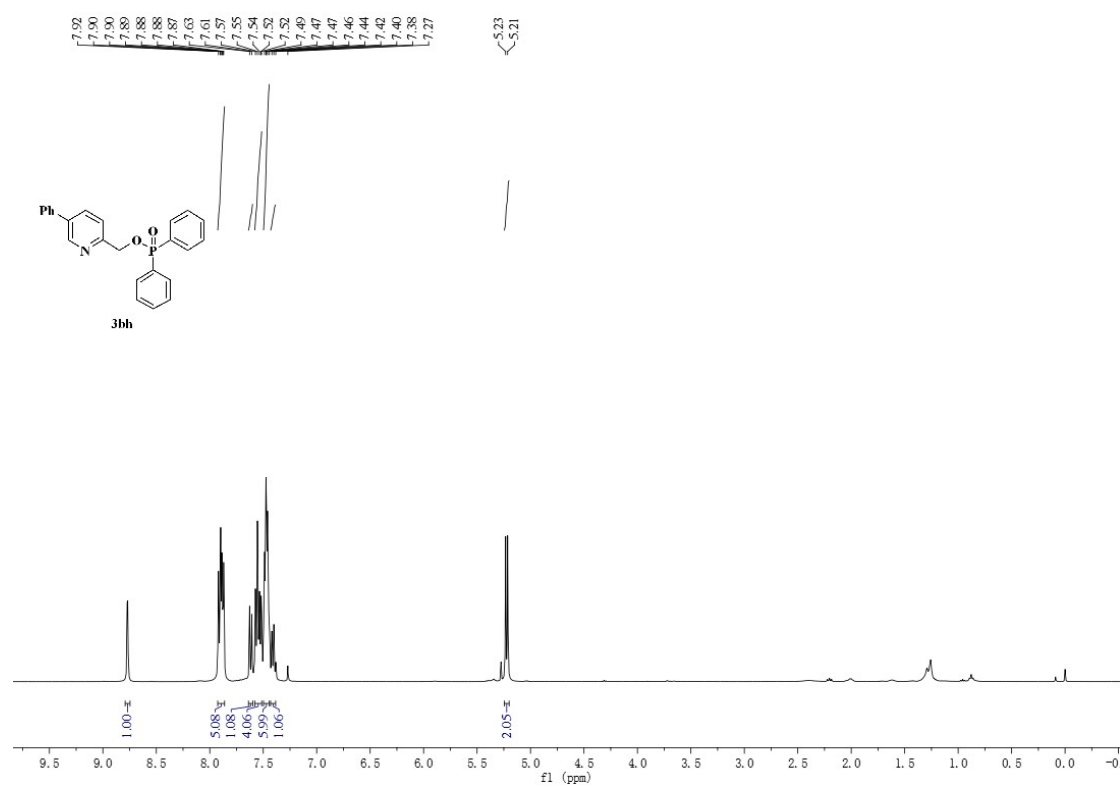

$^{13}\text{C}$  NMR of **3bh** (101 MHz,  $\text{CDCl}_3$ )

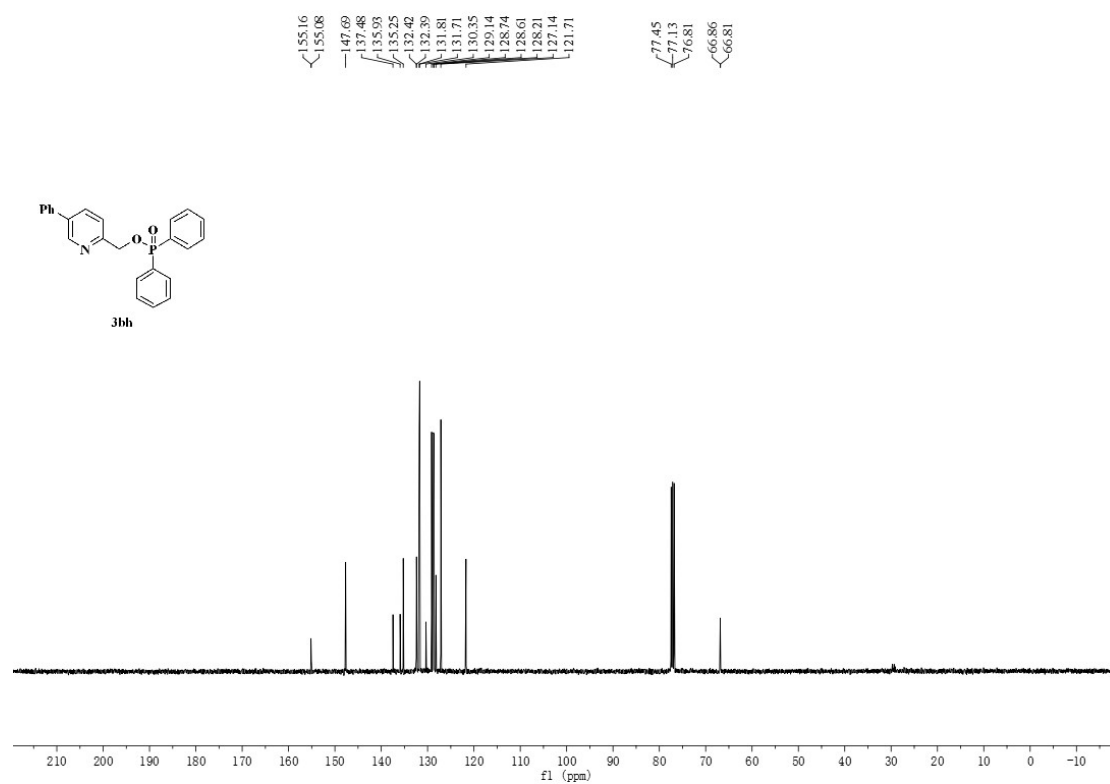

$^{31}\text{P}$  NMR of **3bh** (121 MHz,  $\text{CDCl}_3$ )

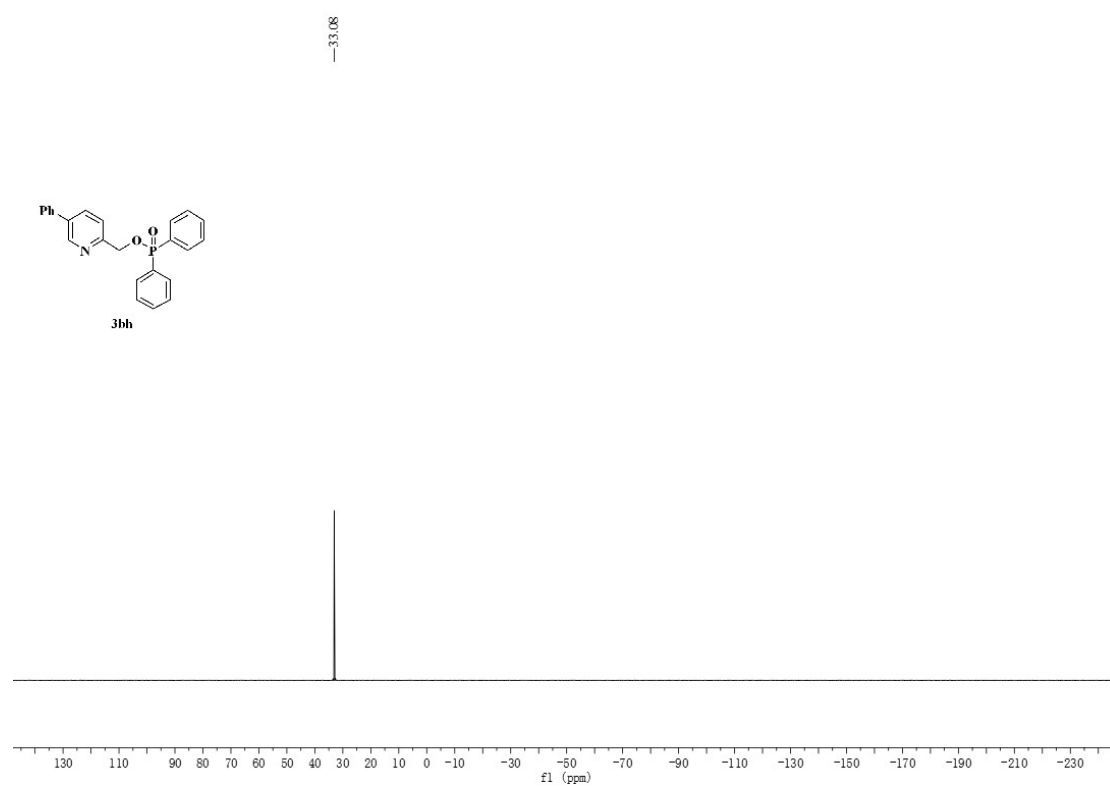



$^1\text{H}$  NMR of **3bi** (400 MHz,  $\text{CDCl}_3$ )

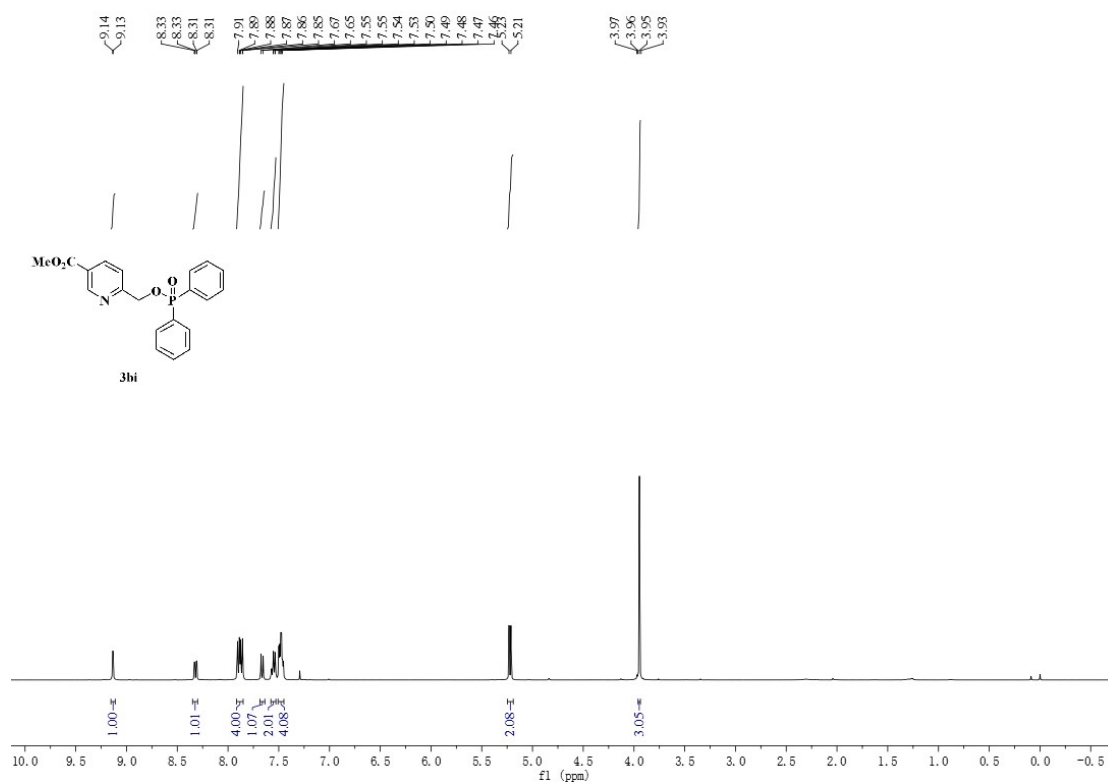

$^{13}\text{C}$  NMR of **3bi** (101 MHz,  $\text{CDCl}_3$ )

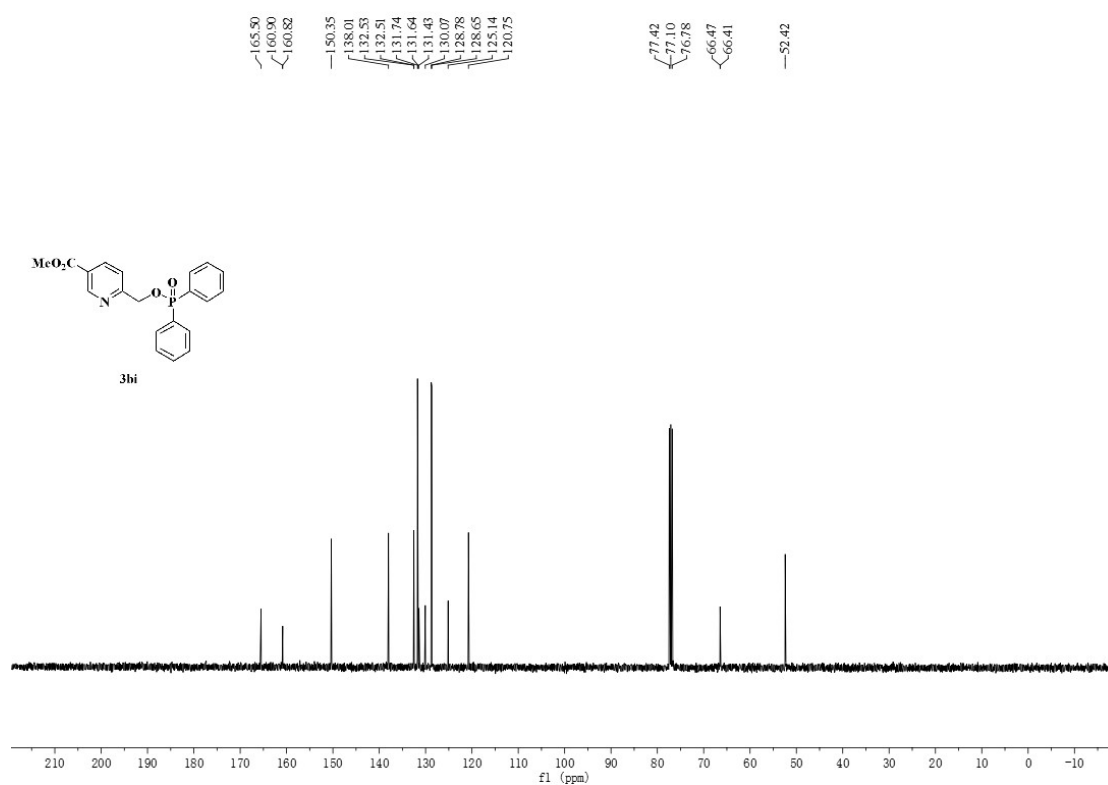

$^{31}\text{P}$  NMR of **3bi** (121 MHz,  $\text{CDCl}_3$ )

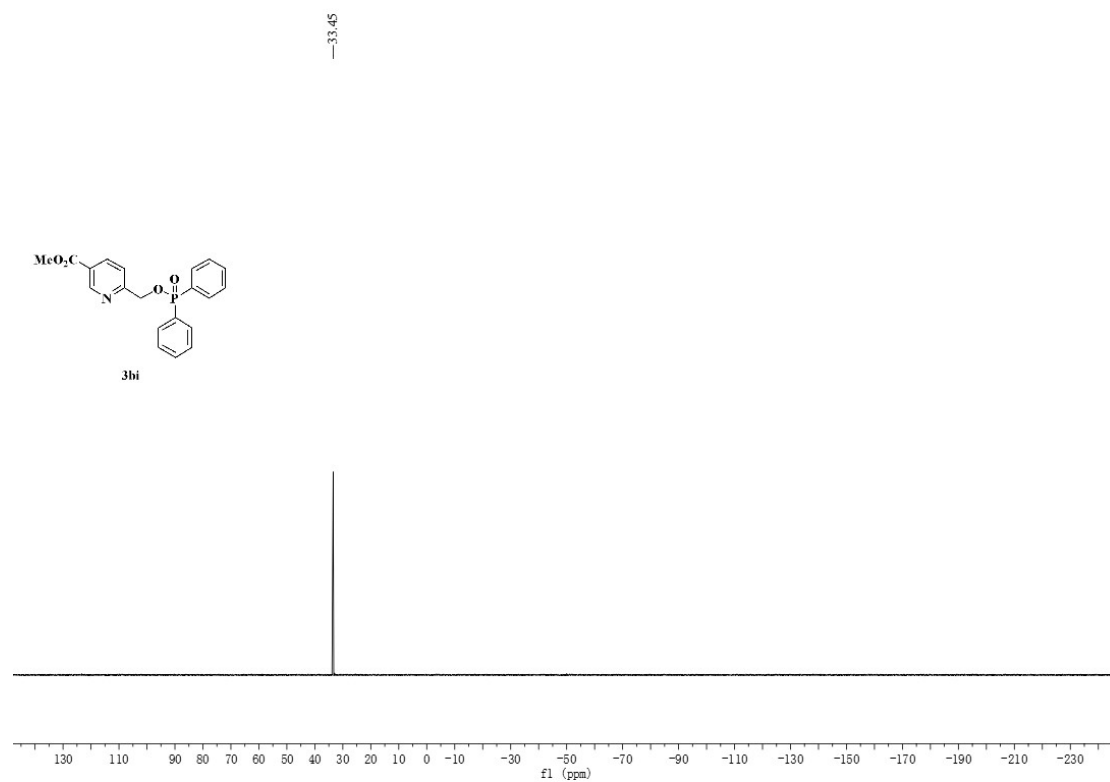

$^1\text{H}$  NMR of **3bj** (400 MHz,  $\text{CDCl}_3$ )

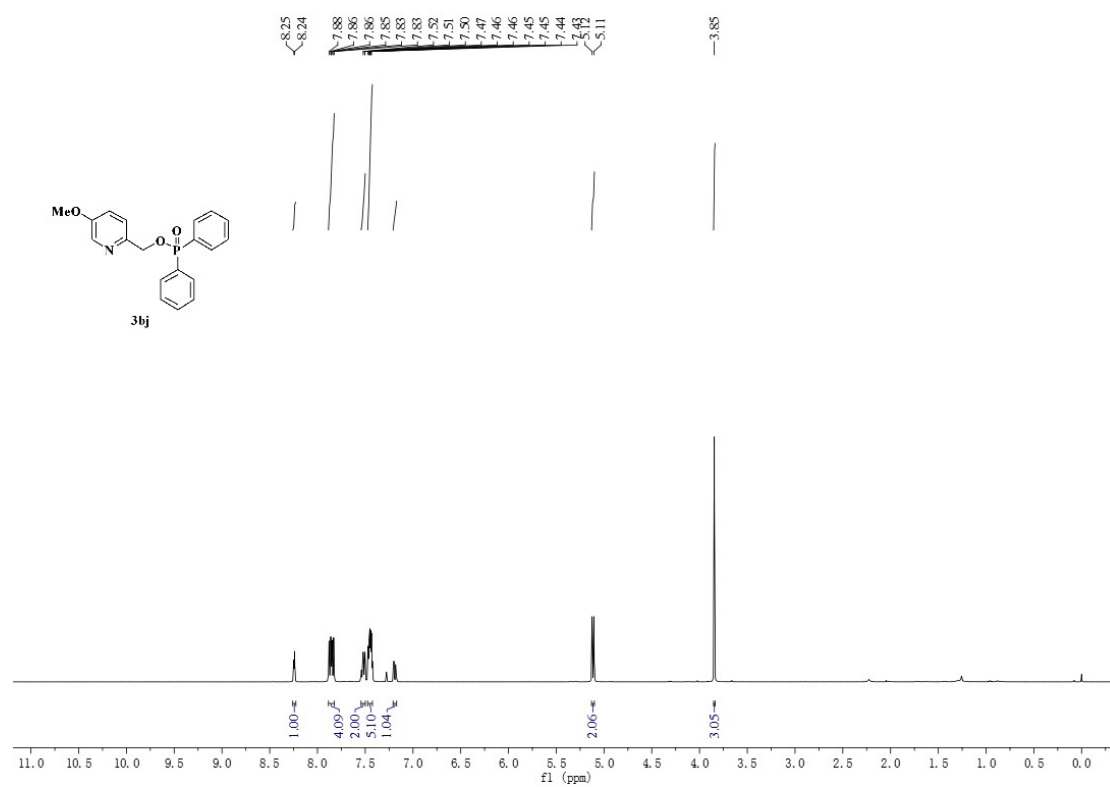

$^{13}\text{C}$  NMR of **3bj** (101 MHz,  $\text{CDCl}_3$ )

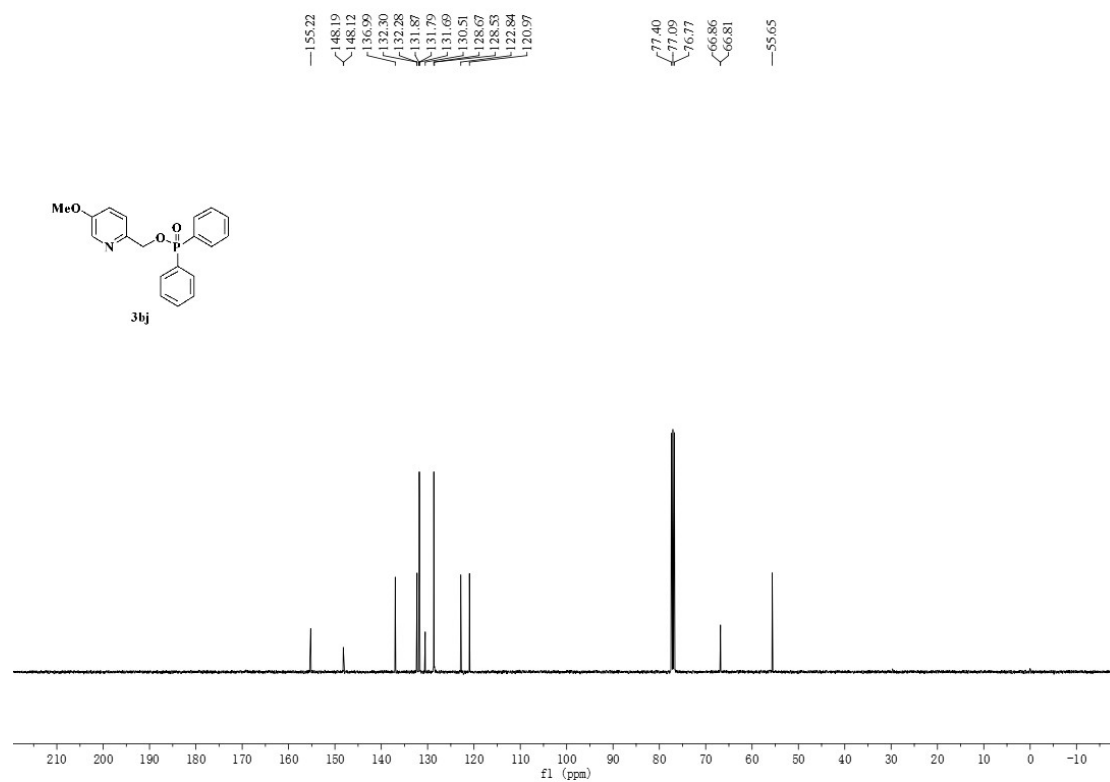

$^{31}\text{P}$  NMR of **3bj** (121 MHz,  $\text{CDCl}_3$ )

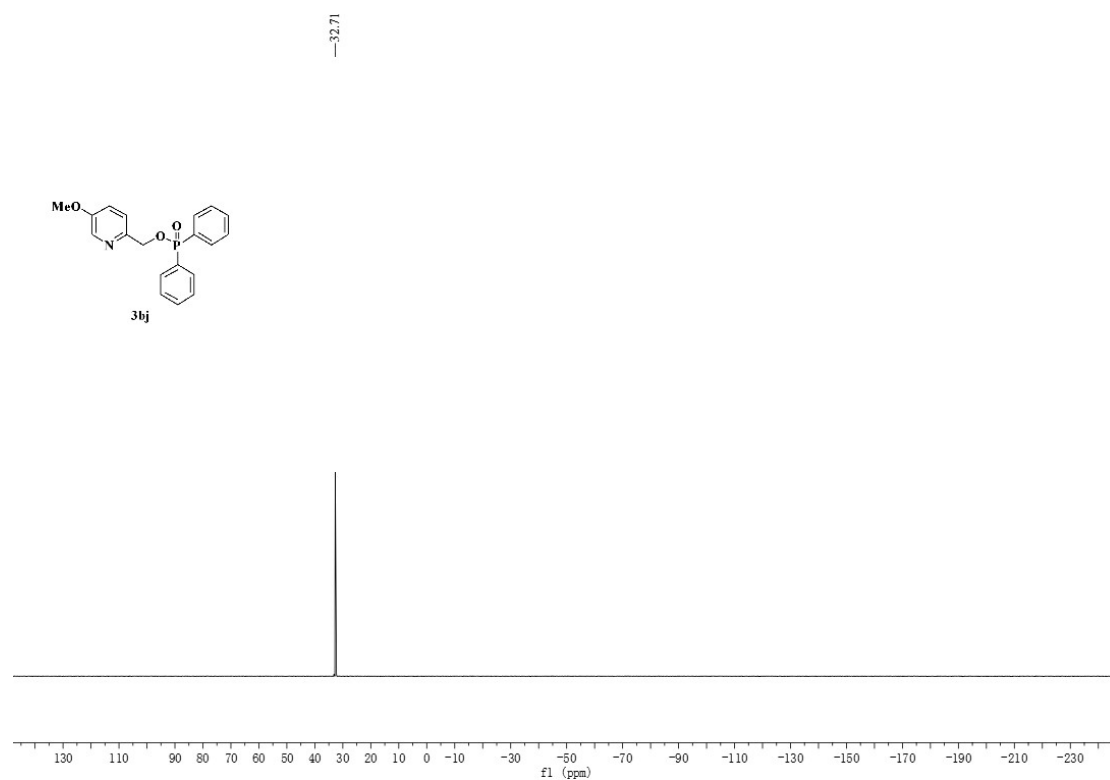

$^1\text{H}$  NMR of **3bk** (400 MHz,  $\text{CDCl}_3$ )

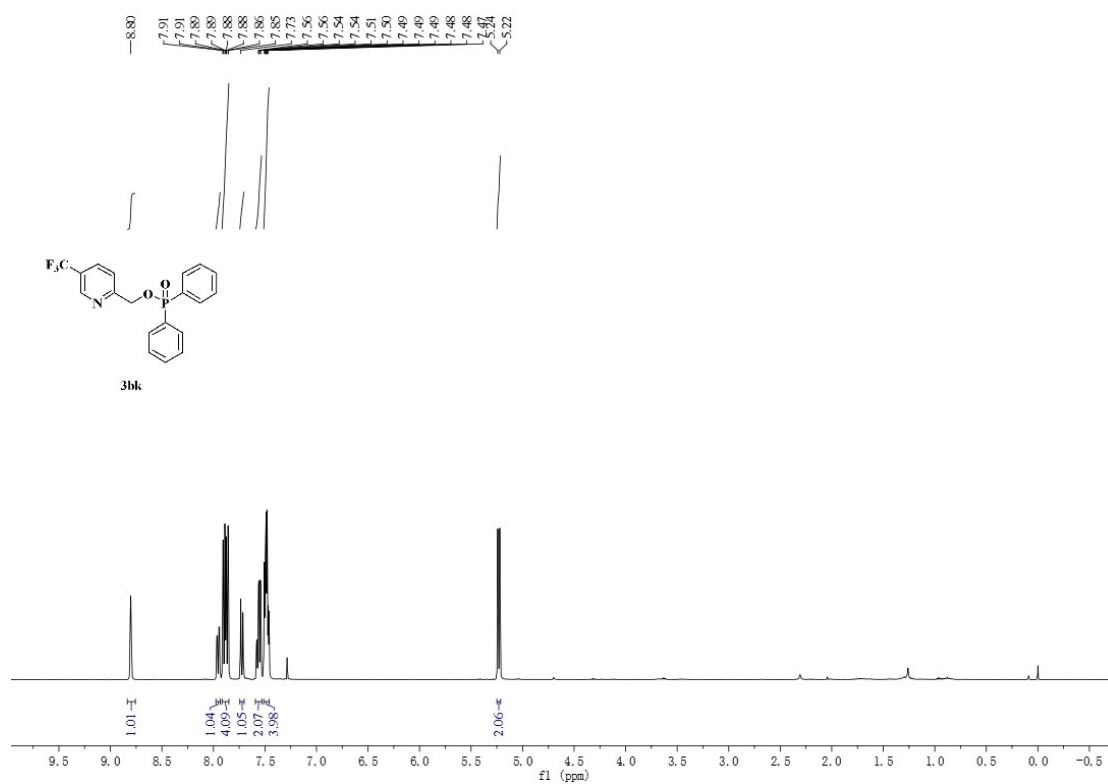

$^{19}\text{F}$  NMR of **3bk** (282 MHz,  $\text{CDCl}_3$ )

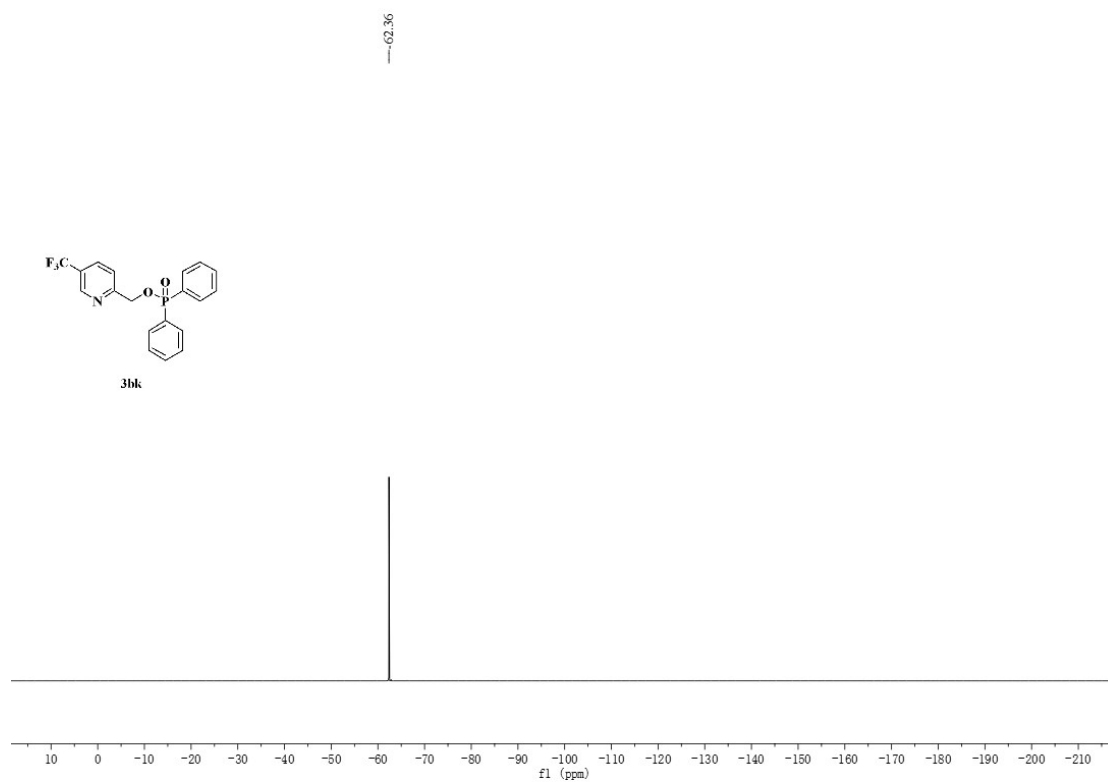

$^{31}\text{P}$  NMR of **3bk** (121 MHz,  $\text{CDCl}_3$ )

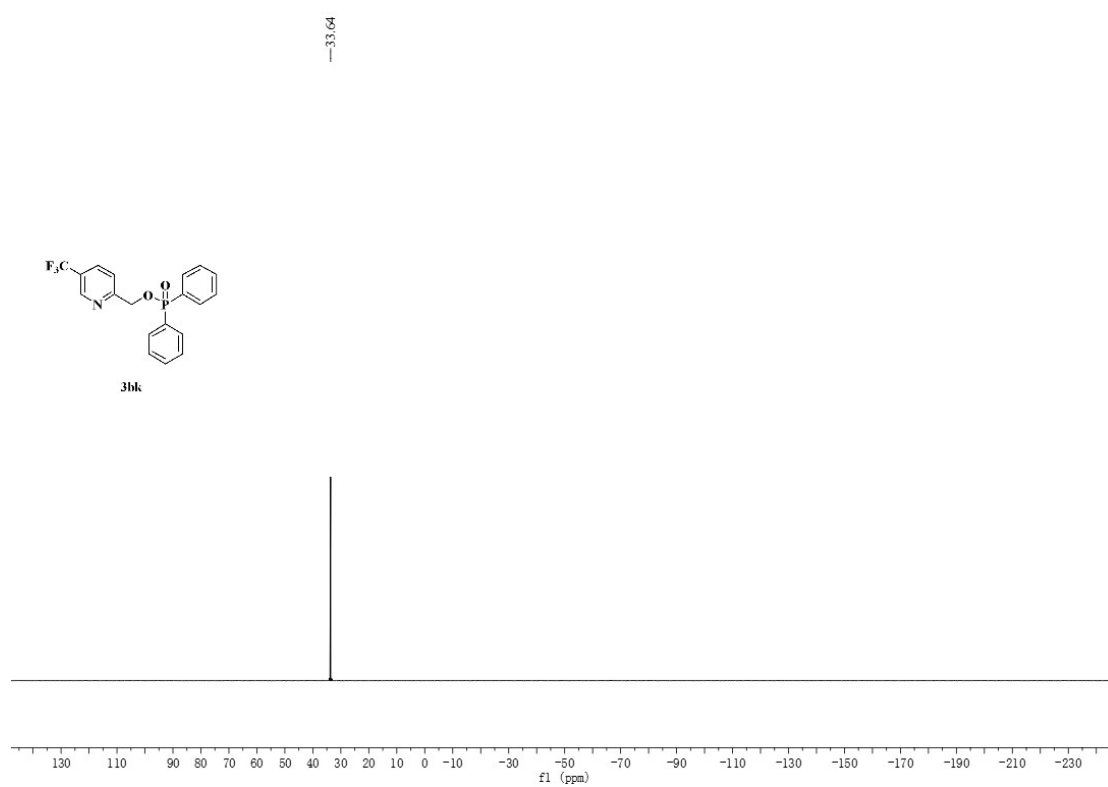

$^1\text{H}$  NMR of **3bl** (400 MHz,  $\text{CDCl}_3$ )

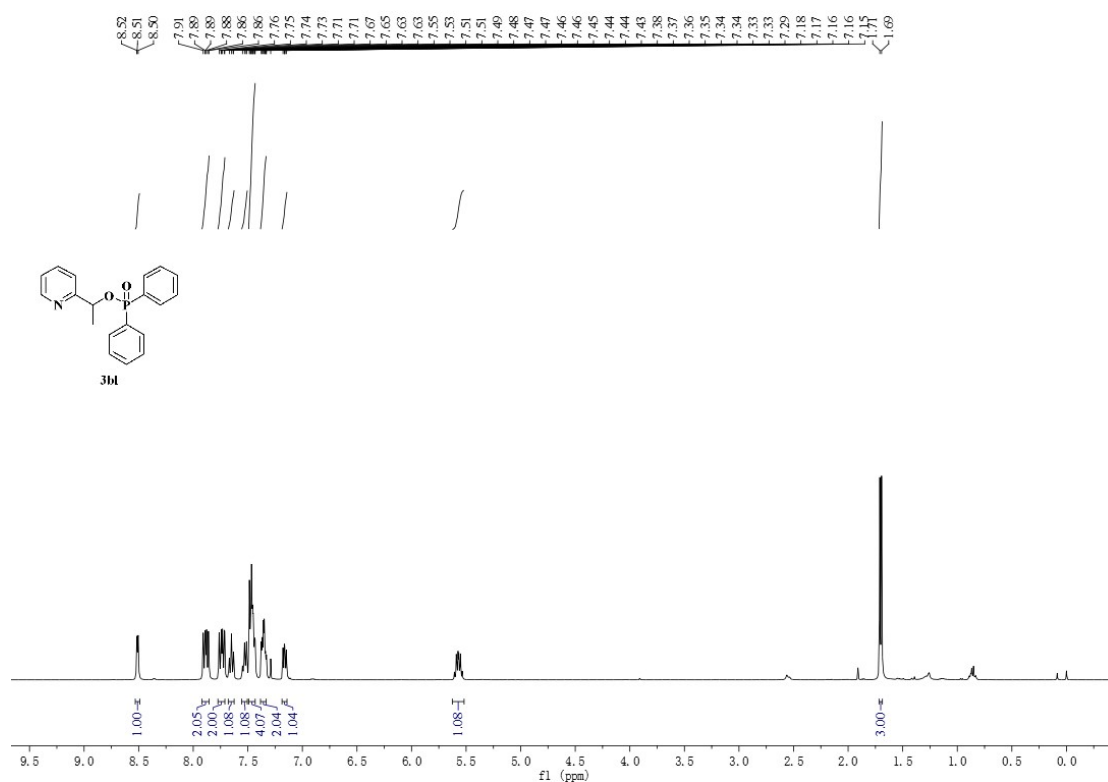

$^{13}\text{C}$  NMR of **3bl** (101 MHz,  $\text{CDCl}_3$ )

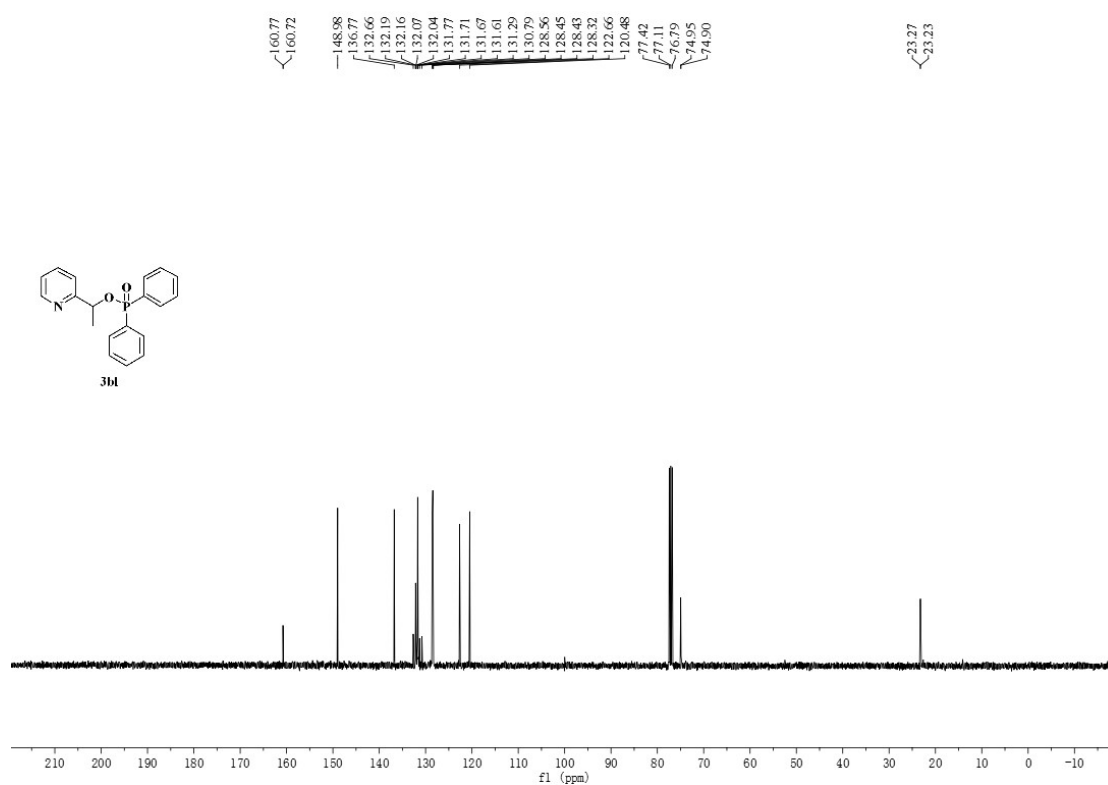

$^{31}\text{P}$  NMR of **3bl** (121 MHz,  $\text{CDCl}_3$ )

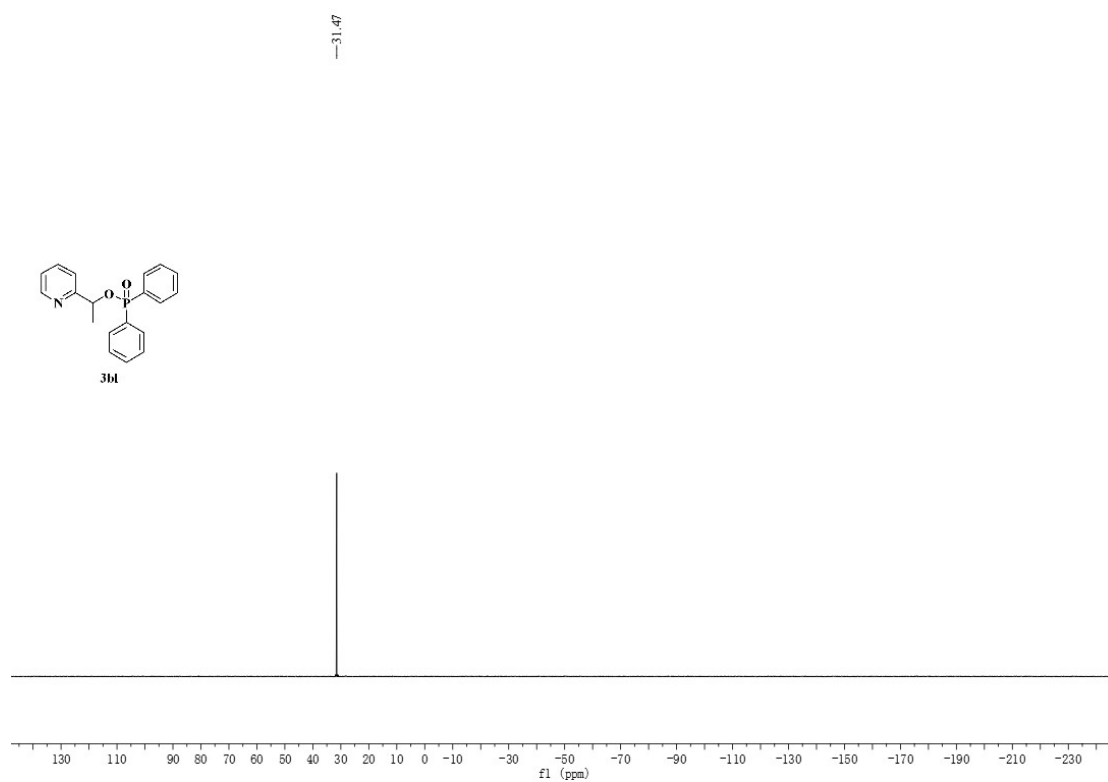

$^1\text{H}$  NMR of **3bm** (400 MHz,  $\text{CDCl}_3$ )

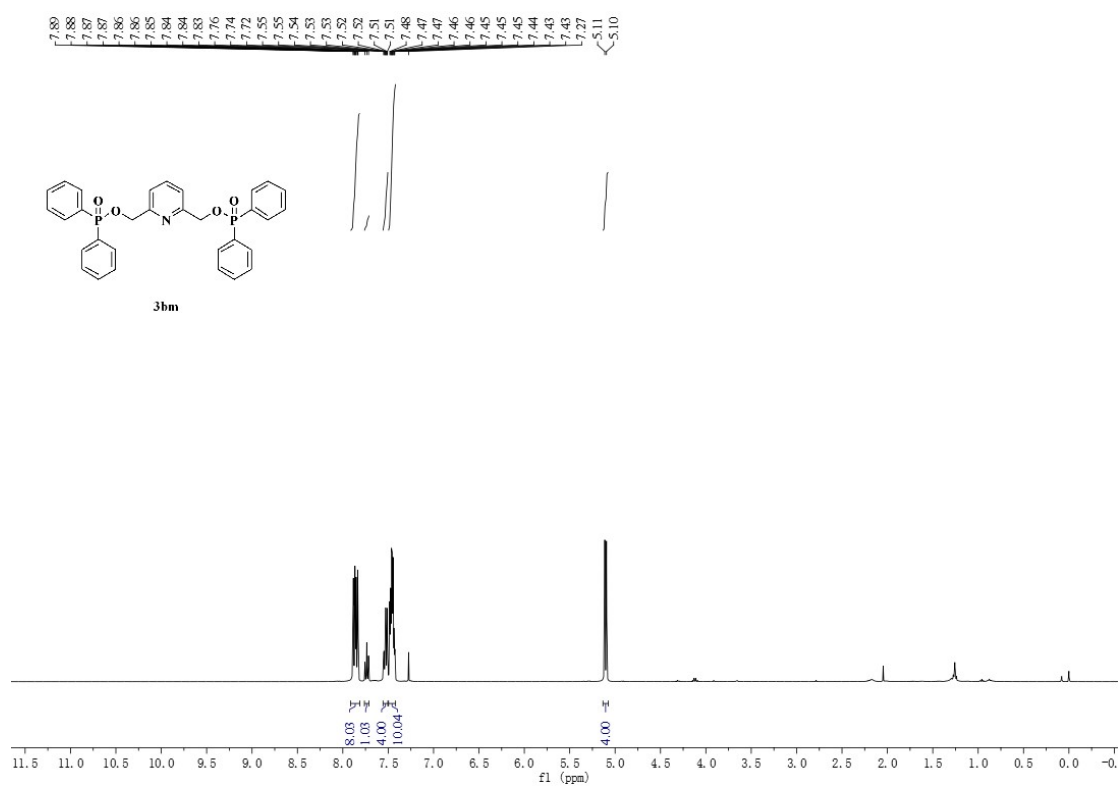

$^{13}\text{C}$  NMR of **3bm** (101 MHz,  $\text{CDCl}_3$ )

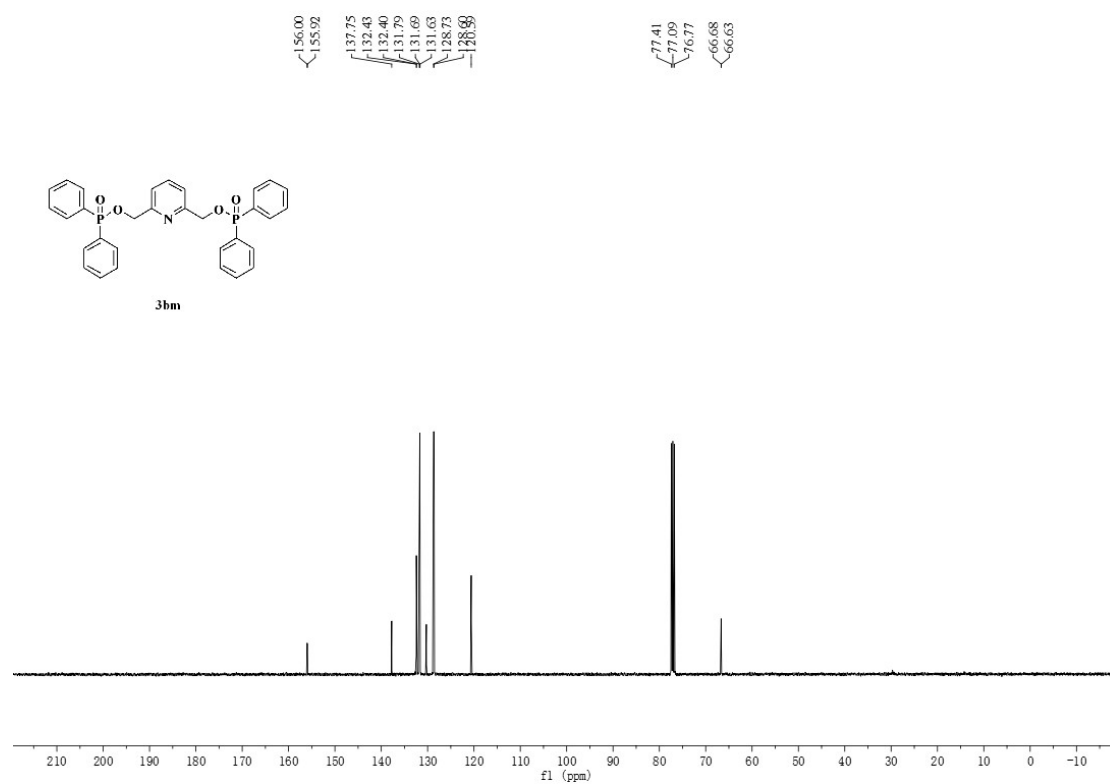

$^{31}\text{P}$  NMR of **3bm** (121 MHz,  $\text{CDCl}_3$ )

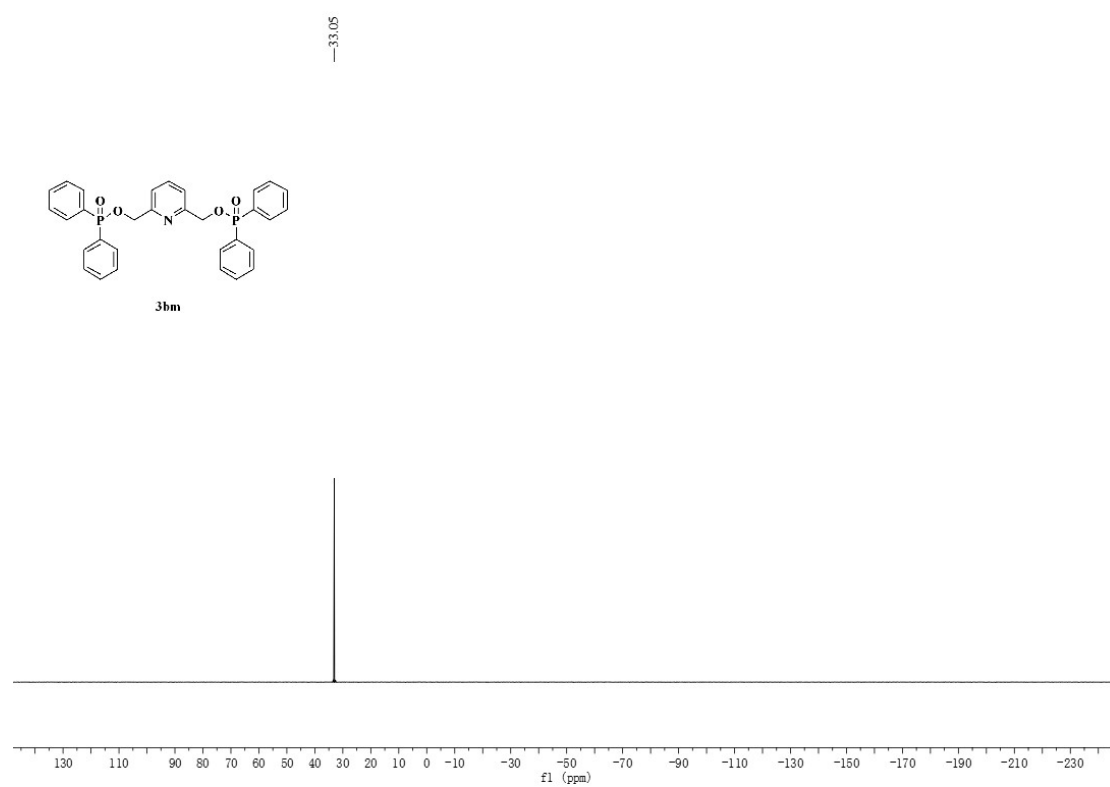





$^{31}\text{P}$  NMR of **3bn** (121 MHz,  $\text{CDCl}_3$ )

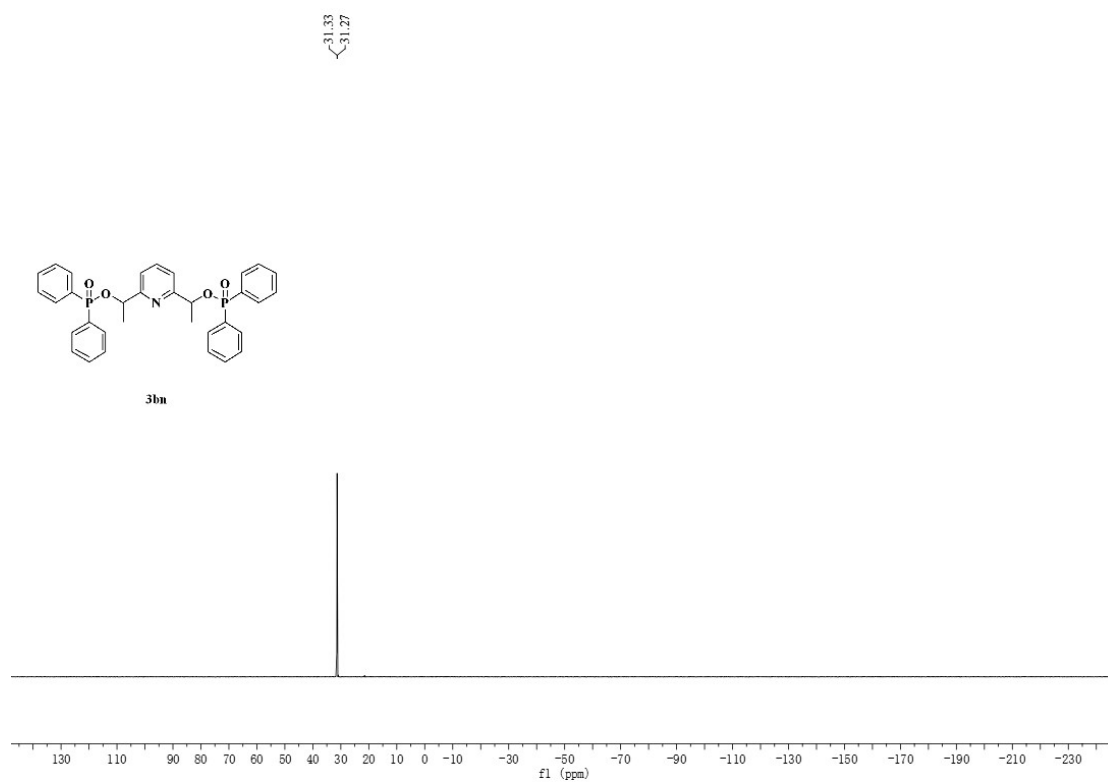

$^1\text{H}$  NMR of **3bo** (400 MHz,  $\text{CDCl}_3$ )

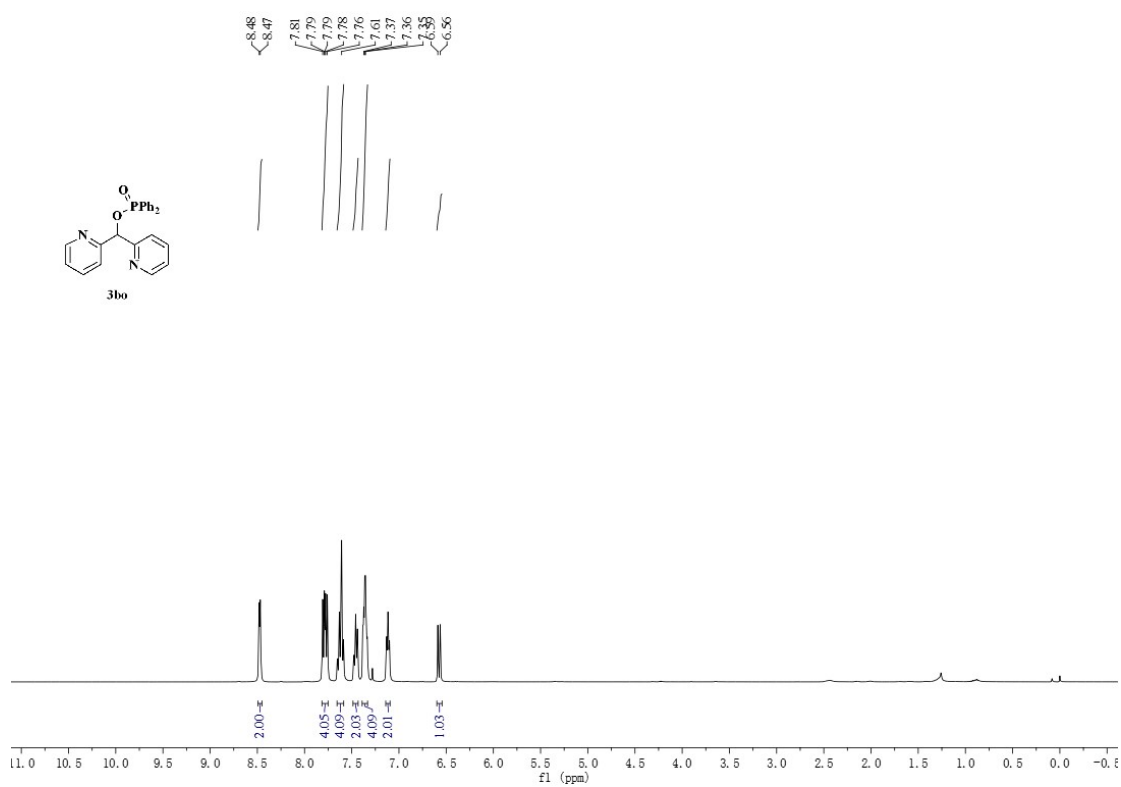

$^{13}\text{C}$  NMR of **3bo** (101 MHz,  $\text{CDCl}_3$ )

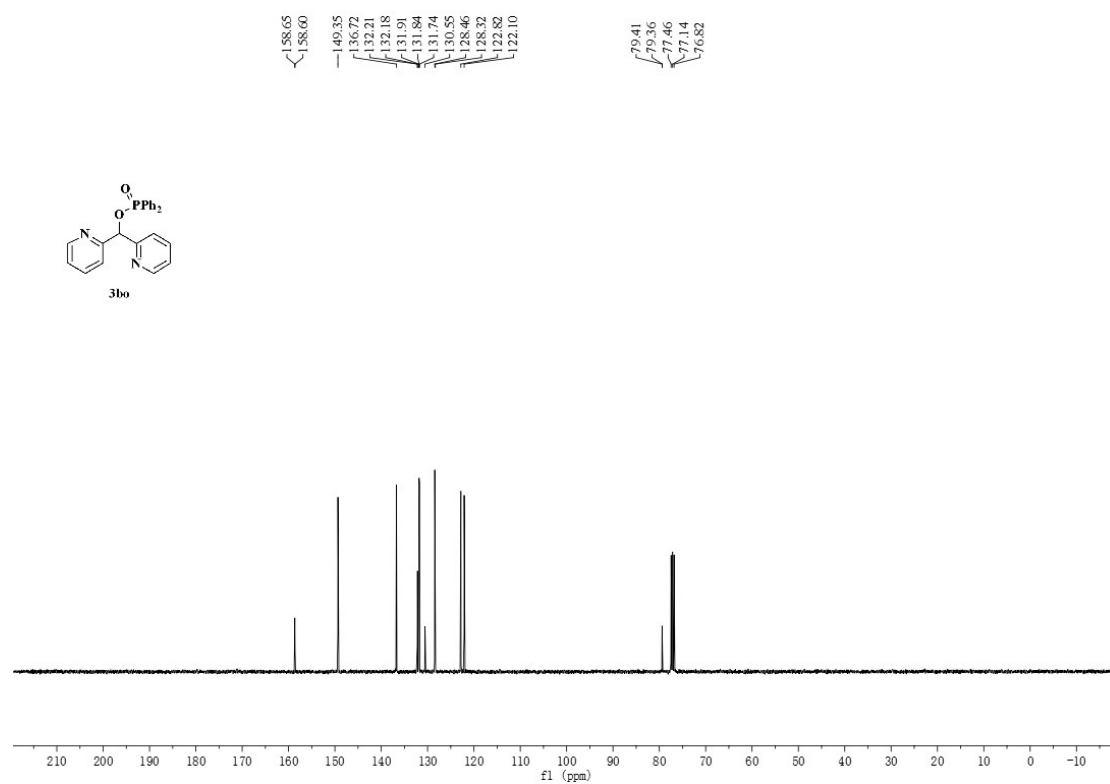

$^{31}\text{P}$  NMR of **3bo** (121 MHz,  $\text{CDCl}_3$ )

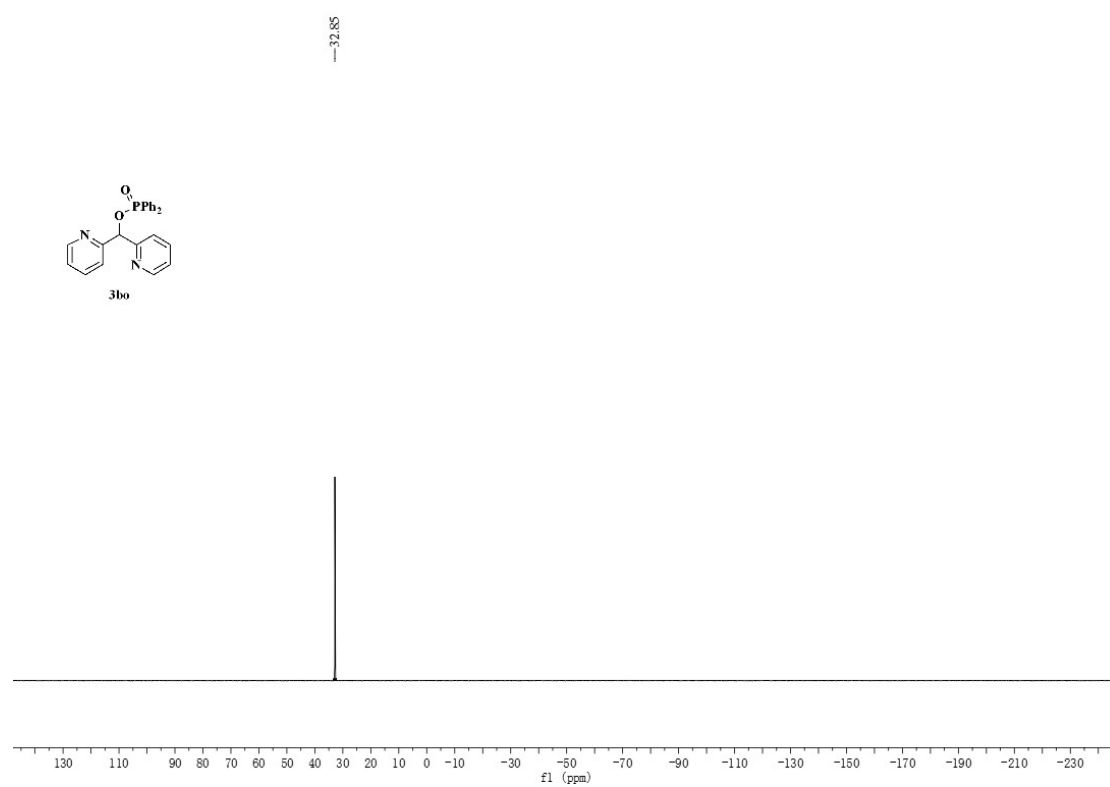

$^1\text{H}$  NMR of **3bp** (400 MHz,  $\text{CDCl}_3$ )

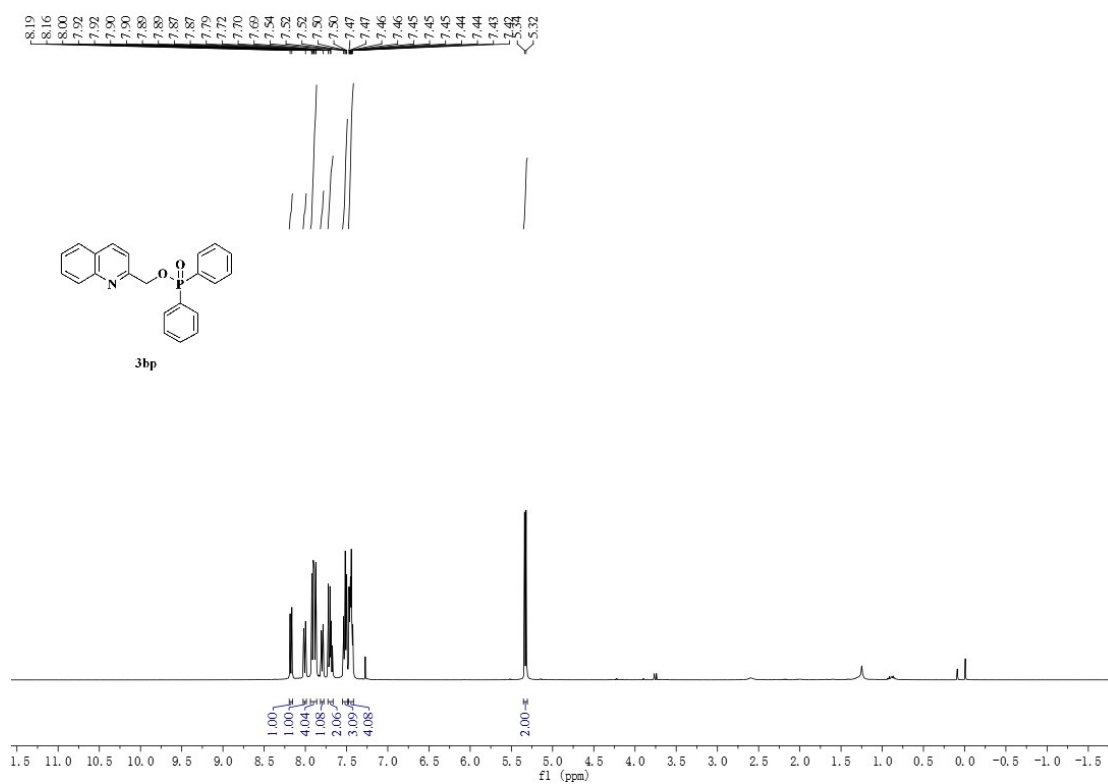

$^{13}\text{C}$  NMR of **3bp** (101 MHz,  $\text{CDCl}_3$ )

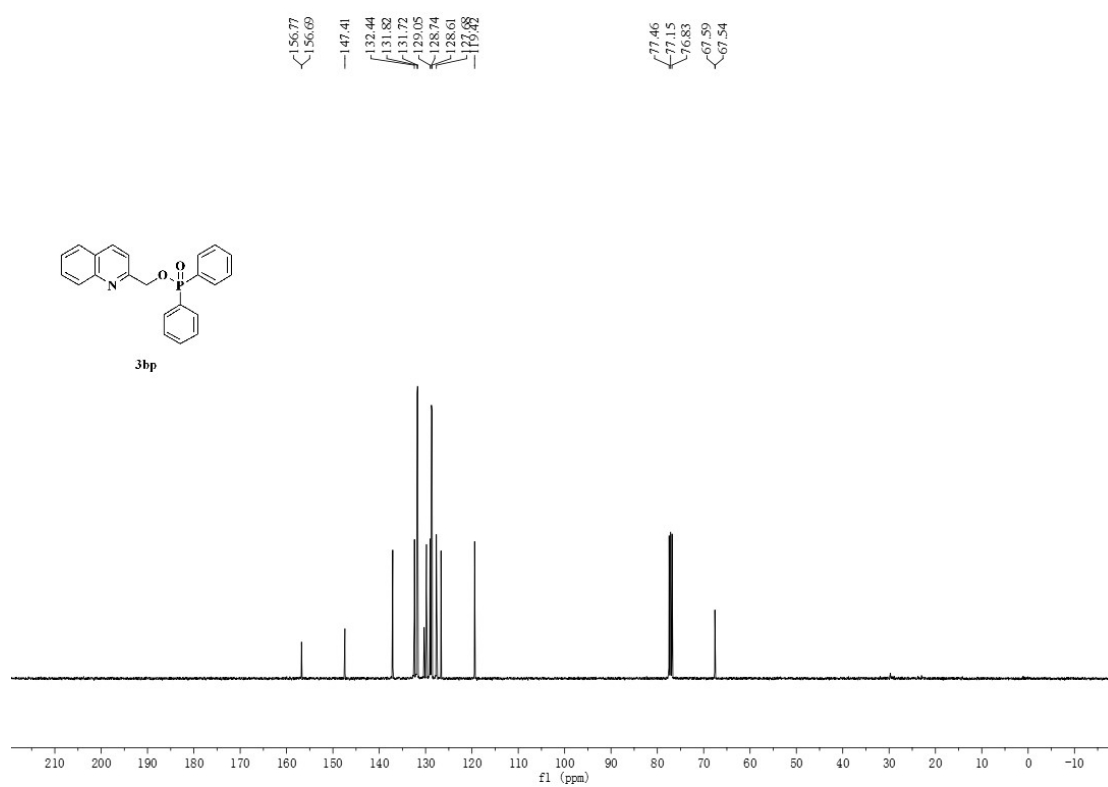

$^{31}\text{P}$  NMR of **3bp** (121 MHz,  $\text{CDCl}_3$ )

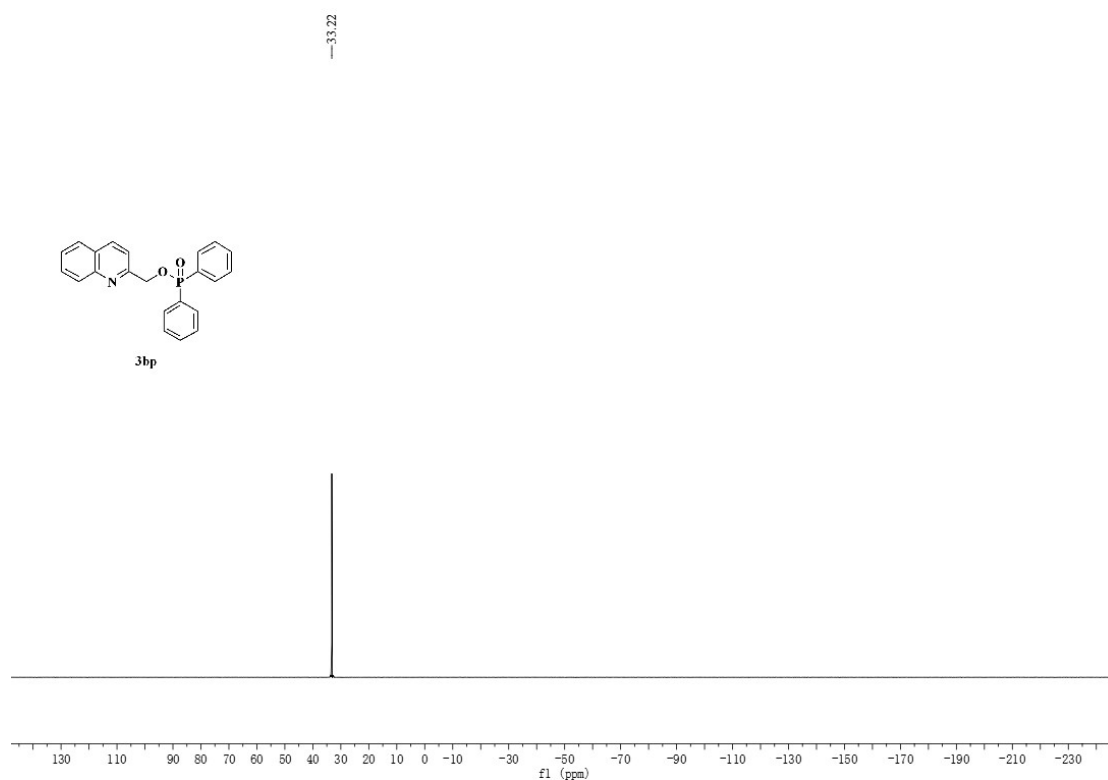

$^1\text{H}$  NMR of **3bq** (400 MHz,  $\text{CDCl}_3$ )

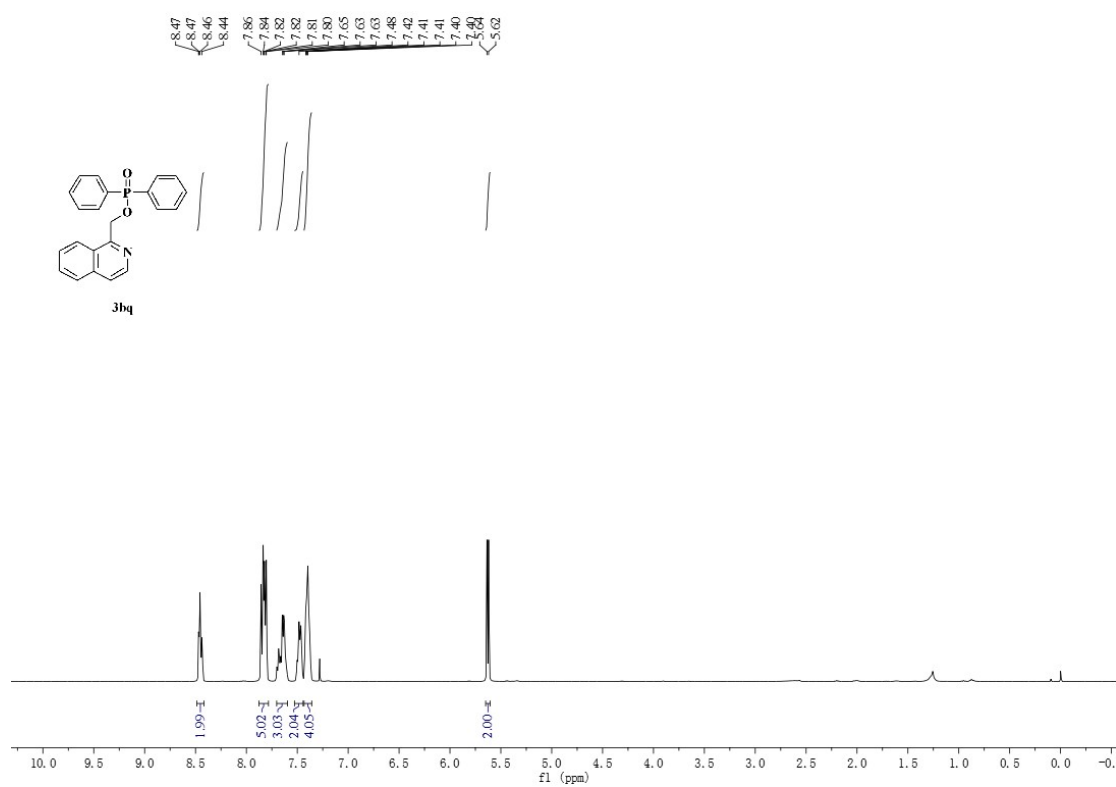

$^{13}\text{C}$  NMR of **3bq** (101 MHz,  $\text{CDCl}_3$ )

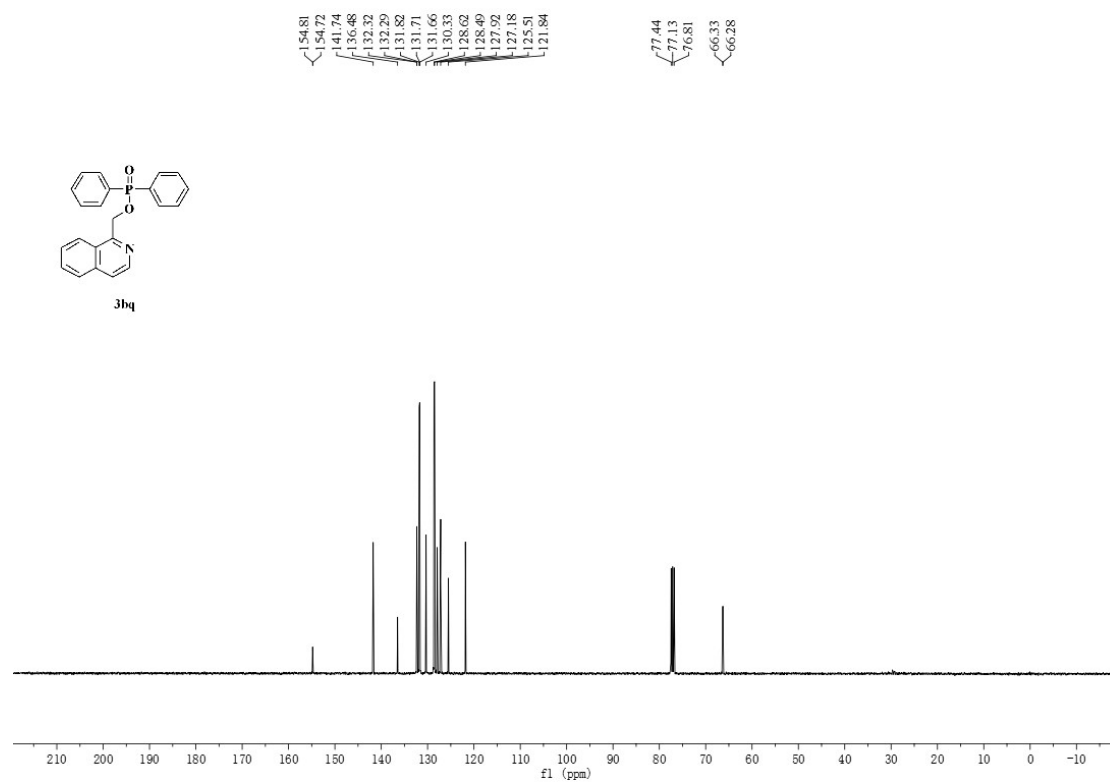

$^{31}\text{P}$  NMR of **3bq** (121 MHz,  $\text{CDCl}_3$ )

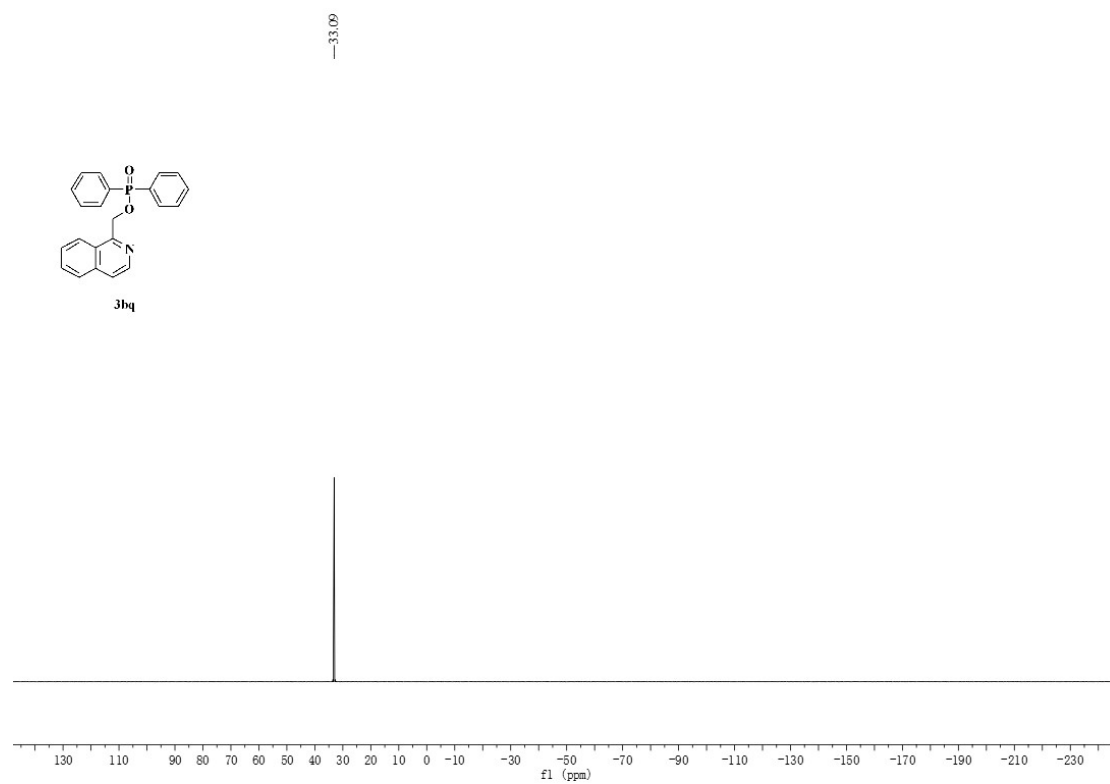

Supplement: Additional file 1 [file 1860-5397-18-123-S1.pdf]
